# Supplementary material for: A Subpathway and Target Gene Cluster-Based Approach Uncovers lncRNAs Associated with Human Primordial Follicle Activation
Source: Int J Mol Sci. 2023 Jun 23;24(13):10525. doi: 10.3390/ijms241310525 (PMC10342156; doi:10.3390/ijms241310525)
Supplement: Supplementary file 1 [file ijms-24-10525-s001.zip › Supplementary Tables.xlsx]

## Sheet: Table S1
Table S1. Differential expressed lncRNA in follicles (n = 65) and granulosa cells (n = 22) during PFA.
Follicles:							Granulosa cells:
	p_val	avg_logFC	pct.1	pct.2	p_val_adj			p_val	avg_logFC	pct.1	pct.2	p_val_adj
MRVI1-AS1	4.2742e-11	6.4969	1	0.522	9.44599e-09		H19	1.22181e-07	5.01679	0.913	0.619	2.70021e-05
LINC01006	8.09159e-10	5.74322	1	0.696	1.78824e-07		WT1-AS	1.55885e-08	4.98267	0.913	0.643	3.44507e-06
USP3-AS1	5.16529e-11	5.19391	1	0.783	1.14153e-08		ADIRF-AS1	1.56221e-05	4.7693	0.739	0.381	0.00345248
SLC8A1-AS1	5.21528e-11	5.08794	1	0.957	1.15258e-08		ZNF674-AS1	2.57178e-07	4.44451	0.87	0.5	5.68363e-05
NPSR1-AS1	2.03154e-10	4.50693	1	0.913	4.4897e-08		SNHG3	6.45139e-06	4.09539	0.826	0.786	0.00142576
CASC8	4.89745e-10	4.32196	1	0.826	1.08234e-07		SNHG17	2.77559e-07	3.6253	0.913	0.976	6.13406e-05
TEX41	7.56709e-10	4.2506	1	0.826	1.67233e-07		XIST	1.94654e-07	3.52769	0.957	0.833	4.30186e-05
CYP1B1-AS1	1.57578e-10	4.16335	1	0.565	3.48248e-08		THAP9-AS1	9.61827e-06	3.42105	0.87	0.833	0.00212564
STX18-AS1	9.6155e-10	4.02907	1	0.696	2.12503e-07		SNHG5	9.10962e-08	3.26133	1	0.976	2.01323e-05
LINC00511	5.2897e-09	3.9296	1	0.87	1.16902e-06		GAS5	2.64944e-08	3.19972	1	1	5.85527e-06
LINC00937	9.88543e-11	3.8972	1	0.913	2.18468e-08		SNHG8	1.05908e-08	3.0174	0.957	0.976	2.34056e-06
LINC00491	1.68659e-09	3.88678	0.952	0.435	3.72737e-07		MALAT1	9.0725e-06	2.88636	1	1	0.00200502
LIPE-AS1	2.55606e-07	3.83906	1	0.739	5.64889e-05		SNHG7	1.92391e-05	2.79752	0.957	1	0.00425183
ST8SIA6-AS1	1.93936e-08	3.76299	0.905	0.261	4.28597e-06		EPB41L4A-AS1	1.42839e-07	2.6712	0.913	0.976	3.15674e-05
PITPNA-AS1	6.40603e-09	3.76132	0.952	0.522	1.41573e-06		ZFAS1	2.09086e-08	2.55729	1	1	4.6208e-06
CBR3-AS1	3.91638e-10	3.72556	1	0.609	8.65521e-08		SNHG16	3.62366e-08	2.54305	1	1	8.0083e-06
SSTR5-AS1	1.18326e-10	3.69804	1	0.87	2.61499e-08		SNHG15	3.59896e-08	2.49367	0.957	0.905	7.95371e-06
F11-AS1	3.94655e-09	3.58509	0.976	0.652	8.72188e-07		SNHG1	2.94719e-05	2.21683	1	1	0.00651329
AFAP1-AS1	1.16635e-10	3.57332	1	0.739	2.57763e-08		SNHG6	9.38402e-09	2.01102	0.957	1	2.07387e-06
LINC00467	4.21279e-07	3.51195	0.857	0.348	9.31027e-05		MIR22HG	5.07056e-06	1.9065	0.957	0.952	0.00112059
CASC9	4.17183e-09	3.49289	0.976	0.696	9.21975e-07		SNHG12	0.000152523	1.62046	0.87	0.976	0.0337077
PRKCQ-AS1	7.42069e-10	3.4572	1	0.696	1.63997e-07		HCG17	4.74321e-05	0.57967	0.957	0.952	0.0104825
PTPRG-AS1	1.25669e-08	3.44576	1	0.652	2.77728e-06
KTN1-AS1	9.57232e-09	3.03911	1	0.565	2.11548e-06
USP2-AS1	2.08597e-07	2.9111	0.929	0.652	4.61e-05
LINC00922	6.75514e-11	2.90846	1	0.739	1.49289e-08
LINC00520	2.63473e-08	2.83231	0.881	0.217	5.82276e-06
FER1L6-AS2	3.0047e-10	2.80399	1	0.609	6.64038e-08
ZNF503-AS1	9.74571e-07	2.76237	0.929	0.565	0.00021538
DGUOK-AS1	1.21507e-08	2.58974	0.976	0.522	2.6853e-06
ARHGEF26-AS1	2.73097e-08	2.57176	0.976	0.478	6.03545e-06
LIMD1-AS1	6.99906e-07	2.52713	0.881	0.304	0.000154679
PCAT1	2.08791e-08	2.48478	1	0.87	4.61427e-06
LEF1-AS1	2.31082e-07	2.46748	0.857	0.391	5.10691e-05
PROSER2-AS1	4.6763e-11	2.44473	1	0.739	1.03346e-08
LINC00943	5.45215e-08	2.42652	0.905	0.261	1.20493e-05
ZNF503-AS2	4.85403e-05	2.27999	0.762	0.304	0.0107274
GNG12-AS1	4.50443e-10	2.17592	1	0.913	9.95479e-08
LMCD1-AS1	3.08895e-08	2.12703	1	0.826	6.82658e-06
LOXL1-AS1	4.26056e-05	1.97389	0.929	0.478	0.00941583
LINC00882	0.000206265	1.93313	1	0.87	0.0455846
DLEU2	2.77224e-05	1.8552	1	0.87	0.00612666
PWAR6	1.0235e-05	1.82473	0.929	0.522	0.00226194
LINC00649	4.1123e-06	1.82211	0.976	0.739	0.000908818
NR2F1-AS1	6.67204e-06	1.80811	0.952	0.609	0.00147452
ENTPD3-AS1	0.00021221	1.72259	0.952	0.652	0.0468984
SBF2-AS1	0.000144563	1.66429	0.952	0.652	0.0319485
LINC00665	8.72537e-07	1.59102	1	0.913	0.000192831
LINC00707	4.22746e-08	1.5396	1	0.87	9.34268e-06
CCDC13-AS1	2.4249e-05	1.51272	0.786	0.217	0.00535904
MAGI2-AS3	2.85385e-05	1.48053	0.976	0.87	0.006307
DDX11-AS1	5.99924e-07	1.44379	0.929	0.522	0.000132583
MIR4500HG	1.73386e-06	1.41542	1	0.783	0.000383184
OIP5-AS1	1.41071e-05	1.39766	1	0.913	0.00311767
IQCH-AS1	3.17446e-07	1.30462	0.976	0.609	7.01555e-05
CERS6-AS1	1.11185e-05	1.2957	0.976	0.696	0.0024572
ZEB1-AS1	4.17087e-05	1.2686	0.905	0.609	0.00921761
DLX6-AS1	4.99564e-07	1.24313	0.952	0.609	0.000110404
DTX2P1-UPK3BP1-PMS2P11	7.55659e-05	1.20888	1	0.913	0.0167001
POLR2J4	4.21816e-05	1.18995	1	0.957	0.00932213
LINC01011	1.09252e-06	1.11315	0.952	0.304	0.000241447
LINC00887	3.10667e-08	1.10841	0.976	0.565	6.86573e-06
RBPMS-AS1	0.000153068	0.970323	0.786	0.261	0.0338281
TMPO-AS1	0.000118382	0.874605	0.786	0.304	0.0261625
WEE2-AS1	6.64267e-06	0.82792	0.833	0.261	0.00146803

## Sheet: Table S2
Table S2. LncRNA ranks in follicles during PFA.
Rank	lncRNA name
1	CASC8
2	FGD5-AS1
3	CYP1B1-AS1
4	MRVI1-AS1
5	MALAT1
6	AFAP1-AS1
7	SNHG14
8	PITPNA-AS1
9	LINC00707
10	LOXL1-AS1
11	SSTR5-AS1
12	LIPE-AS1
13	MAPKAPK5-AS1
14	OIP5-AS1
15	LINC00665
16	SNHG12
17	TRAF3IP2-AS1
18	TTC28-AS1
19	PRKCQ-AS1
20	CERS6-AS1
21	LINC00943
22	STX18-AS1
23	TEX41
24	TTN-AS1
25	SNHG1
26	LINC00937
27	EPB41L4A-AS1
28	LINC00511
29	PINK1-AS
30	CASC9
31	USP3-AS1
32	LINC00649
33	SNHG16
34	TUG1
35	LINC01011
36	SNHG15
37	LINC00963
38	SNHG6
39	ZFAS1
40	LIMD1-AS1
41	NPSR1-AS1
42	LINC00922
43	MAGI2-AS3
44	NOP14-AS1
45	GABPB1-AS1
46	LINC00847
47	DLEU2
48	SNHG17
49	CKMT2-AS1
50	SNHG5
51	DANCR
52	CBR3-AS1
53	RUSC1-AS1
54	CRNDE
55	JPX
56	POLR2J4
57	LINC00467
58	SLC8A1-AS1
59	GAS5
60	LINC01001
61	ARHGEF26-AS1
62	UGDH-AS1
63	SRP14-AS1
64	PTPRG-AS1
65	TRIM52-AS1
66	ZNF503-AS1
67	PROSER2-AS1
68	RNF144A-AS1
69	LINC01006
70	TP53TG1
71	SNHG7
72	NPPA-AS1
73	PCAT1
74	FER1L6-AS2
75	USP2-AS1
76	ST8SIA6-AS1
77	ENTPD3-AS1
78	LINC00485
79	GNG12-AS1
80	BDNF-AS
81	SBF2-AS1
82	LINC00882
83	SNHG8
84	MIR4500HG
85	TEN1-CDK3
86	MIR22HG
87	LINC00887
88	PAXIP1-AS1
89	ZBED5-AS1
90	LINC00491
91	FAM157C

## Sheet: Table S3
Table S3. 725 KEGG subpathways identified by k-clique algorithm.
Glycolysis / Gluconeogenesis (00010_1)	ALDOA	ALDOB	ALDOC	GAPDH	GAPDHS	TPI1	PFKL	PFKM	PFKP	FBP1	FBP2	GPI	PGM1	PGM2	HK1	HK2	HK3	HKDC1	GCK	G6PC	G6PC2	G6PC3	ADPGK
Glycolysis / Gluconeogenesis (00010_2)	ALDH2	ALDH1B1	ALDH9A1	ALDH3A2	ALDH7A1	ALDH3A1	ALDH1A3	ALDH3B1	ALDH3B2	AKR1A1	ADH1A	ADH1B	ADH1C	ADH4	ADH5	ADH6	ADH7	PDHA1	PDHA2	PDHB	DLAT	DLD	ACSS2	ACSS1
Glycolysis / Gluconeogenesis (00010_5)	PDHA1	PDHA2	PDHB	LDHAL6A	LDHA	LDHB	LDHC	LDHAL6B	PKLR	PKM	ENO1	ENO2	ENO3	ENO4	PGAM4	PGAM1	PGAM2	BPGM	PGK1	PGK2	PCK1	PCK2	MINPP1
Glycolysis / Gluconeogenesis (00010_6)	ALDOA	ALDOB	ALDOC	ENO1	ENO2	ENO3	ENO4	PGAM4	PGAM1	PGAM2	BPGM	GAPDH	GAPDHS	TPI1	PGK1	PGK2	MINPP1
Citrate cycle (TCA cycle) (00020_1)	DLD	OGDH	OGDHL	DLST	SUCLG2	SUCLG1	SUCLA2	IDH1	IDH2	IDH3A	IDH3B	IDH3G
Citrate cycle (TCA cycle) (00020_4)	OGDH	OGDHL	IDH1	IDH2	IDH3A	IDH3B	IDH3G	ACLY	ACO1	ACO2	CS
Citrate cycle (TCA cycle) (00020_5)	ACLY	FH	ACO1	ACO2	CS	MDH1	MDH2	PC	PDHA1	PDHA2	PDHB	DLD	DLAT	PCK1	PCK2
Citrate cycle (TCA cycle) (00020_6)	DLD	OGDH	OGDHL	DLST	SUCLG2	SUCLG1	SUCLA2	FH	SDHA	SDHB	SDHC	SDHD
Pentose phosphate pathway (00030_2)	GPI	DERA	PRPS1L1	PRPS1	PRPS2	PGM2	RBKS	TKT	TKTL1	TKTL2	RPIA	RPE	RPEL1	ALDOA	ALDOB	ALDOC	PFKL	PFKM	PFKP	FBP1	FBP2	PGD	PGLS	G6PD	IDNK	TALDO1	PGM1	H6PD
Pentose and glucuronate interconversions (00040_3)	RPE	RPEL1	XYLB	DCXR	AKR1B1	AKR1B10	DHDH	SORD
Fructose and mannose metabolism (00051_1)	AKR1B1	AKR1B10	SORD	KHK	HK1	HK2	HK3	HKDC1	PFKFB1	PFKFB2	PFKFB3	PFKFB4	TIGAR	MPI	PMM1	PMM2	PFKL	PFKM	PFKP	TPI1	ALDOA	ALDOB	ALDOC	TKFC	FBP1	FBP2
Galactose metabolism (00052_2)	AKR1B1	AKR1B10	GLA	GCK	HK1	HK2	HK3	HKDC1	LCT	GLB1	PGM1	PGM2	B4GALT1	LALBA	B4GALT2	GALE	UGP2	GALT	G6PC	G6PC2	G6PC3	GALK1	GALM
Fatty acid biosynthesis (00061_2)	FASN	OLAH	OXSM	MCAT	ACACA	ACACB	ACSL1	ACSL3	ACSL4	ACSBG1	ACSL6	ACSL5	ACSBG2
Fatty acid elongation (00062_8)	HSD17B12	TECR	HACD2	HACD4	HACD3	HACD1	ACOT2	ACOT7	THEM4	ACOT4	THEM5	ACOT1	ELOVL2	ELOVL5	ELOVL1	ELOVL4	ELOVL6	ELOVL7	ELOVL3
Fatty acid elongation (00062_9)	ECHS1	HADHA	HADH	ACAA2	HADHB	MECR	PPT1	PPT2
Fatty acid degradation (00071_1)	ACADSB	ACADS	EHHADH	HADH	ECHS1	HADHA	ACADM	ACAT1	ACAT2	ACAA2	ACAA1	HADHB	ACADL	GCDH	ACOX1	ACOX3	ACADVL
Steroid biosynthesis (00100_2)	EBP	DHCR7	SC5D	DHCR24	CEL	LIPA	SOAT1	SOAT2
Steroid biosynthesis (00100_6)	DHCR24	LSS	TM7SF2	MSMO1	CYP51A1	SQLE
Steroid biosynthesis (00100_7)	DHCR24	TM7SF2	NSDHL	MSMO1	CYP51A1	HSD17B7
Primary bile acid biosynthesis (00120_1)	CYP46A1	CYP7B1	CYP7A1	AKR1D1	CH25H	CYP27A1	HSD3B7	CYP8B1	CYP39A1
Primary bile acid biosynthesis (00120_9)	AMACR	ACOX2	HSD17B4	SCP2
Primary bile acid biosynthesis (00120_11)	SCP2	SLC27A5	BAAT	ACOX2	HSD17B4	ACOT8
Primary bile acid biosynthesis (00120_19)	SLC27A5	CYP27A1	AMACR	ACOX2	HSD17B4
Steroid hormone biosynthesis (00140_10)	CYP11A1	HSD3B1	HSD3B2	CYP17A1	SULT2B1	STS	CYP1A1	CYP1A2	CYP3A7	CYP3A5	AKR1C3	CYP21A2	CYP11B1	CYP11B2	HSD17B3	HSD17B2	HSD17B8	HSD17B6	HSD11B1	AKR1C4	AKR1D1	SRD5A1	SRD5A2	SRD5A3	CYP19A1	UGT2B11	UGT2A1	UGT2B28	UGT1A10	UGT1A8	UGT1A7	UGT1A6	UGT1A5	UGT1A9	UGT1A4	UGT1A1	UGT1A3	UGT2A2	UGT2B4	UGT2B7	UGT2B10	UGT2B15	UGT2B17	UGT2A3	AKR1C1	CYP7A1	CYP2E1	CYP3A4
Arginine biosynthesis (00220_2)	GLS2	GLS	GLUL	CPS1	OTC	ASS1	ARG1	ARG2	NAGS	ACY1	NOS1	NOS2	NOS3	GLUD1	GLUD2	GOT1	GOT2	GPT	GPT2
Purine metabolism (00230_1)	RRM2B	RRM1	RRM2	XDH	ATIC	PDE10A	PDE11A	PDE1A	PDE1C	PDE2A	PDE3A	PDE3B	PDE1B	ENTPD8	ENTPD1	ENTPD3	AK7	AK8	AK1	AK2	AK4	AK9	AK5	ADSL	ADSSL1	ADSS	AMPD1	AMPD2	AMPD3	NT5C3B	NT5C2	NT5C	NT5E	NT5C3A	NT5M	NT5C1A	NT5C1B	ADK	APRT	PNP	ADA	ADA2	NME6	NME7	NME1	NME2	NME3	NME4	NME1-NME2
Purine metabolism (00230_5)	PRPS1L1	PRPS1	PRPS2	PPAT	GART	PGM2	NUDT5	NUDT9	ADPRM	PGM1
Purine metabolism (00230_6)	GART	ATIC	ADSL	PAICS	APRT
Caffeine metabolism (00232_1)	CYP1A2	XDH	NAT2	NAT1	CYP2A6
Alanine, aspartate and glutamate metabolism (00250_1)	NIT2	ASNS	NAT8L	IL4I1	GOT1	GOT2	DDO	ASS1	ADSSL1	ADSS	ASL	ADSL	CAD	ASPA	RIMKLA	RIMKLB	FOLH1
Alanine, aspartate and glutamate metabolism (00250_3)	ALDH5A1	GLUD1	GLUD2	ABAT	GAD1	GAD2	GLUL	GLS2	GLS	CAD	CPS1	NIT2	ALDH4A1	GFPT1	GFPT2	PPAT
Glycine, serine and threonine metabolism (00260_1)	SRR	AGXT	GAMT	DMGDH	CBS	CTH	GATM	PSAT1	PIPOX	SARDH	PSPH	SHMT1	SHMT2	DAO	GCAT	SDS	SDSL	GLDC	ALAS1	ALAS2	GRHPR	AMT	DLD	GNMT	AGXT2
Glycine, serine and threonine metabolism (00260_2)	CHDH	ALDH7A1	BHMT	DMGDH	PIPOX	SARDH	GNMT
Glycine, serine and threonine metabolism (00260_5)	SRR	AGXT	PHGDH	CBS	PSAT1	PSPH	SHMT1	SHMT2	SDS	SDSL	GRHPR	GLYCTK	PGAM4	PGAM1	PGAM2	BPGM
Cysteine and methionine metabolism (00270_3)	TAT	ADI1	APIP	MRI1	MTAP	SRM	AMD1	MAT2B	MAT1A	MAT2A	IL4I1	ENOPH1	SMS
Cysteine and methionine metabolism (00270_6)	TAT	CTH	CBS	MTR	BHMT	MAT2B	MAT1A	MAT2A	AHCYL1	AHCY	AHCYL2	DNMT1	DNMT3A	DNMT3B	IL4I1	BHMT2	CDO1	GOT1	GOT2	BCAT1	BCAT2	AGXT2
Cysteine and methionine metabolism (00270_8)	CTH	CBS	MTR	BHMT	AHCYL1	AHCY	AHCYL2	BHMT2	CDO1	GOT1	GOT2	MPST	TST	LDHAL6A	LDHA	LDHB	LDHC	LDHAL6B	BCAT1	BCAT2	AGXT2	GCLC	GCLM
Valine, leucine and isoleucine degradation (00280_2)	DLD	BCKDHA	BCKDHB	BCAT1	BCAT2	ACADSB	ACADM	DBT	ACADS	ACAD8
Valine, leucine and isoleucine degradation (00280_3)	DLD	BCKDHA	BCKDHB	AUH	MCCC1	MCCC2	ECHS1	EHHADH	HADHA	IVD	DBT	ACADM
Valine, leucine and isoleucine degradation (00280_7)	ACAT1	ACAT2	HMGCS1	HMGCS2	OXCT1	OXCT2	HMGCL	HMGCLL1	AUH	ACAA2	ACAA1	HADHB	EHHADH	HADH	ECHS1	HADHA	MCEE	PCCA	PCCB	AOX1	ALDH2	ALDH1B1	ALDH9A1	ALDH3A2	ALDH7A1	ALDH6A1	ABAT	HSD17B10	HIBADH	AACS	AGXT2
Valine, leucine and isoleucine degradation (00280_10)	EHHADH	HADH	ACADSB	AOX1	ALDH2	ALDH1B1	ALDH9A1	ALDH3A2	ALDH7A1	ALDH6A1	ABAT	HIBADH	HIBCH	ECHS1	HADHA	ACADM	ACADS	ACAD8	AGXT2
Lysine degradation (00310_3)	AASS	ALDH7A1	AADAT	OGDH	OGDHL	DLST	PHYKPL
Lysine degradation (00310_6)	CAMKMT	EHMT2	PRDM7	EZH1	EZH2	SETD1B	SETD2	KMT5A	KMT2A	KMT5B	NSD3	ASH1L	KMT2E	PRDM9	KMT2C	SETMAR	NSD1	SUV39H1	NSD2	PRDM2	SUV39H2	EHMT1	KMT2D	SETD7	SETDB2	SETD3	DOT1L	KMT5C	PRDM6	SETD1A	KMT2B	SETDB1	COLGALT2	COLGALT1	PLOD3	PLOD1	PLOD2
Arginine and proline metabolism (00330_1)	ARG1	ARG2	GATM	GAMT	CKB	CKM	CKMT1B	CKMT2	CKMT1A	AZIN2	AGMAT	NOS1	NOS2	NOS3	OAT	ODC1
Arginine and proline metabolism (00330_5)	ARG1	ARG2	AOC1	ALDH2	ALDH1B1	ALDH9A1	ALDH3A2	ALDH7A1	SRM	AMD1	SMS	SAT2	SAT1	MAOA	MAOB	GATM	AZIN2	AGMAT	SMOX	NOS1	NOS2	NOS3	OAT	ALDH4A1	ALDH18A1	ODC1
Arginine and proline metabolism (00330_6)	ARG1	ARG2	OAT	PYCR2	PYCR1	PYCR3	ALDH4A1	ALDH18A1	PRODH	ODC1
Arginine and proline metabolism (00330_11)	PYCR2	PYCR1	PYCR3	PRODH	P4HA3	P4HA1	P4HA2	PRODH2	ALDH4A1	GOT1	GOT2	LAP3
Histidine metabolism (00340_5)	HAL	CNDP2	CARNS1	ALDH2	ALDH1B1	ALDH9A1	ALDH3A2	ALDH7A1	MAOA	MAOB	ALDH3A1	ALDH1A3	ALDH3B1	ALDH3B2	AOC1	HNMT	CNDP1	HDC
Tyrosine metabolism (00350_2)	FAHD1	GSTZ1	HGD	HPD	FAH
Tyrosine metabolism (00350_6)	MAOA	MAOB	ALDH3A1	ALDH1A3	ALDH3B1	ALDH3B2	COMT	LRTOMT	ADH1A	ADH1B	ADH1C	ADH4	ADH5	ADH6	ADH7	PNMT	DBH	DDC	AOC2	AOC3
Tyrosine metabolism (00350_8)	TPO	GOT1	GOT2	TYR	IL4I1	TAT	DDC	MAOA	MAOB	COMT	LRTOMT	PNMT	DBH	ALDH3A1	ALDH1A3	ALDH3B1	ALDH3B2	TH	AOC2	AOC3
Tryptophan metabolism (00380_2)	EHHADH	HADH	ACAT1	ACAT2	ECHS1	HADHA	GCDH	OGDH	OGDHL
Tryptophan metabolism (00380_5)	IDO2	IDO1	CYP1A1	CYP1A2	CYP1B1	ASMT	AANAT	DDC	TPH2	TPH1	MAOA	MAOB	ALDH2	ALDH1B1	ALDH9A1	ALDH3A2	ALDH7A1	AOX1	INMT
Tryptophan metabolism (00380_8)	IDO2	IDO1	IL4I1	DDC	AFMID	KYNU	KMO	TDO2	TPH2	TPH1	AADAT	KYAT3	KYAT1	MAOA	MAOB	AOC1	INMT
beta-Alanine metabolism (00410_3)	ALDH6A1	ABAT	CARNS1	GAD1	GAD2	GADL1	SMS	SRM	AOC2	AOC3	ALDH2	ALDH1B1	ALDH9A1	ALDH3A2	ALDH7A1	UPB1	DPYS	CNDP1	ALDH3A1	ALDH1A3	ALDH3B1	ALDH3B2	CNDP2	SMOX
Taurine and hypotaurine metabolism (00430_1)	CSAD	GAD1	GAD2	GGT6	GGT1	GGT7	GGT5	BAAT
Taurine and hypotaurine metabolism (00430_2)	CDO1	ADO	GADL1	CSAD	GAD1	GAD2
Selenocompound metabolism (00450_1)	TXNRD2	TXNRD3	TXNRD1	SEPHS2	SEPHS1	PSTK	SEPSECS	SCLY
Selenocompound metabolism (00450_2)	MARS	MARS2	KYAT3	KYAT1	CTH	MTR	TXNRD2	TXNRD3	TXNRD1
Glutathione metabolism (00480_2)	ANPEP	GGT6	GGT1	GGT7	GGT5	GPX6	GPX1	GPX2	GPX3	GPX5	GPX7	GPX8	GPX4	TXNDC12	G6PD	IDH1	IDH2	GSS	GCLC	GCLM	OPLAH	GGCT	GSTO2	GSTA5	HPGDS	GSTA1	GSTA2	GSTA3	GSTA4	GSTM1	GSTM2	GSTM3	GSTM4	GSTM5	GSTP1	GSTT1	GSTT2	GSTK1	MGST1	MGST2	MGST3	GSTT2B	GSTO1	GSR	PGD	LAP3	CHAC2	CHAC1
Starch and sucrose metabolism (00500_3)	ENPP1	ENPP3	PGM2L1	UGP2	GYG1	GYS1	GYS2	GYG2	PGM1	PGM2	G6PC	G6PC2	G6PC3	HK1	HK2	HK3	HKDC1	GCK	GPI	GBE1	AMY1A	AMY1B	AMY1C	AMY2A	AMY2B	MGAM	GAA	GANC	AGL	PYGB	PYGL	PYGM	SI
N-Glycan biosynthesis (00510_5)	MGAT5B	MGAT5	FUT8	B4GALT1	B4GALT3	B4GALT2	ST6GAL1	ST6GAL2	MGAT3	MGAT2	MAN2A2	MAN2A1	MGAT4B	MGAT4A
N-Glycan biosynthesis (00510_7)	MAN1A2	MAN1B1	MAN1A1	MAN1C1	GANAB	MOGS	STT3B	STT3A	DAD1	DDOST	RPN1	RPN2	TUSC3
N-Glycan biosynthesis (00510_8)	FUT8	MGAT3	MGAT2	MAN2A2	MAN2A1	MAN1A2	MAN1B1	MAN1A1	MAN1C1	MGAT4B	MGAT4A	MGAT1
N-Glycan biosynthesis (00510_10)	ALG14	DPM3	DPM2	ALG6	ALG3	DOLPP1	MOGS	STT3B	STT3A	ALG5	ALG1	ALG13	DPM1	DPAGT1	DOLK	DAD1	DDOST	RPN1	RPN2	TUSC3	ALG8	ALG10B	ALG10
Mucin type O-glycan biosynthesis (00512_1)	GCNT3	GCNT1	B4GALT5	ST6GALNAC1	B3GNT6	GALNT6	GALNT5	GALNT13	GALNT15	GALNTL5	GALNT1	GALNT2	GALNT3	GALNT8	GALNT18	GALNTL6	GALNT9	GALNT7	GALNT10	GALNT16	GALNT11	GALNT17	GALNT14	GALNT12	GALNT4
Mannose type O-glycan biosynthesis (00515_1)	POMT1	POMT2	POMGNT1	MGAT5B	POMGNT2
Amino sugar and nucleotide sugar metabolism (00520_2)	NAGK	PGM3	UAP1	UAP1L1	GNE	GNPDA1	GNPDA2	AMDHD2	GFPT1	GFPT2	GNPNAT1	NANS	RENBP	HEXA	HEXB	CHIT1	CHIA	NPL	HK1	HK2	HK3	HKDC1
Amino sugar and nucleotide sugar metabolism (00520_4)	GALT	GALE	UGDH	UXS1	PGM1	PGM2	HK1	HK2	HK3	HKDC1	GPI	UGP2	GCK
Amino sugar and nucleotide sugar metabolism (00520_7)	GNPDA1	GNPDA2	AMDHD2	GFPT1	GFPT2	GNPNAT1	HK1	HK2	HK3	HKDC1	MPI	PMM1	PMM2	PGM1	PGM2	GMPPB	GMPPA	GPI	GCK
Glycosaminoglycan degradation (00531_1)	SGSH	HPSE2	HPSE	IDS	IDUA	HGSNAT
Glycosaminoglycan degradation (00531_2)	GNS	GALNS	GLB1	HEXA	HEXB
Glycosaminoglycan degradation (00531_3)	IDS	IDUA	ARSB	HYAL4	HYAL1	SPAM1	HYAL3	HYAL2
Glycosaminoglycan biosynthesis - chondroitin sulfate / dermatan sulfate (00532_1)	B3GAT3	CHSY1	CHSY3	CSGALNACT2	CSGALNACT1	CHPF	CHPF2	B3GALT6
Glycosaminoglycan biosynthesis - chondroitin sulfate / dermatan sulfate (00532_2)	B3GAT3	XYLT1	XYLT2	B4GALT7	CSGALNACT2	CSGALNACT1	B3GALT6
Glycerolipid metabolism (00561_1)	CEL	PNLIPRP3	LIPC	PNLIP	PNLIPRP1	PNLIPRP2	PNPLA2	PNPLA3	LIPF	LIPG	MOGAT3	DGAT2	DGAT1	PLPP4	LPIN1	LPIN3	PLPP5	PLPP1	PLPP2	PLPP3	LPIN2	MOGAT1	MOGAT2	AGPAT1	AGPAT2	MBOAT2	MBOAT1	LCLAT1	AGPAT5	AGPAT3	AGPAT4	AGK	MGLL	GPAT4	GPAT2	GPAM	GPAT3	GK	GK2	AKR1B1	AKR1B10	ALDH2	ALDH1B1	ALDH9A1	ALDH3A2	ALDH7A1	AKR1A1	LPL	DGKK
Glycosylphosphatidylinositol (GPI)-anchor biosynthesis (00563_1)	PIGY	DPM2	PIGQ	PIGP	PIGH	PIGC	PIGX	PIGM	PIGL	PIGB	PIGN	PIGA	GPLD1	PIGW	PIGV
Glycerophospholipid metabolism (00564_6)	PTDSS2	PTDSS1	LPCAT3	LPCAT4	LPCAT2	LPCAT1	CEPT1	CHPT1	PCYT1A	PCYT1B	PCYT2	PLAAT3	PLA2G4B	PLA2G4E	PLB1	PLA2G4F	PLA2G2D	PLA2G4D	PLA2G2E	PLA2G2C	PLA2G3	PLA2G1B	PLA2G2A	PLA2G4A	PLA2G5	PLA2G2F	PLA2G12A	PLA2G6	PLA2G10	PLA2G12B	PLA2G4C	JMJD7-PLA2G4B	DGKK	DGKA	DGKB	DGKG	DGKH	DGKQ	DGKZ	DGKE	DGKD	DGKI	PLPP4	LPIN1	LPIN3	PLPP5	PLPP1	PLPP2	PLPP3
Arachidonic acid metabolism (00590_2)	EPHX2	CYP2B6	CYP2J2	CYP2C9	CYP2C8	ALOX15B	ALOX12B	CYP2U1	GPX6	GPX1	GPX2	GPX3	GPX5	GPX7	GPX8	CYP4F3	CYP4F2	CYP4A11	ALOX12	ALOX15	PTGS1	PTGS2	PLA2G4B	PLAAT3	PLA2G4E	PLB1	PLA2G4F	PLA2G2D	PLA2G4D	PLA2G2E	PLA2G2C	PLA2G3	PLA2G1B	PLA2G2A	PLA2G4A	PLA2G5	PLA2G2F	PLA2G12A	PLA2G6	PLA2G10	PLA2G12B	PLA2G4C	JMJD7-PLA2G4B	ALOX5	PTGIS	PTGES3	PTGES2	PTGES	TBXAS1
Sphingolipid metabolism (00600_1)	ACER3	SGPP2	SGPP1	ASAH1	ASAH2	CERS1	CERS3	CERS6	CERS2	CERS4	CERS5	DEGS2	DEGS1	ENPP7	SMPD3	SMPD4	SMPD1	SMPD2	CERK	PLPP1	PLPP2	PLPP3	KDSR	GLA	GAL3ST1	NEU3	NEU4	NEU1	NEU2	UGT8	GLB1	GBA	GBA2	UGCG	ACER1	ACER2	SPHK2	SPHK1	SGPL1	GALC	ARSA	B4GALT6	SGMS2	SGMS1
Glycosphingolipid biosynthesis - lacto and neolacto series (00601_8)	B4GALT4	B4GALT3	B4GALT2	FUT4	FUT7	FUT3	FUT5	FUT6	ST8SIA1	ST3GAL6	FUT9	B3GNT3	B3GNT2	B3GNT4	B4GALT1	ABO	FUT1	FUT2	B3GNT5	B3GALT1	B3GALT2	B3GALT5	ST3GAL3	ST3GAL4	A4GALT	B3GALNT1
Glycosphingolipid biosynthesis - globo and isoglobo series (00603_1)	ST3GAL1	ST3GAL2	B3GALT5	NAGA	A4GALT	HEXA	HEXB	FUT1	FUT2	GLA	B3GALNT1	GBGT1	NA
Glycosphingolipid biosynthesis - ganglio series (00604_3)	GLB1	HEXA	HEXB	ST6GALNAC6	ST8SIA1	ST8SIA5	ST3GAL1	ST3GAL2	ST3GAL5	B3GALT4	B4GALNT1
Glycosphingolipid biosynthesis - ganglio series (00604_5)	ST8SIA5	ST6GALNAC3	ST6GALNAC4	ST3GAL5	B4GALNT1	B3GALT4	ST3GAL1	ST3GAL2	ST6GALNAC6	ST6GALNAC5
Pyruvate metabolism (00620_1)	PDHA1	PDHA2	PDHB	PCK1	PCK2	PKLR	PKM	GLO1	LDHD	HAGH	PC	ME2	ME3	ME1	MDH1	MDH2	LDHAL6A	LDHA	LDHB	LDHC	LDHAL6B	FH
Pyruvate metabolism (00620_2)	PDHA1	PDHA2	PDHB	ACSS2	ACSS1	ACOT12	ALDH2	ALDH1B1	ALDH9A1	ALDH3A2	ALDH7A1	ACAT1	ACAT2	ACACA	ACACB	DLAT	DLD	ACYP1	ACYP2
Glyoxylate and dicarboxylate metabolism (00630_1)	HYI	HOGA1	HAO2	HAO1	GRHPR	PGP	AGXT	SHMT1	SHMT2	DLD	GCSH	GLDC	AMT	GLYCTK
Propanoate metabolism (00640_1)	ALDH6A1	ACACA	ACACB	MLYCD	ABAT	ACAT1	ACAT2
Propanoate metabolism (00640_3)	ALDH6A1	MCEE	PCCA	PCCB	ECHDC1	ACSS3	ACSS2	ACSS1	ECHS1	EHHADH	HADHA	ACADM	MMUT	DLD	BCKDHA	BCKDHB	DBT
Propanoate metabolism (00640_4)	ALDH6A1	PCCA	PCCB	ECHDC1	ACSS3	ACSS2	ACSS1	LDHAL6A	LDHA	LDHB	LDHC	LDHAL6B	ACADM	DLD	BCKDHA	BCKDHB	DBT
Propanoate metabolism (00640_5)	ALDH6A1	MCEE	PCCA	PCCB	ECHDC1	ACSS3	ACSS2	ACSS1	ACADM	MMUT	SUCLG2	SUCLG1	SUCLA2	DBT
Butanoate metabolism (00650_3)	OXCT1	OXCT2	AACS	HMGCS1	HMGCS2	ACAT1	ACAT2	EHHADH	HADH	ECHS1	HADHA	ACADS	ACSM1	ACSM2A	ACSM6	ACSM4	ACSM2B	ACSM5	ACSM3
One carbon pool by folate (00670_1)	FTCD	GART	MTHFD2	MTHFD2L	DHFR	DHFR2	MTHFR	MTHFD1	MTHFS	AMT	MTFMT	ALDH1L1	ALDH1L2	MTHFD1L	ATIC	TYMS	MTR	SHMT1	SHMT2
Thiamine metabolism (00730_1)	THTPA	AK7	AK8	AK1	AK2	AK4	AK5	NTPCR	TPK1	ALPI	ALPL	ALPP	ALPG	ACP1
Riboflavin metabolism (00740_1)	FLAD1	RFK	BLVRB	ENPP1	ENPP3	ACP1	ACP2	ACP5
Vitamin B6 metabolism (00750_1)	AOX1	PNPO	PHOSPHO2	PDXP	PDXK
Nicotinate and nicotinamide metabolism (00760_2)	NUDT12	QPRT	ENPP1	ENPP3	NMRK2	NMRK1	NMNAT2	NMNAT3	NMNAT1	NADSYN1	NAPRT	PNP	NAMPT	BST1	CD38	NNMT	NADK2	NADK	NNT	NT5C3B	NT5C2	NT5C	NT5E	NT5C3A	NT5M	NT5C1A	NT5C1B
Pantothenate and CoA biosynthesis (00770_2)	COASY	ENPP1	ENPP3	PANK1	PANK4	PANK3	PANK2	PPCDC	VNN2	VNN1	AASDHPPT	PPCS
Folate biosynthesis (00790_2)	QDPR	GCH1	ALPI	ALPL	ALPP	ALPG	PTS	PCBD1	PCBD2	PAH	TH	TPH2	TPH1	SPR	DHFR	DHFR2	AKR1B1	AKR1B10	CBR1	AKR1C3
Folate biosynthesis (00790_8)	MOCS2	MOCS1	GPHN	MOCOS
Retinol metabolism (00830_2)	ADH1A	ADH1B	ADH1C	ADH4	ADH5	ADH6	ADH7	BCO1	ALDH1A1	ALDH1A2	AOX1	LRAT	RETSAT	RPE65	CYP26A1	CYP26C1	CYP26B1	CYP3A7	CYP3A4	CYP3A5	CYP1A1	CYP1A2	RDH12	RDH10	RDH8	RDH11	RDH16	DHRS9	DHRS4	DHRS4L2	DHRS4L1	DHRS3	CYP2A6	CYP2B6	CYP2S1	CYP4A11	CYP2C8	CYP2C9	CYP2C18	UGT2B11	UGT2A1	UGT2B28	UGT1A10	UGT1A8	UGT1A7	UGT1A6	UGT1A5	UGT1A9	UGT1A4
Porphyrin and chlorophyll metabolism (00860_2)	GUSB	UGT2B11	UGT2A1	UGT2B28	UGT1A10	UGT1A8	UGT1A7	UGT1A6	UGT1A5	UGT1A9	UGT1A4	UGT1A1	UGT1A3	UGT2A2	UGT2B4	UGT2B7	UGT2B10	UGT2B15	UGT2B17	UGT2A3	BLVRA	BLVRB	HMOX1	HMOX2
Porphyrin and chlorophyll metabolism (00860_3)	CPOX	HCCS	COX10	FECH	CP	FXN	HEPH	PPOX	COX15
Porphyrin and chlorophyll metabolism (00860_6)	CPOX	UROD	UROS	HMBS	ALAD	PPOX
Porphyrin and chlorophyll metabolism (00860_7)	UROD	UROS	HMBS	ALAD	ALAS1	ALAS2
Terpenoid backbone biosynthesis (00900_1)	MVK	ACAT1	ACAT2	HMGCS1	HMGCS2	HMGCR	PMVK
Terpenoid backbone biosynthesis (00900_5)	IDI1	IDI2	MVD	FDPS	GGPS1	NUS1	DHDDS	PDSS1	PDSS2	FNTA	FNTB	RCE1	ICMT	ZMPSTE24
Sulfur metabolism (00920_1)	SUOX	BPNT1	IMPAD1	PAPSS2	PAPSS1	MPST	TST	CYCS	SQOR	ETHE1
Metabolism of xenobiotics by cytochrome P450 (00980_9)	CYP1B1	EPHX1	SULT2A1	CYP2B6	CYP1A1
Metabolism of xenobiotics by cytochrome P450 (00980_11)	HSD11B1	AKR1C1	CBR1	CBR3	CYP2A6	CYP1A1	CYP2A13	CYP2D6	CYP2E1	CYP3A4
Drug metabolism - cytochrome P450 (00982_2)	FMO1	FMO2	FMO3	FMO4	FMO5	CYP3A4	CYP2D6	CYP2C9
Drug metabolism - cytochrome P450 (00982_10)	CYP3A4	CYP2D6	CYP2C19	MAOA	MAOB	AOX1
Drug metabolism - other enzymes (00983_2)	NAT2	NAT1	MPO	CYP2E1	CES1	GSTO2	GSTA5	GSTA1	GSTA2	GSTA3	GSTA4	GSTM1	GSTM2	GSTM3	GSTM4	GSTM5	GSTP1	GSTT1	GSTT2	MGST1	MGST2	MGST3	GSTT2B	GSTO1
EGFR tyrosine kinase inhibitor resistance (01521_4)	ERBB3	ERBB2	EGFR	GAB1	TGFA	GRB2	SHC2	SHC4	SHC3	SHC1	PRKCA	PRKCB	PRKCG	PLCG1	PLCG2	PIK3CA	PIK3CB	PIK3CD	PIK3R1	PIK3R2	PIK3R3	EGF	MET	IGF1R	PDGFRA	PDGFRB	KDR	HGF	FGFR3	FGFR2	STAT3	JAK1	JAK2	IGF1	VEGFA	PDGFA	PDGFB	PDGFC	PDGFD	FGF2	SRC	GAS6	AXL	IL6	IL6R	NRG1	NRG2
EGFR tyrosine kinase inhibitor resistance (01521_9)	MAPK1	MAPK3	MAP2K1	MAP2K2	ARAF	RAF1	BRAF	BCL2	BAX	BCL2L1	BCL2L11
Endocrine resistance (01522_2)	ESR1	ESR2	CARM1	MED1	NCOA3	PRKACA	PRKACB	PRKACG	HRAS	KRAS	NRAS	ARAF	RAF1	BRAF	MAP2K1	MAP2K2	GNAS	ADCY1	ADCY2	ADCY3	ADCY5	ADCY6	ADCY7	ADCY8	ADCY9	ADCY4	MAPK14	MAPK11	MAPK13	MAPK12	MAPK8	MAPK9	MAPK10	MTOR	RPS6KB1	RPS6KB2	FOS	JUN	SP1	SRC
Endocrine resistance (01522_14)	BCL2	BIK	BAD	BAX
Platinum drug resistance (01524_1)	ATM	TP53	CASP9	CASP3	BIRC2	BIRC3	XIAP	BIRC5	APAF1	CYCS	BID	CASP8	FADD	AKT3	AKT1	AKT2	CDKN1A	MAP3K5
Platinum drug resistance (01524_2)	ATM	TP53	CASP9	CASP3	BIRC2	BIRC3	XIAP	BIRC5	BID	CASP8	FADD	FAS	BAX	BAK1	PMAIP1	BBC3	MDM2	CDKN1A
Platinum drug resistance (01524_4)	BCL2	CASP9	CASP3	BAD	BIRC2	BIRC3	XIAP	BIRC5	APAF1	CYCS	BCL2L1	PIK3CA	PIK3CB	PIK3CD	PIK3R1	PIK3R2	PIK3R3	PDPK1	AKT3	AKT1	AKT2	MAPK1	MAPK3	CDKN1A	MAP3K5
RNA transport (03013_2)	RAN	XPO1	NCBP2	NCBP1	PHAX	NXF1	NXF5	NXF3	NXF2	NXF2B	NUP214	NUP88	NUP42
RNA transport (03013_3)	GEMIN2	SMN1	SMN2	DDX20	GEMIN5	GEMIN4	GEMIN7	GEMIN8	STRAP	GEMIN6
RNA transport (03013_8)	XPO1	RBM8A	MAGOH	MAGOHB	EIF4A3	SAP18	NXF1	NXF5	NXF3	NXF2	NXF2B	ALYREF	NXT1	NXT2	NUP98	RAE1	NUP42	DDX39B	THOC1	THOC5	UPF2	UPF3B	UPF3A
RNA transport (03013_13)	NUP98	NUP37	SEC13	NUP160	NUP107	NUP85	SEH1L	NUP43	NUP133
RNA transport (03013_14)	RGPD4	RGPD1	RANBP2	RGPD3	RGPD8	RGPD2	RGPD5	UBE2I	RANGAP1	SUMO4	SUMO3	SUMO2	SUMO1
RNA transport (03013_18)	EIF1	EIF1B	EIF1AX	EIF1AY	EIF3E	EIF3CL	EIF3A	EIF3B	EIF3C	EIF3D	EIF3F	EIF3G	EIF3H	EIF3I	EIF3J	EIF2S1	EIF2S3	EIF2S2	EIF5	EIF2B1	EIF2B4	EIF2B3	EIF2B2	EIF2B5
RNA transport (03013_20)	PABPC4L	PABPC5	PABPC1	PABPC1L2A	PABPC3	PABPC1L2B	PABPC1L	PABPC4	PAIP1	EIF4A1	EIF4A2	EIF4E	EIF4E1B	EIF4E2	EIF4G1	EIF4G2	EIF4G3	EIF4B
mRNA surveillance pathway (03015_2)	NCBP1	UPF1	UPF2	UPF3B	UPF3A	SMG1	SMG5	SMG7	SMG6	ETF1	GSPT2	GSPT1	NCBP2	PABPC4L	PABPC5	PABPC1	PABPC1L2A	PABPC3	PABPC1L2B	PABPC1L	PABPC4	PPP2R3B	PPP2R3C	PPP2CA	PPP2CB	PPP2R1A	PPP2R1B	PPP2R2A	PPP2R2B	PPP2R2C	PPP2R3A	PPP2R5A	PPP2R5B	PPP2R5C	PPP2R5D	PPP2R5E	PPP2R2D
mRNA surveillance pathway (03015_5)	FIP1L1	CPSF3	CPSF2	CPSF1	CPSF4	WDR33	WDR82	PPP1CA	PPP1CB	PPP1CC	SSU72
mRNA surveillance pathway (03015_6)	CSTF1	CSTF2	CSTF2T	CSTF3	SYMPK
RNA degradation (03018_1)	CNOT7	CNOT8	TOB1	TOB2	BTG3	BTG4	BTG1	BTG2	PABPC4L	PABPC5	PABPC1	PABPC1L2A	PABPC3	PABPC1L2B	PABPC1L	PABPC4	PAN2	PAN3
PPAR signaling pathway (03320_1)	AQP7	GK	GK2	PCK1	PCK2	PLIN2	PLIN5	PLIN1	PLIN4	PPARA	RXRA	RXRB	RXRG	PPARD	PPARG	SCP2	ACAA1	ACADM	ACADL	EHHADH	CPT2	CPT1C	CPT1A	CPT1B	ACSL1	ACSL3	ACSL4	ACSBG1	ACSL6	ACSL5	ACSBG2	OLR1	LPL	CD36	FABP3	CYP7A1	SLC27A4	SLC27A1	HMGCS2	SORBS1	MMP1	FABP4	ANGPTL4	ACOX1	ACOX2	ACOX3	ILK	FABP1	PDPK1
Homologous recombination (03440_1)	SEM1	MRE11	RAD50	BRCA2	SYCP3	BRCA1	RBBP8	PALB2	ABRAXAS1	BRIP1	BARD1	TOPBP1	ATM	BABAM1
Homologous recombination (03440_3)	SEM1	BRCA2	BRCA1	RBBP8	PALB2	UIMC1	ABRAXAS1	BRIP1	BARD1	ATM	BABAM2	BABAM1	BRCC3
Fanconi anemia pathway (03460_5)	FANCM	FANCA	FANCB	FANCC	FANCD2	FANCI	FANCE	FANCF	FANCG	FANCL	FAAP100	BLM	RMI1	RMI2	TOP3A	TOP3B	ATRIP	ATR	BRCA2	MLH1	BRIP1	RAD51C	FAN1	USP1	WDR48	UBE2T	CENPX	CENPS	PMS2	RAD51	FAAP24	HES1
MAPK signaling pathway (04010_2)	RASGRF1	RASGRF2	MAP2K2	MAP2K1	RAF1	BRAF	RASA1	NF1	PRKCA	PRKCB	PRKCG	RAP1A	RAP1B	PRKACA	PRKACB	PRKACG	RAPGEF2	RASA2	RRAS2	MRAS	HRAS	KRAS	NRAS	RRAS	RASGRP1	RASGRP2	RASGRP4	RASGRP3	SOS1	SOS2	GNA12	GNG12	GRB2	CACNG3	CACNG2	CACNG5	CACNG4	CACNA2D3	CACNG8	CACNG7	CACNG6	CACNA1A	CACNA1B	CACNA1C	CACNA1D	CACNA1E	CACNA1F	CACNA1S	CACNA2D1
MAPK signaling pathway (04010_3)	DUSP10	DUSP1	DUSP2	DUSP4	DUSP5	DUSP6	DUSP7	DUSP8	DUSP9	DUSP16	DUSP3	PTPN7	PTPRR	PTPN5	MAP4K4	PLA2G4B	PLA2G4E	PLA2G4F	PLA2G4D	PLA2G4A	PLA2G4C	JMJD7-PLA2G4B	STMN1	MAPT	CHUK	IKBKB	IKBKG	MAP3K14	MAPK1	MAPK3	LAMTOR3	MAP2K2	MAP2K1	RAF1	BRAF	PRKCA	PRKCB	PRKCG	RAP1A	RAP1B	RRAS2	MRAS	HRAS	KRAS	NRAS	RRAS	TRAF2	CASP3	RAC1
MAPK signaling pathway (04010_5)	FASLG	PPP5D1	PPP5C	MAP2K6	MAP2K3	AKT3	AKT1	AKT2	MAP3K5	DAXX	TRAF2	TGFBR1	TGFBR2	FAS	TGFB1	TGFB2	TGFB3
MAPK signaling pathway (04010_6)	RASGRF1	RASGRF2	RAF1	BRAF	RASA1	NF1	PRKCA	PRKCB	PRKCG	RAPGEF2	RASA2	RRAS2	MRAS	HRAS	KRAS	NRAS	RRAS	RASGRP1	RASGRP2	RASGRP4	RASGRP3	SOS1	SOS2	GRB2	CSF1R	EGFR	EPHA2	ERBB2	ERBB3	ERBB4	FGFR1	FGFR3	FGFR2	FGFR4	FLT1	FLT3	FLT4	IGF1R	INSR	KDR	KIT	MET	NGFR	NTRK1	NTRK2	PDGFRA	PDGFRB	TEK	ARAF
MAPK signaling pathway (04010_11)	PPM1B	CHUK	IKBKB	IKBKG	MAP3K14	NLK	CDC25B	RPS6KA4	RPS6KA5	MAPKAPK3	MAPKAPK2	MEF2C	MAX	DDIT3	ELK4	TP53	ELK1	ATF2	MAPK14	MAPK11	MAPK13	MAPK12	PPP5D1	PPP5C	MAP2K6	MAP2K3	DUSP10	DUSP2	DUSP4	DUSP5	DUSP7	DUSP8	DUSP9	DUSP16	DUSP3	PTPN7	PTPRR	PTPN5	PPM1A	AKT3	AKT1	AKT2	TAOK3	TAOK1	TAOK2	MAP3K4	MAP3K7	MAP3K5	MAP3K6
MAPK signaling pathway (04010_12)	PPM1B	NFKB1	NFKB2	RELA	RELB	CHUK	IKBKB	IKBKG	MAP3K14	NLK	MAPK14	MAPK11	MAPK13	MAPK12	MAP2K6	MAP2K3	PPM1A	AKT3	AKT1	AKT2	TAOK3	TAOK1	TAOK2	MAP3K4	MAP3K7	MAP3K5	MAP3K6	MAP4K2	TAB2	TAB1	TRAF6	TRAF2	CD14	MAP2K4	MAPK8IP3	MAP3K1	MAP3K8	TRADD
MAPK signaling pathway (04010_15)	MAP4K4	NFKB1	NFKB2	RELA	RELB	CHUK	IKBKB	IKBKG	MAP3K14	MAPK1	MAPK3	LAMTOR3	MAP2K2	MAP2K1	RAF1	BRAF	PPM1A	AKT3	AKT1	AKT2	MAP3K7	MAP3K5	MAP4K2	STK3	STK4	TAB1	TRAF2	CASP3	RAC1	RAC2	RAC3	CDC42	PAK1	PAK2	MAP3K11	MAP2K7	MAPK8	MAPK9	MAPK10	MAP2K4	CRK	CRKL	ARRB1	ARRB2	MAPK8IP3	FLNA	FLNB	FLNC	MAP3K1
MAPK signaling pathway (04010_17)	TRAF6	IL1R1	IL1RAP	IL1A	IL1B	MYD88	IRAK1	IRAK4
MAPK signaling pathway (04010_21)	CHUK	IKBKB	IKBKG	CDC25B	RPS6KA4	RPS6KA5	MAPKAPK3	MAPKAPK2	MEF2C	MAX	DDIT3	ELK4	TP53	ELK1	ATF2	MAPK14	MAPK11	MAPK13	MAPK12	MAP2K6	MAP2K3	DUSP10	DUSP2	DUSP4	DUSP5	DUSP7	DUSP8	DUSP9	DUSP16	DUSP3	PTPN7	PTPRR	PTPN5	PPM1A	AKT3	AKT1	AKT2	MAP3K5	TRAF2	MAPKAPK5	MAPK8IP2	MAPK8IP1	MAP2K7	MAPK8	MAPK9	MAPK10	MAP2K4	CRK	CRKL
MAPK signaling pathway (04010_22)	MAP4K4	CHUK	IKBKB	IKBKG	MAP2K2	MAP2K1	TP53	ELK1	MAP2K6	MAP2K3	DUSP10	DUSP2	DUSP4	DUSP5	DUSP7	DUSP8	DUSP9	DUSP16	DUSP3	PTPN7	PTPRR	PTPN5	PPM1A	AKT3	AKT1	AKT2	MAP3K20	MAP3K12	MAP3K13	TRAF2	CASP3	RAC1	RAC2	RAC3	CDC42	MAPK8IP2	MAPK8IP1	MAP3K11	MAP2K7	MAPK8	MAPK9	MAPK10	MAP2K4	CRK	CRKL	ARRB1	ARRB2	MECOM	HSPA1A
ErbB signaling pathway (04012_5)	GRB2	ERBB4	ERBB3	STAT5A	STAT5B	ERBB2	GSK3B	CDKN1A	CDKN1B	MTOR	BAD	GAB1	NRG3	NRG2	SHC2	SHC4	SHC3	SHC1	HBEGF	NRG1	EREG	BTC	PIK3CA	PIK3CB	PIK3CD	PIK3R1	PIK3R2	PIK3R3	AKT3	AKT1	AKT2	NRG4
ErbB signaling pathway (04012_7)	GRB2	ERBB4	ERBB3	ERBB2	EGFR	PAK4	PAK1	PAK2	PAK3	PAK6	PAK5	NCK1	NCK2	STAT5A	STAT5B	GAB1	TGFA	CBL	CBLB	CRK	CRKL	PTK2	SOS1	SOS2	SHC2	SHC4	SHC3	SHC1	PRKCA	PRKCB	PRKCG	CAMK2A	CAMK2B	CAMK2D	CAMK2G	PLCG1	PLCG2	HBEGF	EREG	BTC	ABL1	ABL2	SRC	AREG	EGF
ErbB signaling pathway (04012_10)	PAK4	PAK1	PAK2	PAK3	PAK6	PAK5	NCK1	NCK2	MAP2K7	MAP2K4	ELK1	MAPK8	MAPK9	MAPK10	JUN
ErbB signaling pathway (04012_11)	GRB2	ERBB4	ERBB3	STAT5A	STAT5B	ERBB2	EGFR	NCK1	NCK2	TGFA	CBL	CBLB	NRG3	NRG2	CRK	CRKL	SOS1	SOS2	SHC2	SHC4	SHC3	SHC1	PLCG1	PLCG2	HBEGF	NRG1	EREG	BTC	PIK3CA	PIK3CB	PIK3CD	PIK3R1	PIK3R2	PIK3R3	SRC	NRG4	AREG	EGF	HRAS	KRAS	NRAS
Ras signaling pathway (04014_2)	MAPK1	MAPK3	MAP2K1	MAP2K2	RAF1	RRAS2	MRAS	HRAS	KRAS	NRAS	RRAS	PLA2G4B	PLAAT3	PLA2G4E	PLA2G4F	PLA2G2D	PLA2G4D	PLA2G2E	PLA2G2C	PLA2G3	PLA1A	PLA2G1B	PLA2G2A	PLA2G4A	PLA2G5	PLA2G2F	PLA2G12A	PLA2G6	PLA2G10	PLA2G12B	PLA2G4C	JMJD7-PLA2G4B	ELK1	ETS1	ETS2	SHOC2
Ras signaling pathway (04014_5)	MAP2K1	MAP2K2	RAF1	RRAS2	MRAS	HRAS	KRAS	NRAS	RRAS	AKT3	AKT1	AKT2	PIK3CA	PIK3CB	PIK3CD	PIK3R1	PIK3R2	PIK3R3	TIAM1	RAC1	RAC2	RAC3	RALGDS	RGL1	RGL2	RALA	RALB	PLCE1	PRKCA	PRKCB	PRKCG	ABL1	ABL2	RIN1	RAB5A	RAB5B	RAB5C	RASA4B	RASA4	RASA3	RASA1	RASA2	RASAL3	RASAL1	SYNGAP1	RASAL2	NF1	AFDN	RASSF5
Ras signaling pathway (04014_6)	RAF1	RRAS2	MRAS	HRAS	KRAS	NRAS	RRAS	AKT3	AKT1	AKT2	PIK3CA	PIK3CB	PIK3CD	PIK3R1	PIK3R2	PIK3R3	TIAM1	RAC1	RAC2	RAC3	RALGDS	RGL1	RGL2	PLCE1	RIN1	BAD	CHUK	IKBKB	IKBKG	FOXO4	RASA4B	RASA4	RASA3	RASA1	RASA2	RASAL3	RASAL1	SYNGAP1	RASAL2	NF1	RHOA	AFDN	RASSF5	RASSF1	STK4	RAPGEF5	RALBP1	PAK4	PAK1
Ras signaling pathway (04014_9)	RRAS2	MRAS	HRAS	KRAS	NRAS	RRAS	RALGDS	RGL1	RGL2	RALA	RALB	PLD1	PLD2	MAPK8	MAPK9	MAPK10	RALBP1	CDC42	RAC1	RAC2	RAC3	EXOC2	TBK1
Ras signaling pathway (04014_10)	GRB2	SOS1	SOS2	SHC2	SHC4	SHC3	SHC1	GAB1	GAB2	PTPN11	RRAS2	MRAS	HRAS	KRAS	NRAS	RRAS	RASGRP1	RASGRP2	RASGRP4	RASGRP3	RASGRF1	RASGRF2
Ras signaling pathway (04014_11)	GRB2	SOS1	SOS2	RRAS2	MRAS	HRAS	KRAS	NRAS	RRAS	RASGRP1	RASGRP2	RASGRP4	RASGRP3	RASGRF1	RASGRF2	CALML6	CALML5	CALM1	CALM2	CALM3	CALML3	CALML4	GNB5	GNB1	GNB2	GNB3	GNG3	GNG4	GNG5	GNG7	GNG10	GNG11	GNGT1	GNGT2	GNG13	GNG2	GNG12	GNB4	GNG8	PLCG1	PLCG2	PRKACA	PRKACB	PRKACG
Ras signaling pathway (04014_12)	RASSF5	TIAM1	PIK3CA	PIK3CB	PIK3CD	PIK3R1	PIK3R2	PIK3R3	AFDN	RAF1	RAPGEF5	RALGDS	PLCE1	RIN1	HRAS	KRAS	NRAS	MRAS	RRAS	RALBP1	SOS1	RASGRF1	RASGRP1	RASGRP2	RASGRP4	RASGRP3	BRAP
Rap1 signaling pathway (04015_2)	MAP2K1	MAP2K2	RAP1A	RAP1B	APBB1IP	RALGDS	RAC1	RAC2	RAC3	RASSF5	MAP2K3	MAP2K6	MAPK14	MAPK11	MAPK13	MAPK12	VASP	PFN3	PFN4	PFN1	PFN2	SIPA1L1	SIPA1	RAP1GAP	RALA	RALB	AFDN	BRAF	ITGAL	ITGAM	ITGB1	ITGB2	VAV2	TIAM1	ARAP3	RHOA	PRKD1	KRIT1	SRC	FARP2	CDC42	PIK3CA	PIK3CB	PIK3CD	PIK3R1	PIK3R2	PIK3R3	AKT3	AKT1
Rap1 signaling pathway (04015_3)	CSF1	EFNA1	EFNA2	EFNA3	EFNA4	EFNA5	EGF	FGF1	FGF2	FGF3	FGF4	FGF5	FGF6	FGF7	FGF8	FGF9	FGF10	VEGFD	FGF20	FGF21	FGF22	ANGPT1	ANGPT2	HGF	IGF1	INS	KITLG	NGF	ANGPT4	PDGFA	PDGFB	PGF	PDGFC	VEGFA	VEGFB	VEGFC	PDGFD	FGF23	FGF18	FGF17	FGF16	FGF19	CSF1R	EGFR	EPHA2	FGFR1	FGFR3	FGFR2	FGFR4
Rap1 signaling pathway (04015_6)	CSF1R	EGFR	EPHA2	FGFR1	FGFR3	FGFR2	FGFR4	FLT1	FLT4	IGF1R	INSR	KDR	KIT	MET	NGFR	PDGFRA	PDGFRB	TEK	RAP1A	RAP1B	DOCK4	RAPGEF3	RAPGEF4	GNAQ	PLCB1	PLCB2	PLCB3	PLCB4	CRK	CRKL	RAPGEF1	RAPGEF6	RAPGEF2	RAPGEF5	RASGRP3	RASGRP2	LCP2	SKAP1	PRKD3	PRKD2	PRKD1	BCAR1
Rap1 signaling pathway (04015_9)	RAP1A	RAP1B	DOCK4	RAPGEF3	RAPGEF4	GNAS	GNAQ	RAPGEF1	RAPGEF6	RAPGEF2	RAPGEF5	RASGRP3	RASGRP2	ADCY1	ADCY2	ADCY3	ADCY5	ADCY6	ADCY7	ADCY8	ADCY9	ADCY4	CALML6	CALML5	CALM1	CALM2	CALM3	CALML3	CALML4	LCP2	SKAP1	PRKD3	PRKD2	PRKD1
Rap1 signaling pathway (04015_13)	RAP1A	RAP1B	DOCK4	RAPGEF3	RAPGEF4	PLCB1	PLCB2	PLCB3	PLCB4	CRK	CRKL	CDH1	RAPGEF1	MAGI3	MAGI1	MAGI2	RAPGEF6	RAPGEF2	MRAS	RAPGEF5	RASGRP3	RASGRP2	ADCY1	ADCY2	ADCY3	ADCY5	ADCY6	ADCY7	ADCY8	ADCY9	ADCY4	LCP2	SKAP1	PRKCA	PRKCB	PRKCG	PRKD3	PRKD2	PRKD1	LAT
Calcium signaling pathway (04020_1)	ITPKA	ITPKB	ITPKC	ADCY1	ADCY3	ADCY8	PDE1A	PDE1C	PDE1B	NOS1	NOS2	NOS3	VDAC1	VDAC2	VDAC3	PPIF	SLC8A2	SLC8A1	SLC8A3	CAMK4	CAMK2A	CAMK2B	CAMK2D	CAMK2G	PPP3CA	PPP3CB	PPP3CC	PPP3R1	PPP3R2	PRKCA	PRKCB	PRKCG	PTK2B	CD38	PLCE1	NA	EGFR	ERBB2	ERBB3	ERBB4	PDGFRA	PDGFRB	GNA11	GNA15	GNAQ	GNA14	CHRNA7	P2RX2	GRIN1
Calcium signaling pathway (04020_2)	ITPKA	ITPKB	ITPKC	VDAC1	VDAC2	VDAC3	PPIF	SLC8A2	SLC8A1	SLC8A3	PRKCA	PRKCB	PRKCG	PTK2B	PLCE1	NA	EGFR	ERBB2	ERBB3	ERBB4	PDGFRA	PDGFRB	GNA11	GNA15	GNAQ	GNA14	CHRNA7	P2RX2	GRIN1	GRIN2A	GRIN2C	GRIN2D	P2RX1	P2RX3	P2RX4	P2RX5	P2RX7	P2RX6	PLCG1	PLCG2	PLCZ1	PLCD3	PLCD1	PLCD4	ITPR1	ITPR2	ITPR3	RYR1	RYR2
Calcium signaling pathway (04020_4)	ADCY1	ADCY2	ADCY3	ADCY7	ADCY8	ADCY9	ADCY4	CHRM1	CHRM3	CHRM5	ADORA2A	ADORA2B	ADRB1	ADRB2	ADRB3	DRD1	DRD5	HRH2	HTR4	HTR5A	HTR6	HTR7	PLN	PRKACA	PRKACB	PRKACG	GNAL	GNAS
cGMP-PKG signaling pathway (04022_1)	PPP1R12A	PPP1CA	PPP1CB	PPP1CC	MYL9	NPR1	PRKG1	PRKG2	GUCY1A2	GUCY1A1	GUCY1B1	ITPR1	ITPR2	ITPR3	KCNMB2	KCNU1	KCNMB3	KCNMB4	KCNMA1	KCNMB1	NPR2	MRVI1	CNGB1	CNGA1	RGS2	ADRA1D	ADRA1B	ADRA1A	ADRA2A	ADRA2B	ADRA2C	AGTR1	EDNRA	EDNRB	PLCB1	PLCB2	PLCB3	PLCB4	CACNA1C	CACNA1D	CACNA1F	CACNA1S	ROCK1	ROCK2	GNA11	GNAQ	TRPC6	ATP2A1	ATP2A2
cGMP-PKG signaling pathway (04022_4)	PPP3CA	PPP3CB	PPP3CC	PPP3R1	PPP3R2	NFATC1	NFATC2	NFATC3	NFATC4	MEF2B	MEF2A	BORCS8-MEF2B	MEF2C	MEF2D	GATA4	SRF	MYH7	NPPB	TRPC6
cGMP-PKG signaling pathway (04022_6)	OPRD1	PIK3R6	PIK3R5	PIK3CG	AKT3	AKT1	AKT2	NOS3	IRS1	IRS4	IRS2	INSR	BDKRB2	ADORA1	ADORA3	GNAI1	GNAI2	GNAI3
cGMP-PKG signaling pathway (04022_7)	NPR1	PRKG1	PRKG2	GUCY1A2	GUCY1A1	GUCY1B1	NPR2	CNGB1	CNGA1	PIK3R6	PIK3R5	PIK3CG	AKT3	AKT1	AKT2	NOS3	PDE2A	PDE3A	PDE3B	ADRB1	ADRB2	ADRB3	GNAI1	GNAI2	GNAI3
cAMP signaling pathway (04024_1)	CACNA1C	CACNA1D	CACNA1F	CACNA1S	RYR2	TNNI3	ATP1B4	ATP1A1	ATP1A2	ATP1A3	ATP1A4	ATP1B1	ATP1B2	ATP1B3	FXYD2	SLC9A1	GNAI1	GNAI2	GNAI3	GNAS	ADCY1	ADCY2	ADCY3	ADCY5	ADCY6	ADCY7	ADCY8	ADCY9	ADCY4	PRKACA	PRKACB	PRKACG	MAPK1	MAPK3	PLN	CFTR	CALML6	CALML5	CALM1	CALM2	CALM3	CALML3	CALML4	RAPGEF3	RAPGEF4	ATP2B1	ATP2B2	ATP2B3	ATP2B4
cAMP signaling pathway (04024_2)	CACNA1C	CACNA1D	CACNA1F	CACNA1S	RYR2	TNNI3	SLC9A1	CHRM1	CHRM2	ADORA1	ADRB2	DRD2	EDNRA	GABBR1	GHSR	HCAR1	FFAR2	HTR1A	HTR1B	HTR1D	HTR1E	HTR1F	HCAR2	NPY1R	OXTR	SUCNR1	PTGER3	SSTR1	SSTR2	SSTR5	HCAR3	GABBR2	GNAI1	GNAI2	GNAI3	GNAS	ADCY1	ADCY2	ADCY3	ADCY5	ADCY6	ADCY7	ADCY8	ADCY9	ADCY4	PRKACA	PRKACB	PRKACG	PLN
Cytokine-cytokine receptor interaction (04060_14)	LIFR	IL6ST	CNTFR	CLCF1
Cytokine-cytokine receptor interaction (04060_28)	IL17A	IL17RA	IL17RC	IL17F
Cytokine-cytokine receptor interaction (04060_83)	TNFRSF14	LTBR	TNFSF14	LTB	LTA	TNFRSF1A	TNFRSF1B	TNF
Cytokine-cytokine receptor interaction (04060_85)	TNFRSF11A	TNFRSF10C	TNFRSF11B	TNFRSF10B	TNFSF10	TNFRSF10A	TNFRSF10D	TNFSF11
Chemokine signaling pathway (04062_1)	CXCR6	CCR9	CCR1	CCR3	CCR4	CCR5	CCR6	CCR7	CCR8	CX3CR1	CCR10	XCR1	CXCR3	CXCR1	CXCR2	CXCR5	CCR2	CXCR4	CCL26	CXCL13	CCL27	CXCL1	CXCL2	CXCL3	CXCL8	CXCL10	CCL4L1	CCL3L3	CXCL9	PF4	PF4V1	PPBP	CCL28	CXCL16	CCL1	CCL2	CCL3	CCL3L1	CCL4	CCL5	CCL7	CCL8	CCL11	CCL13	CCL14	CCL15	CCL16	CCL17	CCL18
Chemokine signaling pathway (04062_4)	FGR	HCK	LYN	SRC	RHOA	PIK3CA	PIK3CB	PIK3CD	PIK3R1	PIK3R2	PIK3R3	ELMO1	ROCK1	ROCK2	VAV3	VAV1	VAV2	ITK	CDC42	RAP1A	RAP1B	WAS	WASL	PARD3	PRKCZ	TIAM1	PAK1	DOCK2	RAC1	RAC2	PREX1
NF-kappa B signaling pathway (04064_1)	BCL2L1	BCL2	BIRC2	BIRC3	NFKBIA	IKBKB	NFKB1	RELA	MAP3K7	TNFAIP3	TRAF1	TRAF2	CXCL8	CFLAR	BCL2A1	XIAP	GADD45B	IL1B	PTGS2	TNF	CCL4L1	CCL4	CCL4L2	VCAM1	CXCL2	BTK	NFKB2
NF-kappa B signaling pathway (04064_3)	NFKBIA	IRAK1	IRAK4	MYD88	TRAF2	TRAF5	RIPK1	TRADD	IL1R1	TNFRSF1A	MAP3K14	IKBKB	MAP3K7	CD40	TRAF6	TNFRSF11A	TAB1	TAB2	TAB3	DDX58	TIRAP	TICAM2	TICAM1	BIRC2	BIRC3	BTK
NF-kappa B signaling pathway (04064_5)	TNFSF14	LTBR	TRAF2	TRAF3	MAP3K14	CHUK	MAP3K7	TAB1	TAB2	TAB3	TRAF6	BIRC2	BIRC3	TRAF5	LTA	LTB
NF-kappa B signaling pathway (04064_9)	RELB	NFKB2	CCL13	CXCL12	CCL21	CCL19	TNFSF13B	ICAM1
NF-kappa B signaling pathway (04064_21)	NFKBIA	NFKB1	RELA	CSNK2A1	CSNK2A2	CSNK2B	BCL2L1	BCL2A1
HIF-1 signaling pathway (04066_1)	RBX1	ELOB	ELOC	VEGFA	EGLN2	EGLN3	EGLN1	VHL	ARNT	CREBBP	EP300	HIF1A	SLC2A1	PRKCA	PRKCB	PRKCG	LDHA	PDK1	HK1	HK2	HK3	HKDC1	PFKL	GAPDH	ALDOA	ENO1	ENO2	ENO3	ENO4	PGK1	PFKFB3	EPO	TF	TFRC	FLT1	EGF	SERPINE1	ANGPT1	ANGPT2	ANGPT4	TEK	TIMP1	EDN1	NOS2	NOS3	HMOX1	NPPA	LTBR	TLR4
HIF-1 signaling pathway (04066_3)	EGF	IGF1	INS	EGFR	ERBB2	IGF1R	INSR	PIK3CA	PIK3CB	PIK3CD	PIK3R1	PIK3R2	PIK3R3	AKT3	AKT1	AKT2	MTOR	EIF4EBP1	MAPK1	MAPK3	MAP2K1	MAP2K2	MKNK2	MKNK1
HIF-1 signaling pathway (04066_10)	EGLN2	EGLN3	EGLN1	PIK3CA	PIK3CB	PIK3CD	PIK3R1	PIK3R2	PIK3R3	AKT3	AKT1	AKT2	MTOR	PLCG1	PLCG2	PRKCA	PRKCB	PRKCG	EIF4EBP1	RPS6KB1	RPS6KB2	RPS6	MAPK1	MAPK3
FoxO signaling pathway (04068_6)	PCK1	PCK2	G6PC	G6PC2	G6PC3	FOXO6	FOXO1	FOXO3	FOXO4	CCNB3	CCNB1	CCNB2	CCND1	CCND2	CDKN2B	CDKN2D	CDKN1A	CDKN1B	RBL2	PLK4	PLK2	PLK3	PLK1	GADD45G	GADD45A	GADD45B	FASLG	BCL2L11	TNFSF10	BCL6	CAT	SOD2	ATM	IL7R	KLF2	S1PR1	S1PR4	RAG1	RAG2	BNIP3	GABARAP	GABARAPL2	GABARAPL1	ATG12	FBXO32	FBXO25	CCNG2
FoxO signaling pathway (04068_7)	CHUK	IKBKB	MAPK8	MAPK9	MAPK10	MAPK1	MAPK3	PRKAG2	PRKAG3	PRKAA1	PRKAA2	PRKAB1	PRKAB2	PRKAG1	FOXO6	FOXO1	FOXO3	FOXO4	AKT3	AKT1	AKT2	PIK3CA	PIK3CB	PIK3CD	PIK3R1	PIK3R2	PIK3R3	PDPK1	STK4	PTEN	CDK2	CSNK1E	SGK2	SGK3	SGK1	STAT3	NLK	MAPK14	MAPK11	MAPK13	MAPK12	SETD7	PRMT1	STK11
FoxO signaling pathway (04068_8)	CHUK	IKBKB	FOXO6	FOXO1	FOXO3	FOXO4	AKT3	AKT1	AKT2	PIK3CA	PIK3CB	PIK3CD	PIK3R1	PIK3R2	PIK3R3	PDPK1	IRS1	IRS4	IRS2	PTEN	HOMER3	HOMER2	HOMER1	AGAP2	SGK2	SGK3	SGK1
Phosphatidylinositol signaling system (04070_1)	PTEN	PLCD3	PLCB1	PLCE1	PLCB2	PLCB3	PLCB4	PLCD1	PLCG1	PLCG2	PLCD4	PLCZ1	CDIPT	PIK3CA	PIK3CB	PIK3CD	PIK3R1	PIK3R2	PIK3R3	PIP5K1C	PIP5K1A	PIP5K1B	PIKFYVE	PI4KA	PI4KB	PI4K2B	PI4K2A	PIK3C2A	PIK3C2B	PIK3C2G	CDS1	CDS2	DGKK	DGKA	DGKB	DGKG	DGKH	DGKQ	DGKZ	DGKE	DGKD	DGKI	INPP4A	INPP4B	INPP5B	OCRL	INPP5E	SYNJ1	SYNJ2
Sphingolipid signaling pathway (04071_4)	RAF1	PIK3CA	PIK3CB	PIK3CD	PIK3R1	PIK3R2	PIK3R3	PDPK1	PRKCA	PRKCB	PRKCG	S1PR1	S1PR2	S1PR3	S1PR4	S1PR5	GNAI1	GNAI2	GNAI3	GNAQ	GNA13	GNA12	HRAS	KRAS	NRAS	PLCB1	PLCB2	PLCB3	PLCB4	RAC1	RAC2	RAC3
Sphingolipid signaling pathway (04071_8)	S1PR2	S1PR3	S1PR4	S1PR5	GNA13	GNA12	RHOA	ROCK1	ROCK2	PTEN	NFKB1	RELA
Sphingolipid signaling pathway (04071_12)	CTSD	MAP3K5	PRKCZ	PPP2R3B	PPP2R3C	PPP2CA	PPP2CB	PPP2R1A	PPP2R1B	PPP2R2A	PPP2R2B	PPP2R2C	PPP2R3A	PPP2R5A	PPP2R5B	PPP2R5C	PPP2R5D	PPP2R5E	PPP2R2D	MAPK8	MAPK9	MAPK10	BID	MAPK14	MAPK11	MAPK13	MAPK12	BAX	AKT3	AKT1	AKT2	TP53	BCL2
Sphingolipid signaling pathway (04071_14)	SPHK2	SPHK1	ADORA1	ADORA3	OPRD1	BDKRB2	GNAI1	GNAI2	GNAI3	PLCB1	PLCB2	PLCB3	PLCB4	PRKCE
Sphingolipid signaling pathway (04071_16)	TNF	NSMAF	SPHK2	SPHK1	TNFRSF1A	TRADD	TRAF2
Sphingolipid signaling pathway (04071_17)	SPHK2	SPHK1	PIK3CA	PIK3CB	PIK3CD	PIK3R1	PIK3R2	PIK3R3	PLD1	PLD2	TRADD	TRAF2	PLCB1	PLCB2	PLCB3	PLCB4	PRKCE	MAPK1	MAPK3
Phospholipase D signaling pathway (04072_2)	RRAS2	MRAS	HRAS	KRAS	NRAS	RRAS	GRB2	SOS1	SOS2	PIK3CA	PIK3CB	PIK3CD	PIK3R1	PIK3R2	PIK3R3	SHC2	SHC4	SHC3	SHC1	KITLG	EGFR	INSR	KIT	PDGFRA	PDGFRB	GAB1	GAB2	PTPN11	RHOA	PLD1	PLD2	PDGFA	PDGFB	PDGFC	PDGFD	INS	EGF	ARF1	ARF6
Phospholipase D signaling pathway (04072_6)	RAF1	RALA	RALB	RHOA	LPAR6	AGTR1	LPAR1	F2R	LPAR3	LPAR4	GRM1	GRM2	GRM3	GRM4	GRM5	GRM6	GRM7	GRM8	CXCR1	CXCR2	AVPR1A	AVPR1B	AVPR2	LPAR5	PTGFR	LPAR2	PLCG1	PLCG2	RAPGEF3	RAPGEF4	PRKCA	PLD1	PLD2	PLCB1	PLCB2	PLCB3	PLCB4	MTOR	PIP5K1C	PIP5K1A	PIP5K1B	CYTH4	CYTH3	CYTH2	CYTH1	ARF1	RRAS2	RRAS	PTK2B
Phospholipase D signaling pathway (04072_8)	LPAR6	AGTR1	LPAR1	F2R	LPAR3	LPAR4	GRM1	GRM2	GRM3	GRM4	GRM5	GRM6	GRM7	GRM8	CXCR1	CXCR2	AVPR1A	AVPR1B	AVPR2	LPAR5	PTGFR	LPAR2	PLCG1	PLCG2	RAPGEF3	RAPGEF4	PRKCA	PLD1	PLD2	PLCB1	PLCB2	PLCB3	PLCB4	RHOA	GNA13	GNAS	ADCY1	ADCY2	ADCY3	ADCY5	ADCY6	ADCY7	ADCY8	ADCY9	ADCY4	PTK2B	GNA12	CXCL8	AVP
Phospholipase D signaling pathway (04072_9)	MAP2K1	MAP2K2	RAF1	AKT3	AKT1	AKT2	PIK3CA	PIK3CB	PIK3CD	PIK3R1	PIK3R2	PIK3R3	RALGDS	RALA	RALB	RHOA	PLCG1	PLCG2	RAPGEF3	RAPGEF4	PRKCA	PLD1	PLD2	PLCB1	PLCB2	PLCB3	PLCB4	RHEB	MTOR	PIP5K1C	PIP5K1A	PIP5K1B	CYTH4	CYTH3	CYTH2	CYTH1	ARF1	RRAS2	RRAS	PTK2B	SPHK2	SPHK1	ARF6
Cell cycle (04110_3)	SKP1	CUL1	RBX1	PCNA	ATM	ATR	SFN	CHEK1	CHEK2	CDKN1A	PRKDC	MDM2	CREBBP	EP300	SKP2	GADD45G	GADD45A	GADD45B	TP53	CDKN1B	CDKN1C	CDKN2B	TGFB1	TGFB2	TGFB3	SMAD4	SMAD2	SMAD3	CDC6	CDC25A	GSK3B	CDK7	CDK2	CDK4	CDK6	CCNH	CCNA2	CCNA1	CCNE1	CCNE2	CCND1	CCND2	CCND3	CDKN2C	CDKN2D	CDKN2A	MYC	TFDP1	TFDP2
Cell cycle (04110_4)	ORC6	ORC3	ORC5	ORC4	ORC2	ORC1	MCM7	MCM6	MCM5	MCM4	MCM3	MCM2	DBF4	CDC7	CDC45	CDC6	CDK2	CCNA2	CCNA1
Cell cycle (04110_6)	FZR1	ANAPC10	CDC26	ANAPC13	ANAPC2	ANAPC4	ANAPC5	ANAPC7	ANAPC11	ANAPC1	CDC23	CDC16	CDC27	CDK1	PLK1	CDC14B	CDC14A	YWHAQ	YWHAB	YWHAE	YWHAG	YWHAH	YWHAZ	SFN	CHEK1	CHEK2	PKMYT1	WEE2	WEE1	GADD45G	GADD45A	GADD45B	TP53	CDC20	CDC25B	CDC25C	CCNB3	CCNB1	CCNB2
Cell cycle (04110_8)	FZR1	ANAPC10	CDC26	ANAPC13	ANAPC2	ANAPC4	ANAPC5	ANAPC7	ANAPC11	ANAPC1	CDC23	CDC16	CDC27	BUB1B	MAD2L2	MAD2L1	BUB3	PTTG2	PTTG1	ESPL1	SMC1B	SMC1A	CDC20	SMC3	STAG1	STAG2	RAD21
Cell cycle (04110_9)	FZR1	ANAPC10	CDC26	ANAPC13	ANAPC2	ANAPC4	ANAPC5	ANAPC7	ANAPC11	ANAPC1	CDC23	CDC16	CDC27	CDK1	PCNA	PLK1	ATM	ATR	CHEK1	CHEK2	CDKN1A	PKMYT1	WEE2	WEE1	RB1	TP53	CDC25B	CDC25C	CDC25A	CCNB3	CCNB1	CCNB2	CDK7	CDK4	CDK6	CCNH
Oocyte meiosis (04114_1)	MOS	CDK1	MAD2L2	MAD2L1	PKMYT1	RPS6KA6	RPS6KA1	RPS6KA2	RPS6KA3	MAPK1	MAPK3	MAP2K1	SGO1	BUB1
Oocyte meiosis (04114_3)	MAD2L2	MAD2L1	CCNB1	CDK1	SKP1	CUL1	RBX1	CCNE1	CCNE2	FBXO43	ANAPC10	CDC26	ANAPC13	ANAPC2	ANAPC4	ANAPC5	ANAPC7	ANAPC11	ANAPC1	CDC23	CDC16	CDC27	CDC20	PTTG2	PTTG1	CDK2	FBXW11	BTRC	CAMK2A	CAMK2B	CAMK2D	CAMK2G	PLK1	ITPR1	ITPR2	ITPR3	CALML6	CALML5	CALM1	CALM2	CALM3	CALML3	CALML4	PPP3CA	PPP3CB	PPP3CC	PPP3R1	PPP3R2	PPP2CA
Oocyte meiosis (04114_4)	CDK1	CCNB2	ANAPC10	CDC26	ANAPC13	ANAPC2	ANAPC4	ANAPC5	ANAPC7	ANAPC11	ANAPC1	CDC23	CDC16	CDC27	CDC20	PTTG2	PTTG1	FBXO5	CDC25C	FBXO43	AURKA	CPEB2	CPEB3	CPEB1	CPEB4	PLK1	PRKACA	PRKACB	PRKACG	YWHAQ	YWHAB	YWHAE	YWHAG	YWHAH	YWHAZ	PPP1CA	PPP1CB	PPP1CC	MAPK12	SPDYE2B	SPDYE18	SPDYA	SPDYE1	SPDYC	SPDYE4	SPDYE3	SPDYE2	SPDYE5	SPDYE6
Oocyte meiosis (04114_5)	CDK1	CCNB2	PKMYT1	ANAPC10	CDC26	ANAPC13	ANAPC2	ANAPC4	ANAPC5	ANAPC7	ANAPC11	ANAPC1	CDC23	CDC16	CDC27	CDC20	CDC25C	AURKA	CPEB2	CPEB3	CPEB1	CPEB4	PLK1	PRKACA	PRKACB	PRKACG	ADCY1	ADCY2	ADCY3	ADCY5	ADCY6	ADCY7	ADCY8	ADCY9	ADCY4	PGR	AR	IGF1R	SLK
Oocyte meiosis (04114_6)	CCNB2	ANAPC10	CDC26	ANAPC13	ANAPC2	ANAPC4	ANAPC5	ANAPC7	ANAPC11	ANAPC1	CDC23	CDC16	CDC27	CDC20	PTTG2	PTTG1	CDC25C	FBXO43	CPEB2	CPEB3	CPEB1	CPEB4	SKP1	CUL1	RBX1	FBXW11	BTRC	ESPL1	SLK
Oocyte meiosis (04114_14)	MAD2L2	MAD2L1	ANAPC10	CDC26	ANAPC13	ANAPC2	ANAPC4	ANAPC5	ANAPC7	ANAPC11	ANAPC1	CDC23	CDC16	CDC27	PTTG2	PTTG1	ESPL1	REC8	SGO1	PPP2R5A	PPP2R5B	PPP2R5C	PPP2R5D	PPP2R5E	PPP2CA	PPP2CB	PPP2R1A	PPP2R1B	BUB1
p53 signaling pathway (04115_1)	SIAH1	IGFBP3	GADD45G	GADD45A	GADD45B	MDM4	CHEK1	ATR	CHEK2	ATM	RPRM	SFN	CDK2	CCNE1	CCNE2	TSC2	PPM1D	TP73	CCNG1	CCNG2	COP1	RRM2B	RRM2	DDB2	STEAP3	PTEN	SERPINB5	CD82	THBS1	IGF1	SERPINE1	ADGRB1	CDKN2A	CDKN1A	ZMAT3	EI24	TP53I3	FAS	GTSE1	BAX	PIDD1	TNFRSF10B	CASP8	CDK1	CYCS	MDM2	TP53	RCHY1	CDK4
Sulfur relay system (04122_1)	MOCS3	URM1	NFS1	MPST	TST
SNARE interactions in vesicular transport (04130_1)	BNIP1	USE1	STX18	SEC22B
SNARE interactions in vesicular transport (04130_2)	BET1	BET1L	SEC22B	GOSR2	STX5
SNARE interactions in vesicular transport (04130_3)	YKT6	VTI1B	VTI1A	STX8	STX7
SNARE interactions in vesicular transport (04130_4)	VAMP4	STX16	STX6	STX10	VTI1B	VTI1A
Mitophagy - animal (04137_2)	OPTN	TBK1	SQSTM1	CALCOCO2	NBR1	GABARAP	GABARAPL2	GABARAPL1	SRC	ULK1	FUNDC1	CSNK2A1	CSNK2A2	CSNK2B	PGAM5	BCL2L1	BNIP3	BNIP3L	TAX1BP1	TBC1D15	TBC1D17	RAB7B	RAB7A	FIS1	BCL2L13	HIF1A	E2F1	RELA	TP53	SP1	CITED2
Mitophagy - animal (04137_4)	PINK1	PRKN	GABARAP	GABARAPL2	GABARAPL1	FUNDC1	PGAM5	BCL2L1	BNIP3	RHOT1	RHOT2	BECN1	TOMM7	HIF1A	E2F1	RELA	MFN2	UBB
Mitophagy - animal (04137_5)	PINK1	MFN1	MFN2	AMBRA1	USP8	PRKN	BCL2L1	RHOT1	RHOT2	BECN1	TOMM7	ATG5	ATG9B	ATG9A	TFEB	MITF	TFE3	EIF2AK3	ATF4	MAPK8	MAPK9	MAPK10	JUN	UBB
Mitophagy - animal (04137_6)	PINK1	OPTN	SQSTM1	CALCOCO2	NBR1	GABARAP	GABARAPL2	GABARAPL1	FUNDC1	PGAM5	BCL2L1	BNIP3	BNIP3L	TAX1BP1	TBC1D15	TBC1D17	BCL2L13	HIF1A	E2F1	RELA	RRAS2	MRAS	HRAS	KRAS	NRAS	RRAS
Autophagy - animal (04140_5)	PDPK1	AKT3	AKT1	AKT2	MAP2K1	MAP2K2	MAPK1	MAPK3	HIF1A	DDIT4	BNIP3	TSC2	TSC1	RHEB	RPTOR	DEPTOR	MTOR	AKT1S1	MLST8	STK11	PRKAA1	PRKAA2	CAMKK2	MAP3K7	PRKACA	PRKACB	PRKACG
Autophagy - animal (04140_8)	IGF1R	INS	IRS1	IRS4	IRS2	PIK3CA	PIK3CB	PIK3CD	PIK3R1	PIK3R2	PIK3R3	PTEN	PDPK1	AKT3	AKT1	AKT2	RRAS2	MRAS	HRAS	KRAS	NRAS	RRAS	TSC2	TSC1	RHEB	RPTOR	DEPTOR	MTOR	AKT1S1	MLST8	RPS6KB1	RPS6KB2	PRKAA1	PRKAA2
Autophagy - animal (04140_9)	IGF1R	INS	IRS1	IRS4	IRS2	PIK3CA	PIK3CB	PIK3CD	PIK3R1	PIK3R2	PIK3R3	AKT3	AKT1	AKT2	TSC2	TSC1	RHEB	RPTOR	DEPTOR	MTOR	AKT1S1	MLST8	RPS6KB1	RPS6KB2	IGBP1	ULK1	ULK2	ATG13	RRAGB	RRAGA	RRAGD	RRAGC	PRKAA1	PRKAA2	PRKACA	PRKACB	PRKACG
Autophagy - animal (04140_11)	RHEB	RPTOR	DEPTOR	MTOR	AKT1S1	MLST8	RPS6KB1	RPS6KB2	PPP2CA	PPP2CB	IGBP1	ULK1	ULK2	ATG13	RB1CC1	ATG101	ATG2A	ATG2B	WIPI2	WIPI1	RRAGB	RRAGA	RRAGD	RRAGC	PRKAA1	PRKAA2	PRKACA	PRKACB	PRKACG	TP53INP2	TRAF6	AMBRA1	ITPR1	BCL2	BCL2L1	ATG9B	ATG9A	STX17	BECN1	NRBF2	PIK3C3	ATG14	UVRAG	HMGB1	DAPK1	DAPK3	DAPK2	GABARAP	GABARAPL2
Autophagy - animal (04140_13)	AKT3	AKT1	AKT2	MAPK1	MAPK3	DDIT4	TSC2	TSC1	RHEB	RPTOR	MTOR	AKT1S1	RPS6KB1	RPS6KB2	IGBP1	ULK1	ULK2	ATG13	RRAGB	RRAGA	RRAGD	RRAGC	STK11	PRKAA1	PRKAA2	CAMKK2	MAP3K7	PRKACA	PRKACB	PRKACG	PRAP1	GABARAP	GABARAPL2	GABARAPL1
Autophagy - animal (04140_14)	HIF1A	DDIT4	BNIP3	TSC2	TSC1	RHEB	RPTOR	DEPTOR	MTOR	AKT1S1	MLST8	ULK1	ULK2	ATG13	MAPK8	MAPK9	MAPK10	PRKACA	PRKACB	PRKACG	BCL2	BCL2L1	BECN1	BAD
Autophagy - animal (04140_15)	TSC2	TSC1	RHEB	RPTOR	DEPTOR	MTOR	AKT1S1	MLST8	RPS6KB1	RPS6KB2	PPP2CA	PPP2CB	IGBP1	ULK1	ULK2	ATG13	RB1CC1	ATG101	ATG2A	ATG2B	RRAGB	RRAGA	RRAGD	RRAGC	STK11	PRKAA1	PRKAA2	CAMKK2	MAP3K7	PRKACA	PRKACB	PRKACG	TP53INP2	TRAF6	AMBRA1	ATG9B	ATG9A	BECN1	ATG14	ATG12	ATG5	ATG7	ATG3	PRKCQ	GABARAP	GABARAPL2	GABARAPL1	ATG4A	ATG4B
Autophagy - animal (04140_20)	EIF2AK3	EIF2AK4	EIF2S1	ATG12	ATG5	ATG7	ATG10	GABARAP	GABARAPL2	GABARAPL1
Autophagy - animal (04140_25)	VAMP8	STX17	ATG14	SNAP29
Protein processing in endoplasmic reticulum (04141_1)	ATF4	DDIT3	EIF2S1	PPP1R15A	ATF6B	ATF6	ERN1	EIF2AK1	EIF2AK4	EIF2AK2	EIF2AK3	XBP1	WFS1	NFE2L2	BCL2
Protein processing in endoplasmic reticulum (04141_3)	CASP12	CAPN1	CAPN2	BAK1	BAX	BCL2
Protein processing in endoplasmic reticulum (04141_4)	VCP	UFD1	NPLOC4	NSFL1C	UBXN6	SVIP
Protein processing in endoplasmic reticulum (04141_5)	SEC24B	SEC23B	SEC23A	SEC24A	SEC24C	SEC24D	SEC31A	SEC31B	SEC13	SAR1B	SAR1A	PREB
Endocytosis (04144_2)	RNF41	WWP1	NEDD4L	CBLC	MDM2	NEDD4	SMURF1	SMURF2	TRAF6	ITCH	CBL	CBLB	EPN2	EPN1	EPN3	EPS15	EPS15L1	EGFR	FGFR3	FGFR2	FGFR4	IGF1R	PDGFRA	SH3KBP1	SH3GLB1	SH3GLB2	SH3GL1	SH3GL2	SH3GL3
Endocytosis (04144_5)	MVB12B	MVB12A	CHMP4B	CHMP4A	CHMP4C	PDCD6IP	CHMP7
Endocytosis (04144_6)	CHMP1A	CHMP1B	CHMP2B	CHMP2A	VPS4A	VPS4B	VTA1	CHMP5
Endocytosis (04144_7)	RAB11A	RAB11B	RAB11FIP2	RAB11FIP5	RAB11FIP1	EHD3	RAB4A	RBSN	EHD1	VPS45
Phagosome (04145_2)	RAB7B	RAB7A	RILP	DYNC1H1	DYNC1I1	DYNC1I2	DYNC1LI2	DYNC1LI1	DYNC2H1	TUBA1B	TUBA3E	TUBA3D	TUBA8	TUBA4A	TUBA3C	TUBA1A	TUBAL3	TUBA1C	TUBB3	TUBB4A	TUBB4B	TUBB	TUBB8	TUBB2B	TUBB2A	TUBB1	TUBB6
Peroxisome (04146_1)	PEX14	PEX13	PEX5L	PEX5	PEX7
mTOR signaling pathway (04150_10)	RRAGB	RRAGA	RRAGD	RRAGC	NPRL2	NPRL3	DEPDC5	RNF152	SKP2	MIOS	SEC13	WDR59	SEH1L	WDR24	ATP6V1G3	ATP6V1C2	ATP6V1D	ATP6V1H	ATP6V1A	ATP6V1B1	ATP6V1B2	ATP6V1C1	ATP6V1E1	ATP6V1G2	ATP6V1E2	ATP6V1F	ATP6V1G1	SLC38A9	LAMTOR5	LAMTOR2	LAMTOR4	LAMTOR1	LAMTOR3	FLCN	FNIP2	FNIP1
mTOR signaling pathway (04150_11)	MAPK1	MAPK3	MAP2K1	MAP2K2	PDPK1	AKT3	AKT1	AKT2	TSC1	TSC2	RHEB	TBC1D7	RPS6KA6	RPS6KA1	RPS6KA2	RPS6KA3	PRKAA1	PRKAA2	DDIT4	IKBKB	TNFRSF1A	CHUK	AKT1S1	GSK3B	DVL1	DVL2	DVL3	STK11	STRADB	STRADA	CAB39	CAB39L
mTOR signaling pathway (04150_15)	PDPK1	AKT3	AKT1	AKT2	TSC1	TSC2	TBC1D7	CHUK	MTOR	DEPTOR	MLST8	RPTOR	AKT1S1	TTI1	TELO2
mTOR signaling pathway (04150_16)	PIK3CA	PIK3CB	PIK3CD	PIK3R1	PIK3R2	PIK3R3	MAPK1	MAPK3	PTEN	PDPK1	AKT3	AKT1	AKT2	TSC1	TSC2	RHEB	TBC1D7	RPS6KA6	RPS6KA1	RPS6KA2	RPS6KA3	PRKAA1	PRKAA2	DDIT4	IKBKB	CHUK	MTOR	RPTOR	AKT1S1	GSK3B
mTOR signaling pathway (04150_17)	MTOR	PRR5	DEPTOR	MLST8	RICTOR	MAPKAP1	TTI1	TELO2
mTOR signaling pathway (04150_19)	MAPK1	MAPK3	AKT3	AKT1	AKT2	TSC1	TSC2	RHEB	TBC1D7	RPS6KA6	RPS6KA1	RPS6KA2	RPS6KA3	PRKAA1	PRKAA2	DDIT4	IKBKB	GSK3B	FZD10	FZD2	FZD5	FZD3	FZD1	FZD4	FZD6	FZD7	FZD8	FZD9	LRP6	LRP5	DVL1	DVL2	DVL3
PI3K-Akt signaling pathway (04151_6)	RPS6KB1	RPS6KB2	TSC2	TSC1	AKT3	AKT1	AKT2	PDPK1	PIK3CA	PIK3CB	PIK3CD	PIK3R1	PIK3R2	PIK3R3	PTEN	IRS1	CSF1R	EGFR	EPHA2	ERBB2	ERBB3	ERBB4	FGFR1	FGFR3	FGFR2	FGFR4	FLT1	FLT3	FLT4	IGF1R	INSR	KDR	KIT	MET	NGFR	NTRK1	NTRK2	PDGFRA	PDGFRB	TEK	LPAR6	CHRM1	CHRM2	LPAR1	F2R	LPAR3	LPAR4	LPAR5	LPAR2
PI3K-Akt signaling pathway (04151_7)	AKT3	AKT1	AKT2	PDPK1	PIK3CA	PIK3CB	PIK3CD	PIK3R1	PIK3R2	PIK3R3	PTEN	IRS1	CSF1R	EGFR	EPHA2	ERBB2	ERBB3	ERBB4	FGFR1	FGFR3	FGFR2	FGFR4	FLT1	FLT3	FLT4	IGF1R	INSR	KDR	KIT	MET	NGFR	NTRK1	NTRK2	PDGFRA	PDGFRB	TEK	CSF1	EFNA1	EFNA2	EFNA3	EFNA4	EFNA5	EGF	EREG	FGF1	FGF2	FGF3	FGF4	FGF5
PI3K-Akt signaling pathway (04151_8)	RPS6KB1	RPS6KB2	RHEB	TSC2	TSC1	AKT3	AKT1	AKT2	PDPK1	PIK3CA	PIK3CB	PIK3CD	PIK3R1	PIK3R2	PIK3R3	PTEN	IRS1	LPAR6	CHRM1	CHRM2	LPAR1	F2R	LPAR3	LPAR4	LPAR5	LPAR2	GSK3B	MYC	CDKN1B	RBL2	FASLG	BCL2L11	FOXO3	BAD	MDM2	BCL2L1	TP53	GYS1	GYS2	CCND1	PCK1	PCK2	G6PC	G6PC2	G6PC3	CHUK	IKBKB	IKBKG	NFKB1
AMPK signaling pathway (04152_6)	PRKAG2	PRKAG3	PRKAA1	PRKAA2	PRKAB1	PRKAB2	PRKAG1	AKT3	AKT1	AKT2	STK11	PPARGC1A	CAMKK2	ACACA	PFKFB1	PFKFB2	PFKFB3	PFKFB4	TSC2	MTOR	RPTOR	AKT1S1	GYS1	GYS2	PCK1	PCK2	SREBF1	FASN	SCD	SCD5	EEF2K	EEF2	RPS6KB1	RPS6KB2	EIF4EBP1	PPARG	ACACB	CRTC2	TBC1D1	STRADB	STRADA	CAB39	CAB39L	ELAVL1	CCND1	CCNA2	CCNA1	LIPE	HMGCR
Apoptosis (04210_1)	BCL2L1	BIRC2	BIRC3	XIAP	BIRC5	NFKB1	RELA	NFKBIA	AKT3	AKT1	AKT2	MAP3K14	CHUK	IKBKB	IKBKG	PTPN13	CFLAR	GADD45G	GADD45A	GADD45B	BCL2A1	TRAF1	TRAF2
Apoptosis (04210_3)	ATM	TP53	BAX	BAK1	BID	PMAIP1	BBC3	APAF1	TP53AIP1	FAS	TNFRSF10D	TNFRSF10C	TNFRSF10B	TNFRSF10A	PIDD1
Apoptosis (04210_4)	BCL2	BAD	NFKBIA	AKT3	AKT1	AKT2	MAP3K14	CHUK	IKBKB	IKBKG	PIK3CA	PIK3CB	PIK3CD	PIK3R1	PIK3R2	PIK3R3	MAPK8	MAPK9	MAPK10	PDPK1
Apoptosis (04210_5)	BCL2	CASP9	CASP7	CASP3	BAD	BIRC2	BIRC3	XIAP	BIRC5	BID	DIABLO	SEPTIN4	HTRA2	BAX	BAK1	BCL2L1	MAPK8	MAPK9	MAPK10	BBC3	PMAIP1	CTSC	CTSB	CTSD	CTSH	CTSK	CTSL	CTSV	CTSO	CTSS	CTSW	CTSZ	CTSF	DDIT3	CASP2	PIDD1	GZMB	BCL2L11
Apoptosis (04210_7)	DFFA	CASP9	CASP7	CASP3	BIRC2	BIRC3	XIAP	BIRC5	CASP6	APAF1	CYCS	BID	CASP8	CAPN1	CAPN2	CFLAR	FADD	TRADD	SPTA1	SPTAN1	LMNA	LMNB1	LMNB2	PARP2	PARP3	PARP1	PARP4	DIABLO	SEPTIN4	HTRA2	CASP12	CTSC	CTSB	CTSD	CTSH	CTSK	CTSL	CTSV	CTSO	CTSS	CTSW	CTSZ	CTSF	GZMB	ACTB	ACTG1	TUBA1B	TUBA3E	TUBA3D
Apoptosis (04210_12)	CASP7	CASP3	CASP6	CASP8	CASP10	CFLAR	TRAF2	RIPK1	TRADD	FADD	TNFRSF1A	TNF	GZMB
Apoptosis (04210_18)	CASP8	CASP10	MAP3K14	TRAF2	RIPK1	TRADD	FADD	TNFRSF1A	TNF	MAP3K5	DAB2IP
Apoptosis (04210_19)	BCL2	BAD	AKT3	AKT1	AKT2	TRAF2	ERN1	BAX	BAK1	BCL2L1	DAXX	MAP3K5	MAPK8	MAPK9	MAPK10	DAB2IP	JUN	FOS	TP53	FAS	FASLG	BCL2L11	BBC3	PMAIP1	CTSC	CTSB	CTSD	CTSH	CTSK	CTSL	CTSV	CTSO	CTSS	CTSW	CTSZ	CTSF	DDIT3	BID	HRK
Longevity regulating pathway (04211_5)	FOXO1	FOXO3	RPS6KB1	RPS6KB2	MTOR	RPTOR	AKT1S1	AKT3	AKT1	AKT2	PIK3CA	PIK3CB	PIK3CD	PIK3R1	PIK3R2	PIK3R3	PRKACA	PRKACB	PRKACG	ADCY1	ADCY2	ADCY3	ADCY5	ADCY6	ADCY7	ADCY8	ADCY9	ADCY4	PRKAG2	PRKAG3	PRKAA1	PRKAA2	PRKAB1	PRKAB2	PRKAG1	SOD2	TSC2	TSC1	RHEB	EIF4EBP1	STK11	SESN3	SESN1	SESN2	BAX	TP53	SIRT1	PPARGC1A	ULK1
Longevity regulating pathway - multiple species (04213_4)	FOXO3	RPS6KB1	RPS6KB2	MTOR	RPTOR	AKT3	AKT1	AKT2	PIK3CA	PIK3CB	PIK3CD	PIK3R1	PIK3R2	PIK3R3	IGF1R	IRS1	EIF4EBP2	SOD1	SOD2	CRYAB	HSPA1A	HSPA1B	HSPA1L	HSPA2	HSPA6	HSPA8	PRKAG2	PRKAG3	PRKAA1	PRKAA2	PRKAB1	PRKAB2	PRKAG1
Necroptosis (04217_6)	FAS	FASLG	FADD	FAF1	RIPK1
Necroptosis (04217_7)	CASP8	CFLAR	MLKL	CYLD	TLR3	FADD	TNFAIP3	EIF2AK2	RIPK3	RIPK1	TICAM1	TICAM2	HSP90AA1	HSP90AB1	ZBP1	USP21	PYGB	PYGL	PYGM	GLUL	GLUD1	GLUD2	SLC25A4	SLC25A5	SLC25A6	SLC25A31	SMPD1	PGAM5	NLRP3	MAPK8	MAPK9	MAPK10	FTH1	FTL	CAPN1	CAPN2	PLA2G4B	PLA2G4E	PLA2G4F	PLA2G4D	PLA2G4A	PLA2G4C	JMJD7-PLA2G4B	CAMK2A	CAMK2B	CAMK2D	CAMK2G	CYBB	SQSTM1
Necroptosis (04217_9)	TNFRSF1A	TRADD	TRAF2	TRAF5	BIRC2	BIRC3	XIAP	RIPK1	RBCK1	RNF31	SHARPIN	SPATA2L	SPATA2
Necroptosis (04217_12)	BID	AIFM1	BAX	CAPN1	CAPN2	PARP2	PARP3	PARP1	PARP4	BCL2
Cellular senescence (04218_2)	RASSF5	PPP1CA	PPP1CB	PPP1CC	HIPK3	HIPK4	HIPK1	HIPK2	CDKN2A	MDM2	TP53	PIK3CA	PIK3CB	PIK3CD	PIK3R1	PIK3R2	PIK3R3	AKT3	AKT1	AKT2	MTOR	FOXO3	RRAS2	MRAS	HRAS	KRAS	NRAS	RRAS	CDK4	CDK6	CCND1	CCND2	CCND3	CDKN1A	CDK2	CCNE1	CCNE2	RB1	RBL1	RBL2	MAPK14	MAPK11	MAPK13	MAPK12
Cellular senescence (04218_18)	CDKN1A	MAPK14	MAPK11	MAPK13	MAPK12	TP53	SIRT1	ATM	CHEK2	MRE11	RAD50	NBN	GADD45G	GADD45A	GADD45B	ATR	CHEK1	RAD9B	RAD9A	RAD1	HUS1	SQSTM1
Cellular senescence (04218_19)	TP53	FOXO3	CDK4	CDK6	CCND1	CCND2	CCND3	MAPK1	MAPK3	CDKN2A	CDKN1A	CDK2	CCNE1	CCNE2	RB1	RBL1	RBL2	MAPK14	MAPK11	MAPK13	MAPK12	MAP2K3	MAP2K6	CCNA2	CCNA1	SIRT1	CHEK2	GADD45G	GADD45A	GADD45B	ATR	CDC25A	CHEK1	CDK1	CCNB3	CCNB1	CCNB2
Cellular senescence (04218_22)	ATM	ATR	NFKB1	RELA	TRAF3IP2	GATA4	SQSTM1	IL1A
Cellular senescence (04218_27)	RB1	RBL1	RBL2	SMAD2	SMAD3	FOXO1	FOXO3	TGFBR1	TGFBR2	KIR2DL1	KIR2DL2	KIR2DL3	KIR2DL4	KIR2DL5A	HLA-A	HLA-B	HLA-C	HLA-E	HLA-F	HLA-G	PIK3CA	PIK3CB	PIK3CD	PIK3R1	PIK3R2	PIK3R3	CDK2	CCNE1	CCNE2	CDKN1A	CDKN2B	CDK4	CDK6	CCND1	CCND2	CCND3
Cellular senescence (04218_28)	PPP1CA	PPP1CB	PPP1CC	CDK4	CDK6	CCND1	CCND2	CCND3	CDK2	CCNE1	CCNE2	RB1	RBL1	RBL2	E2F1	E2F2	E2F3	E2F4	E2F5	SMAD2	SMAD3	FOXO1	FOXO3	KIR2DL1	KIR2DL2	KIR2DL3	KIR2DL4	KIR2DL5A	HLA-A	HLA-B	HLA-C	HLA-E	HLA-F	HLA-G	CDKN1A	CDKN2B
Adrenergic signaling in cardiomyocytes (04261_1)	CACNG3	CACNG2	CACNG5	CACNG4	CACNA2D3	CACNG8	CACNG7	CACNG6	CACNA1C	CACNA1D	CACNA1F	CACNA1S	CACNA2D1	CACNB1	CACNB2	CACNB3	CACNB4	CACNG1	CACNA2D2	CACNA2D4	RYR2	SLC8A1	ATP2A2	TNNC1	TNNT2	TNNI3	TPM1	TPM2	TPM3	TPM4	ATP1B4	ATP1A1	ATP1A2	ATP1A3	ATP1A4	ATP1B1	ATP1B2	ATP1B3	FXYD2	SLC9A1	PRKACA	PRKACB	PRKACG	CREB3	CREB1	ATF2	ATF6B	CREB3L4	ATF4
Adrenergic signaling in cardiomyocytes (04261_5)	ADRB1	ADRB2	GNAS	GNAI1	GNAI2	GNAI3	PIK3R6	PIK3R5	PIK3CG	AKT3	AKT1	AKT2	MAPK1	MAPK3
Adrenergic signaling in cardiomyocytes (04261_6)	PPP1R1A	AGTR1	AGTR2	GNAQ	PLCB1	PLCB2	PLCB3	PLCB4	PRKCA	ADRA1D	ADRA1B	ADRA1A	MAPK1	MAPK3
Adrenergic signaling in cardiomyocytes (04261_8)	ADRB1	ADRB2	GNAS	ADCY1	ADCY2	ADCY3	ADCY5	ADCY6	ADCY7	ADCY8	ADCY9	ADCY4	RAPGEF3	RAPGEF4	MAPK14	MAPK11	MAPK13	MAPK12
Vascular smooth muscle contraction (04270_2)	MYLK4	MYLK	MYLK2	MYLK3	MYL9	MYL6B	MYL6	PPP1R12A	PPP1R12B	PPP1R12C	PPP1CA	PPP1CB	PPP1CC	ROCK1	ROCK2	ACTA2	ACTG2	CALML6	CALML5	CALM1	CALM2	CALM3	CALML3	CALML4	PPP1R14A	MYH11
Vascular smooth muscle contraction (04270_4)	PRKCA	PRKCB	PRKCD	PRKCE	PRKCG	PRKCH	PRKCQ	ADRA1D	ADRA1B	ADRA1A	GNA11	GNAQ	PLCB1	PLCB2	PLCB3	PLCB4	ITPR1	ITPR2	ITPR3	PLA2G4B	PLA2G4E	PLA2G4F	PLA2G2D	PLA2G4D	PLA2G2E	PLA2G2C	PLA2G3	PLA2G1B	PLA2G2A	PLA2G4A	PLA2G5	PLA2G2F	PLA2G12A	PLA2G6	PLA2G10	PLA2G12B	PLA2G4C	JMJD7-PLA2G4B	ARAF	RAF1	BRAF	AGTR1	EDNRA	AVPR1A	AVPR1B
Vascular smooth muscle contraction (04270_8)	ROCK1	ROCK2	RHOA	ARHGEF12	ARHGEF1	ARHGEF11	ADRA1D	ADRA1B	ADRA1A	GNA13	GNA12	AGTR1	EDNRA	AVPR1A	AVPR1B
Vascular smooth muscle contraction (04270_9)	PPP1R12A	PPP1R12B	PPP1R12C	PPP1CA	PPP1CB	PPP1CC	MYL9	MYL6B	MYL6	ACTA2	ACTG2	NPR1	ADCY1	ADCY2	ADCY3	ADCY5	ADCY6	ADCY7	ADCY8	ADCY9	ADCY4	PRKACA	PRKACB	PRKACG	PRKG1	GUCY1A2	GUCY1A1	GUCY1B1	MYLK4	MYLK	MYLK2	MYLK3	ITPR1	ITPR2	ITPR3	KCNMB2	KCNU1	KCNMB3	KCNMB4	KCNMA1	KCNMB1	MRVI1
Vascular smooth muscle contraction (04270_13)	ADORA2A	ADORA2B	ADCY1	ADCY2	ADCY3	ADCY5	ADCY6	ADCY7	ADCY8	ADCY9	ADCY4	PRKACA	PRKACB	PRKACG	MYLK4	MYLK	MYLK2	MYLK3	ITPR1	ITPR2	ITPR3	KCNMB2	KCNU1	KCNMB3	KCNMB4	KCNMA1	KCNMB1	GNAS	PTGIR	CALCRL	RAMP2	RAMP1	RAMP3
Wnt signaling pathway (04310_1)	NFATC1	NFATC2	NFATC3	NFATC4	PRKCA	PRKCB	PRKCG	PPP3CA	PPP3CB	PPP3CC	PPP3R1	PPP3R2	CAMK2A	CAMK2B	CAMK2D	CAMK2G	PLCB1	PLCB2	PLCB3	PLCB4	FZD10	FZD2	FZD5	FZD3	FZD1	FZD4	FZD6	FZD7	FZD8	FZD9	WNT5A	WNT5B
Wnt signaling pathway (04310_7)	MMP7	PPARD	CCND1	CCND2	CCND3	FOSL1	JUN	MYC	CTBP1	CTBP2	SOX17	SMAD4	LEF1	TCF7	TCF7L2	TCF7L1	CREBBP	EP300	RUVBL1	CHD8	CTNNBIP1	NLK	CSNK1A1L	CSNK1A1	SKP1	FBXW11	BTRC	TBL1X	TBL1XR1	TBL1Y	CACYBP	SIAH1	TP53	AXIN1	AXIN2	APC2	APC	CTNNB1	PRKACA	PRKACB	PRKACG	PSEN1	GSK3B	FRAT1	FRAT2	DVL1	DVL2	DVL3	CSNK1E
Wnt signaling pathway (04310_8)	RAC1	RAC2	RAC3	DAAM1	DAAM2	DVL1	DVL2	DVL3	PRICKLE1	PRICKLE2	PRICKLE4	PRICKLE3	FZD10	FZD2	FZD5	FZD3	FZD1	FZD4	FZD6	FZD7	FZD8	FZD9	VANGL2	VANGL1	NKD1	NKD2	AXIN1	AXIN2	APC2	APC	GSK3B	FRAT1	FRAT2	SENP2	CSNK2A1	CSNK2A2	CSNK2B	CXXC4	BAMBI	INVS
Wnt signaling pathway (04310_10)	DVL1	DVL2	DVL3	CSNK1A1L	CSNK1A1	TBL1X	TBL1XR1	TBL1Y	NKD1	NKD2	AXIN1	AXIN2	APC2	APC	CTNNB1	PRKACA	PRKACB	PRKACG	GSK3B	FRAT1	FRAT2	SENP2	CSNK2A1	CSNK2A2	CSNK2B	CXXC4	CSNK1E	LRP6	LRP5	FZD10	FZD2	FZD5	FZD3	FZD1	FZD4	FZD6	FZD7	FZD8	FZD9	SFRP1	SFRP2	SFRP4	SFRP5	WNT16	WNT4	WNT1	WNT2	WNT3	WNT5A
Notch signaling pathway (04330_1)	NCSTN	APH1A	APH1B	PSEN1	PSEN2	HDAC1	HDAC2	CIR1	CTBP1	CTBP2	NCOR2	PTCRA	HES1	HES5	RBPJL	RBPJ	SNW1	CREBBP	EP300	KAT2A	KAT2B	MAML3	MAML2	MAML1	ADAM17	PSENEN	DTX2	DTX3L	DTX1	DTX3	DTX4	NUMB	NUMBL	JAG1	JAG2	NOTCH1	NOTCH2	NOTCH3	NOTCH4	DVL1	DVL2	DVL3	LFNG	MFNG	RFNG	DLL3	DLL1	DLL4
Hedgehog signaling pathway (04340_4)	SMO	GLI1	GLI2	GLI3	KIF7	SUFU	EVC2	EVC	GRK2	GRK3	CSNK1A1L	CSNK1A1	CSNK1D	CSNK1E	CSNK1G2	CSNK1G3	CSNK1G1	GPR161	ARRB1	ARRB2	KIF3A	PRKACA	PRKACB	PRKACG
Hedgehog signaling pathway (04340_5)	GLI1	GLI2	GLI3	PTCH1	PTCH2	HHIP	SPOPL	SPOP	CUL3	CCND1	CCND2	BCL2
Hedgehog signaling pathway (04340_6)	PTCH1	PTCH2	GAS1	LRP2	CDON	BOC	IHH	DHH	SHH	HHIP
TGF-beta signaling pathway (04350_1)	LTBP1	THBS1	NODAL	ACVR2A	ACVR2B	INHBA	INHBB	INHBC	INHBE	FST	LEFTY1	LEFTY2	PPP2CA	PPP2CB	PPP2R1A	PPP2R1B	RHOA	SMURF1	SMURF2	TGFBR2	TGFB1	TGFB2	TGFB3	DCN
TGF-beta signaling pathway (04350_2)	CUL1	RBX1	SMAD4	ZFYVE9	ZFYVE16	SMAD2	SMAD3	SKP1	SMAD6	SMAD7	SMURF1	SMURF2	TGFBR2	TGFBR1	TNF	IFNG	BMPR1A	BMPR1B	ACVR1	SMAD1	SMAD5	SMAD9
TGF-beta signaling pathway (04350_5)	SP1	CREBBP	EP300	CDKN2B	MYC	TFDP1	E2F4	E2F5	RBL1
TGF-beta signaling pathway (04350_7)	LTBP1	INHBA	INHBB	INHBC	INHBE	LEFTY1	LEFTY2	RPS6KB1	RPS6KB2	PPP2CA	PPP2CB	PPP2R1A	PPP2R1B	ROCK1	RHOA	SMAD6	SMAD7	SMURF1	SMURF2	TGFBR2	TGFBR1	TGFB1	TGFB2	TGFB3	DCN
Axon guidance (04360_4)	MAPK1	MAPK3	ITGB1	PTK2	SEMA7A	PLXNC1
Axon guidance (04360_5)	RAC1	RAC2	RAC3	PAK4	PAK1	PAK2	PAK3	PAK6	PAK5	RHOA	ARHGEF12	MET	PLXNB2	PLXNB1	PLXNB3	SEMA4F	SEMA4D	SEMA4B	SEMA4C	SEMA4G	SEMA4A	RND1	RRAS
Axon guidance (04360_6)	RAC1	RAC2	RAC3	ROCK1	ROCK2	RHOA	CDC42	NGEF	RASA1	ABL1	EPHA2	EPHA1	EPHA3	EPHA4	EPHA5	EPHA7	EPHA8	EPHA6	EFNB1	EFNB2	EFNB3	EPHB1	EPHB2	EPHB3	EPHB4	EPHB6	EFNA1	EFNA2	EFNA3	EFNA4	EFNA5	PAK4	PAK1	PAK2	PAK3	PAK6	PAK5
Axon guidance (04360_7)	RAC1	RAC2	RAC3	DCC	NCK1	RHOA	NTN1	PLCG1	PLCG2	PAK4	PAK1	PAK2	PAK3	PAK6	PAK5	PTK2	SRC	FYN	CDC42
Axon guidance (04360_9)	DCC	NFATC2	NFATC3	NFATC4	PPP3CA	PPP3CB	PPP3CC	PPP3R1	PPP3R2	NCK1	NTN1	PLCG1	PLCG2	PTK2
Axon guidance (04360_11)	SLIT2	SLIT1	CDC42	ROBO3	ROBO1	ROBO2	SRGAP2	SRGAP1	SRGAP3	ABL1	ENAH	NCK2	PAK4	PAK1	PAK2	PAK3	PAK6	PAK5	RAC1	RAC2	RAC3
Axon guidance (04360_12)	GNAI1	GNAI2	GNAI3	PTK2	NGEF	RASA1	ABL1	EFNB1	EFNB2	EFNB3	EPHB1	EPHB2	EPHB3	EPHB4	EPHB6	RGS3	NCK2
Axon guidance (04360_17)	DCC	PPP3CA	PPP3CB	PPP3CC	PPP3R1	PPP3R2	NCK1	UNC5D	UNC5B	UNC5C	UNC5A	NTN1	PLCG1	PLCG2	PAK4	PAK1	PAK2	PAK3	PAK6	PAK5	PTK2	SRC	FYN
Axon guidance (04360_20)	PLXNA1	PLXNA2	PLXNA3	PLXNA4	SEMA3A	SEMA3C	SEMA3D	SEMA3G	SEMA3F	SEMA3B	SEMA3E	NRP1	L1CAM	RAC1	RAC2	RAC3	FYN	PAK4	PAK1	PAK2	PAK3	PAK6	PAK5	DPYSL2	RHOD	DPYSL5	RND1	CDK5	FES	RHOA
Axon guidance (04360_24)	PTCH1	SHH	FYN	SRC	BOC	SMO
Axon guidance (04360_27)	PARD6A	PARD6G	PARD6B	PARD3	FZD3	PIK3CA	PIK3CB	PIK3CD	PIK3R1	PIK3R2	PIK3R3	GSK3B	PDK1	PRKCZ
Axon guidance (04360_31)	BMP7	BMPR1B	BMPR2	GDF7	LIMK1	PPP3CA	PPP3CB	PPP3CC	PPP3R1	PPP3R2	TRPC1	TRPC3	TRPC4	TRPC5	TRPC6	SSH1	SSH3	SSH2
VEGF signaling pathway (04370_1)	CDC42	KDR	PLCG1	PLCG2	SPHK2	SPHK1	PLA2G4B	PLA2G4E	PLA2G4F	PLA2G4D	PLA2G4A	PLA2G4C	JMJD7-PLA2G4B	PPP3CA	PPP3CB	PPP3CC	PPP3R1	PPP3R2	AKT3	AKT1	AKT2	PIK3CA	PIK3CB	PIK3CD	PIK3R1	PIK3R2	PIK3R3	NFATC2	PRKCA	PRKCB	PRKCG	PTK2	PXN	SH2D2A	SRC	SHC2	VEGFA	MAPK1	MAPK3	RAF1	NOS3	CASP9	BAD	RAC1	RAC2	RAC3
VEGF signaling pathway (04370_5)	CDC42	KDR	HSPB1	MAPKAPK3	MAPKAPK2	MAPK14	MAPK11	MAPK13	MAPK12
Apelin signaling pathway (04371_1)	APLNR	GNB5	GNAI1	GNAI2	GNAI3	GNB1	GNB2	GNB3	GNG3	GNG4	GNG5	GNG7	GNG10	GNG11	GNGT1	GNGT2	GNG13	GNG2	GNG12	GNB4	GNG8	PIK3R6	PIK3R5	PIK3CG	AKT3	AKT1	AKT2	MAPK1	MAPK3	PLCB1	PLCB2	PLCB3	PLCB4	ITPR1	ITPR2	ITPR3	RYR1	RYR2	RYR3	RRAS2	MRAS	HRAS	KRAS	NRAS	RRAS	MYLK4	MYLK	MYLK2	MYLK3
Apelin signaling pathway (04371_7)	AKT3	AKT1	AKT2	MAP2K1	MAP2K2	MAPK1	MAPK3	MTOR	PRKCE	RPS6KB1	RPS6KB2	RPS6	SLC9A1
Apelin signaling pathway (04371_16)	MEF2B	MEF2A	BORCS8-MEF2B	MEF2C	MEF2D	HDAC5	HDAC4	KLF2	GNA13	GNB5	GNB1	GNB2	GNB3	GNG3	GNG4	GNG5	GNG7	GNG10	GNG11	GNGT1	GNGT2	GNG13	GNG2	GNG12	GNB4	GNG8	CAMK4
Osteoclast differentiation (04380_3)	TRAF2	TRAF6	TNFRSF11A	TNFSF11	CYLD	GAB2	MAP3K14	CHUK	IKBKB	MAP3K7	TAB1	TAB2	MAP2K6	MAP2K1	FYN	LCK	PIK3CA	PIK3CB	PIK3CD	PIK3R1	PIK3R2	PIK3R3	IL1A	IL1B	IL1R1	IFNGR1	IFNGR2	STAT1	FCGR1A	FCGR2A	FCGR2B	FCGR3A	FCGR3B	FCGR2C	TYROBP	BTK	TEC	PLCG2	TNF	TNFRSF1A	FHL2	SQSTM1	MAP2K7	RAC1	CYBA	NOX1	NCF2	NCF4	NCF1
Osteoclast differentiation (04380_6)	TRAF2	TRAF6	TNFRSF11A	CYLD	GAB2	MAP3K14	IKBKB	NFKBIA	MAP3K7	TAB1	TAB2	MAP2K6	MAP2K1	MAPK8	MAPK9	MAPK10	MAPK14	MAPK11	MAPK13	MAPK12	FYN	LCK	IL1R1	STAT1	TNFRSF1A	FHL2	SQSTM1	MAP2K7	RAC1
Osteoclast differentiation (04380_7)	TRAF2	TRAF6	IKBKB	MAP3K7	MAP2K6	MAP2K1	MAPK8	MAPK9	MAPK10	MAPK14	MAPK11	MAPK13	MAPK12	FOS	FOSB	FOSL2	JUN	JUNB	JUND	FOSL1	MAP2K7
Osteoclast differentiation (04380_11)	TRAF2	TRAF6	TNFRSF11A	TNFSF11	GAB2	FCGR1A	FCGR2A	FCGR2B	FCGR3A	FCGR3B	FCGR2C	TYROBP	BTK	TEC	SYK	BLNK	LCP2	PLCG2	PPP3CA	PPP3CB	PPP3CC	PPP3R1	PPP3R2	CAMK4	LILRB2	LILRB1	LILRB5	LILRB4	LILRA1	LILRB3	LILRA3	LILRA2	OSCAR	LILRA4	LILRA5	LILRA6	SIRPB1	SIRPA	TREM2	SIRPG
Osteoclast differentiation (04380_12)	TRAF2	TRAF6	TNFRSF11A	TNFSF11	CYLD	GAB2	MAP3K14	MAP3K7	TAB1	TAB2	FYN	LCK	IL1R1	STAT1	FCGR1A	FCGR2A	FCGR2B	FCGR3A	FCGR3B	FCGR2C	TYROBP	BTK	TEC	SYK	BLNK	LCP2	PLCG2	PPP3CA	PPP3CB	PPP3CC	PPP3R1	PPP3R2	CAMK4	TNFRSF1A	FHL2	SQSTM1	RAC1
Osteoclast differentiation (04380_15)	CSF1R	CSF1	FYN	LCK	PIK3CA	PIK3CB	PIK3CD	PIK3R1	PIK3R2	PIK3R3	AKT3	AKT1	AKT2	GRB2	MAPK1	MAPK3
Hippo signaling pathway (04390_1)	WWC1	NF2	FRMD6	FRMD1	SAV1	STK3	LATS2	LATS1	RASSF1	PPP1CA	PPP1CB	PPP1CC	TP53BP2	MOB1A	MOB1B	LLGL2	LLGL1	SCRIB	DLG1	DLG2	DLG3	DLG4	WTIP	AJUBA	LIMD1	ACTB	ACTG1	YAP1	WWTR1	CSNK1D	CSNK1E	FBXW11	BTRC	PPP2CA	PPP2CB	PPP2R1A	PPP2R1B	PPP2R2A	PPP2R2B	PPP2R2C	PPP2R2D	RASSF6
Hippo signaling pathway (04390_2)	YAP1	WWTR1	CCN2	TEAD1	TEAD4	TEAD3	TEAD2	GLI2
Hippo signaling pathway (04390_5)	BIRC5	AREG	ITGB2	YAP1	WWTR1	AFP	FGF1
Hippo signaling pathway (04390_6)	YAP1	WWTR1	AMOT	MPP5	PATJ
Hippo signaling pathway (04390_11)	YAP1	WWTR1	SMAD2	SMAD3	SMAD4	SMAD7	SERPINE1	CCN2
Hippo signaling pathway (04390_12)	TGFB1	TGFB2	TGFB3	TGFBR1	TGFBR2	SMAD2	SMAD3	SMAD4	GDF7	AMH	BMP8A	GDF6	BMP2	BMP4	BMP5	BMP6	BMP7	BMP8B	GDF5	BMPR1A	BMPR1B	BMPR2	SMAD1	SMAD7	YAP1
Hippo signaling pathway (04390_14)	FZD10	FZD2	FZD5	FZD3	FZD1	FZD4	FZD6	FZD7	FZD8	FZD9	CSNK1D	CSNK1E	DVL1	DVL2	DVL3	GSK3B	CTNNB1	APC2	APC	AXIN1	AXIN2	LEF1	TCF7	TCF7L2	TCF7L1	WWTR1	YWHAQ	YWHAB	YWHAE	YWHAG	YWHAH	YWHAZ
Hippo signaling pathway (04390_15)	CSNK1D	CSNK1E	DVL1	DVL2	DVL3	GSK3B	CTNNB1	APC2	APC	AXIN1	AXIN2	LEF1	TCF7	TCF7L2	TCF7L1	NKD1	MYC	CCND1	CCND2	CCND3	SOX2	SNAI2	BIRC2	BIRC5
Hippo signaling pathway (04390_16)	GSK3B	CTNNB1	LEF1	TCF7	TCF7L2	TCF7L1	TEAD1	TEAD4	TEAD3	TEAD2	YAP1	AXIN1	AXIN2	NKD1	MYC	CCND1	CCND2	CCND3	SOX2	SNAI2	BIRC2	BIRC5
Focal adhesion (04510_2)	ITGB1	ITGB3	ITGB4	ITGB5	ITGB6	ITGB7	ITGB8	ITGA11	ITGA6	ITGA1	ITGA2	ITGA2B	ITGA3	ITGA4	ITGA5	ITGA7	ITGA9	ITGAV	ITGA10	ITGA8	CDC42	MYLK4	MYLK	MYLK2	MYLK3	MYL12B	MYL9	MYL12A	MYLPF	MYL2	MYL5	MYL7	MYL10	DIAPH1	PPP1R12A	PPP1R12B	PPP1R12C	PPP1CA	PPP1CB	PPP1CC	ROCK1	ROCK2	PARVB	PARVA	PARVG	ILK	VCL	VASP	TLN1
Focal adhesion (04510_8)	BIRC2	BIRC3	XIAP	BAD	BCL2	ELK1	MAPK1	MAPK3	CCND1	CCND2	CCND3	MAP2K1	BRAF	RAF1	PAK4	PAK1	PAK2	PAK3	PAK6	PAK5
Focal adhesion (04510_9)	CDC42	MYLK4	MYLK	MYLK2	MYLK3	MYL12B	MYL9	MYL12A	MYLPF	MYL2	MYL5	MYL7	MYL10	PIK3CA	PIK3CB	PIK3CD	PIK3R1	PIK3R2	PIK3R3	BAD	MAPK1	MAPK3	MAP2K1	BRAF	RAF1	HRAS	RAP1A	RAP1B	DOCK1	MAPK8	MAPK9	MAPK10	PAK4	PAK1	PAK2	PAK3	PAK6	PAK5	RAC1	RAC2	RAC3	VAV3	VAV1	VAV2	ACTB	ACTG1
Focal adhesion (04510_14)	ITGB1	ITGB3	ITGB4	ITGB5	ITGB6	ITGB7	ITGB8	ITGA11	ITGA6	ITGA1	ITGA2	ITGA2B	ITGA3	ITGA4	ITGA5	ITGA7	ITGA9	ITGAV	ITGA10	ITGA8	FLNA	FLNB	FLNC	AKT3	AKT1	AKT2	PDPK1	PARVB	PARVA	PARVG	ILK	VCL	VASP	PTEN	PIK3CA	PIK3CB	PIK3CD	PIK3R1	PIK3R2	PIK3R3	TLN1	TLN2	ACTN4	ACTN1	PTK2	CAPN2	PXN	ARHGAP35	ARHGAP5
Focal adhesion (04510_17)	AKT3	AKT1	AKT2	ELK1	CCND1	CCND2	CCND3	MAP2K1	RAP1A	RAP1B	MAPK8	MAPK9	MAPK10	JUN	RAC1	RAC2	RAC3	CTNNB1
Cell adhesion molecules (CAMs) (04514_45)	SELE	GLG1	SELP	SELPLG
Cell adhesion molecules (CAMs) (04514_52)	ICAM3	ICAM1	ICAM2	JAM3	ITGB2	ITGAM	ITGAL	F11R
Cell adhesion molecules (CAMs) (04514_54)	VCAM1	ITGB7	ITGA9	ITGB1	ITGA4	JAM2	JAM3
Cell adhesion molecules (CAMs) (04514_84)	ICOS	ICOSLG	CD80	CTLA4	CD28	CD86	CD274
Cell adhesion molecules (CAMs) (04514_90)	CD226	NECTIN2	PVR	TIGIT	NECTIN3
Adherens junction (04520_1)	SMAD4	SMAD2	SMAD3	SNAI1	TGFBR1	TGFBR2	FGFR1
Adherens junction (04520_2)	CTNNA1	CTNNA2	CTNNA3	CTNND1	CDH1	LEF1	TCF7	TCF7L2	TCF7L1	YES1	FYN	FER	MAPK1	MAPK3	EGFR	ERBB2	MET	IGF1R	ACTB	ACTG1	TJP1	VCL	ACTN4	ACTN1	AFDN	CTNNB1	IQGAP1	SRC
Adherens junction (04520_9)	RHOA	WASF2	WASF3	WASF1	BAIAP2	WAS	WASL	RAC1	RAC2	RAC3	CDC42	ACTB	ACTG1	CTNNA1	CTNNA2	CTNNA3	TJP1	VCL	SORBS1	ACTN4	ACTN1	SSX2IP	LMO7	AFDN	IQGAP1	NECTIN3	NECTIN1	NECTIN2	NECTIN4	SRC	PARD3	FARP2
Adherens junction (04520_10)	CDH1	CSNK2A1	CSNK2A2	CSNK2B	PTPN1	PTPRF	PTPRB	PTPRM	ACP1	RHOA	WASF2	WASF3	WASF1	BAIAP2	WAS	WASL	ACTB	ACTG1	CTNNA1	CTNNA2	CTNNA3	TJP1	VCL	SORBS1	ACTN4	ACTN1	SSX2IP	LMO7	AFDN	IQGAP1	CTNNB1
Gap junction (04540_2)	PRKCA	PRKCB	PRKCG	GJA1	GJD2	MAPK7	MAP3K2	MAP2K5	PRKG1	PRKG2	CDK1	PRKACA	PRKACB	PRKACG	TJP1	ADCY1	ADCY2	ADCY3	ADCY5	ADCY6	ADCY7	ADCY8	ADCY9	ADCY4	SRC	GUCY1A2	GUCY1A1	GUCY1B1	MAPK1	MAPK3	MAP2K1	MAP2K2	EGFR	PDGFRA	PDGFRB	PLCB1	PLCB2	PLCB3	PLCB4	ITPR1	ITPR2	ITPR3
Gap junction (04540_3)	GNAI1	GNAI2	GNAI3	LPAR1	MAP2K1	MAP2K2	RAF1	HRAS	KRAS	NRAS	SOS1	SOS2	GRB2
Gap junction (04540_8)	PRKCA	PRKCB	PRKCG	GJA1	GJD2	MAPK7	MAP3K2	MAP2K5	PRKG1	PRKG2	CDK1	PRKACA	PRKACB	PRKACG	TJP1	SRC	MAPK1	MAPK3	GRB2	EGFR	PDGFRA	PDGFRB	EGF	PDGFA	PDGFB	PDGFC	PDGFD
Signaling pathways regulating pluripotency of stem cells (04550_2)	APC2	APC	AXIN1	AXIN2	DVL1	DVL2	DVL3	CTNNB1	GSK3B	HNF1A	TCF3	ESRRB
Signaling pathways regulating pluripotency of stem cells (04550_7)	KLF4	TBX3	NANOG	POU5F1	POU5F1B	SOX2	MAPK1	MAPK3
Signaling pathways regulating pluripotency of stem cells (04550_9)	BMP4	BMPR1A	BMPR1B	BMPR2	ACVR1	MAPK1	MAPK3	MAPK14	MAPK11	MAPK13	MAPK12	SMAD1	SMAD5	SMAD9	ID1	ID2	ID3	ID4	DUSP9	SMAD4
Signaling pathways regulating pluripotency of stem cells (04550_10)	JAK1	JAK2	JAK3	STAT3	KLF4	NANOG	POU5F1	POU5F1B	SOX2	MYC
Signaling pathways regulating pluripotency of stem cells (04550_14)	INHBA	INHBB	INHBC	INHBE	ACVR1C	ACVR1B	ACVR2A	ACVR2B	SMAD2	SMAD3	SMAD4	NODAL
Signaling pathways regulating pluripotency of stem cells (04550_18)	IL6ST	LIFR	TBX3	GRB2	MAP2K1	MAP2K2	MAPK1	MAPK3	DUSP9
Complement and coagulation cascades (04610_5)	F10	F13A1	F13B	F2R	SERPIND1	SERPINC1	VWF	SERPINA5	SERPINE1	SERPINB2	PROS1	PROC	THBD	SERPINA1	F2	A2M	SERPINF2	F5	F8	CPB2	F2RL2	F2RL3	PROCR
Complement and coagulation cascades (04610_7)	F12	F11	SERPINE1	SERPINB2	PLG	KNG1	KLKB1	PLAU	PLAT	SERPINC1	PLAUR
Platelet activation (04611_1)	ITPR1	ITPR2	ITPR3	PLCB1	PLCB2	PLCB3	PLCB4	GP6	ITGA2	ITGB1	GP5	PLCG2	RASGRP1	RASGRP2	PIK3CA	PIK3CB	PIK3CD	PIK3R1	PIK3R2	PIK3R3	AKT3	AKT1	AKT2	NOS3	VWF	COL1A1	COL1A2	COL3A1	GP1BA	GP1BB	GP9	FCER1G	LYN	FYN	LCP2	BTK	SYK	PRKCI	PRKCZ
Platelet activation (04611_14)	F2R	F2RL3	TBXA2R	GNA13	ARHGEF12	ARHGEF1	RHOA	ROCK1	ROCK2
Platelet activation (04611_22)	TLN1	TLN2	ITGA2B	ITGB3	ACTB	ACTG1	FGA	FGB	FGG	FERMT3	GNA13	SRC	FCGR2A	ARHGAP35
Platelet activation (04611_23)	ITPR1	ITPR2	ITPR3	PLCB1	PLCB2	PLCB3	PLCB4	ITGA2	ITGB1	GP5	PLCG2	RASGRP1	RASGRP2	RAP1A	RAP1B	PIK3CA	PIK3CB	PIK3CD	PIK3R1	PIK3R2	PIK3R3	AKT3	AKT1	AKT2	GNAQ	MYLK4	MYLK	MYLK2	MYLK3	ADCY1	ADCY2	ADCY3	ADCY5	ADCY6	ADCY7	ADCY8	ADCY9	ADCY4	PLA2G4B	PLA2G4E	PLA2G4F	PLA2G4D	PLA2G4A	PLA2G4C	JMJD7-PLA2G4B	PRKACA	PRKACB	PRKACG	GP1BA
Platelet activation (04611_24)	ITGA2B	ITGB3	GNA13	SRC	SYK	FCGR2A	ARHGAP35	RHOA
Antigen processing and presentation (04612_1)	CD74	HLA-DMA	HLA-DMB	CTSB	CTSL	CTSS	LGMN
Antigen processing and presentation (04612_4)	KIR2DS2	KIR3DL3	KIR2DL1	KIR2DL2	KIR2DL3	KIR2DL4	KIR2DS1	KIR2DS3	KIR2DS4	KIR2DS5	KIR3DL1	KIR3DL2	KLRC1	KLRC2	KLRC3	KLRD1	KIR2DL5A	KLRC4	CD8A	CD8B	TAPBP	HLA-A	HLA-B	HLA-C	HLA-E	HLA-F	HLA-G
Toll-like receptor signaling pathway (04620_1)	IFNB1	CXCL11	CXCL10	STAT1	IRF3	CXCL9	IFNAR1	IFNAR2
Toll-like receptor signaling pathway (04620_4)	MYD88	IRF5	MAP3K7	IRAK1	TIRAP	TRAF6	FADD	TLR2	TLR5	TLR9	TLR4	IRAK4	TLR7	TLR8
Toll-like receptor signaling pathway (04620_5)	MYD88	TRAF6	TRAF3	RIPK1	IKBKB	MAP3K7	TAB1	TLR3	TLR4	TICAM2	TICAM1	MAP2K7	MAP2K4	MAP2K3	MAP2K6
Toll-like receptor signaling pathway (04620_10)	CHUK	TRAF6	IRAK1	IRAK4	SPP1	IRF7	IRF5	IFNB1	IFNA1	IFNA2	IFNA4	IFNA5	IFNA6	IFNA7	IFNA8	IFNA10	IFNA13	IFNA14	IFNA16	IFNA17	IFNA21	CXCL8	IL1B	TBK1	IKBKE	IL6	CCL5	TNF	CCL3L3	CCL3	CCL3L1	IL12A	IL12B	CCL4L1	CCL4	CCL4L2
Toll-like receptor signaling pathway (04620_12)	CHUK	TRAF6	IRAK1	SPP1	TRAF3	IRF7	CXCL11	CXCL10	IFNB1	IFNA1	IFNA2	IFNA4	IFNA5	IFNA6	IFNA7	IFNA8	IFNA10	IFNA13	IFNA14	IFNA16	IFNA17	IFNA21	CD86	CD40	TBK1	IKBKE	IRF3	CD80	TICAM1	CXCL9
Toll-like receptor signaling pathway (04620_15)	TRAF6	MYD88	RIPK1	IRF5	IKBKB	MAP3K7	MAPK14	MAPK11	MAPK13	MAPK12	IRAK1	CXCL8	TIRAP	MAPK8	MAPK9	MAPK10	IL1B	IL6	CCL5	TAB1	NFKBIA	TNF	IRAK4	CCL3L3	CCL3	CCL3L1	MAP2K7	MAP2K4	NFKB1	RELA	MAP2K3	MAP2K6	FOS	JUN	IL12A	IL12B	CCL4L1	CCL4	CCL4L2
Toll-like receptor signaling pathway (04620_16)	MYD88	IRAK1	RAC1	TRAF6	FADD	TLR2	TLR1	TLR6	TOLLIP	TIRAP	IRAK4	CASP8
Toll-like receptor signaling pathway (04620_17)	MYD88	RAC1	AKT3	AKT1	AKT2	TLR2	TLR1	TLR6	TOLLIP	TIRAP	PIK3CA	PIK3CB	PIK3CD	PIK3R1	PIK3R2	PIK3R3
Toll-like receptor signaling pathway (04620_21)	MYD88	TRAF6	RIPK1	IRF5	MAP3K7	IRAK1	TIRAP	FADD	LY96	TLR4	TICAM2	CD14	IRAK4
NOD-like receptor signaling pathway (04621_1)	PYCARD	CASP1	AIM2	TP53BP1	NA	IFI16
NOD-like receptor signaling pathway (04621_3)	PYCARD	CASP1	MEFV	RHOA
NOD-like receptor signaling pathway (04621_4)	PYCARD	CASP1	NLRP3	CARD8	SUGT1	HSP90AA1	HSP90AB1	PYDC2	MEFV	ITPR1	ITPR2	ITPR3	PLCB1	PLCB2	PLCB3	PLCB4	GSDMD	CASP4	MAVS	NEK7	BRCC3	PYDC1	TXNIP	TXN2	TXN	CASP5	MFN1	MFN2	DHX33	CTSB
NOD-like receptor signaling pathway (04621_5)	PYCARD	CASP1	NLRP3	CARD8	SUGT1	HSP90AA1	HSP90AB1	PYDC2	MEFV	PSTPIP1	ITPR1	ITPR2	ITPR3	GSDMD	MAVS	NEK7	BRCC3	CASP12	PYDC1	TXNIP	CARD16	CARD17	CARD18	CASP8	CTSB
NOD-like receptor signaling pathway (04621_6)	NOD1	NOD2	RIPK2	CHUK	IKBKB	MAP3K7	TAB1	TAB2	TAB3	MAPK8	MAPK9	MAPK10	MAPK1	MAPK3	MAPK14	MAPK11	MAPK13	MAPK12	IKBKG	TRAF3	BIRC2	BIRC3	XIAP	TNFAIP3	TRAF2	TRAF5	TRAF6	CARD9
NOD-like receptor signaling pathway (04621_9)	NLRP1	PYCARD	CASP1	NOD2	BCL2	BCL2L1
NOD-like receptor signaling pathway (04621_13)	CHUK	IKBKB	MAP3K7	TAB1	TAB2	TAB3	MAPK8	MAPK9	MAPK10	MAPK1	MAPK3	MAPK14	MAPK11	MAPK13	MAPK12	JUN	IKBKG	NFKB1	RELA	NFKBIA	NFKBIB	IL18	IL6	TNF	CXCL8	CXCL1	CXCL2	CXCL3	CCL2	CCL5	IL1B	CAMP
NOD-like receptor signaling pathway (04621_15)	NOD1	NOD2	RIPK2	TAB1	TAB2	TAB3	TRAF3	TBK1	IKBKE	IRF3	IRF7	BIRC2	BIRC3	XIAP	MAVS	TANK	TNFAIP3	TRAF2	TRAF5	TRAF6	NLRX1	CARD9
NOD-like receptor signaling pathway (04621_20)	IRAK4	TLR4	MYD88	TICAM1	IRF3	IRF7
NOD-like receptor signaling pathway (04621_21)	NOD1	NOD2	RIPK2	TAB1	TAB2	TAB3	IKBKG	TRAF3	SUGT1	ERBIN	BIRC2	BIRC3	XIAP	RBCK1	RNF31	SHARPIN	ATG16L1	GABARAP	GABARAPL2	GABARAPL1	ATG12	ATG5	TNFAIP3	CARD6	TRIP6	TRAF2	TRAF5	TRAF6	CARD9
RIG-I-like receptor signaling pathway (04622_1)	DDX58	IFIH1	TRIM25	RNF125	MAVS	OTUD5	TRAF3	TANK	FADD	TRAF6	DHX58	ISG15	ATG5	ATG12	NLRX1	TMEM173	CYLD	TRADD	RIPK1	TKFC	MAP3K1	TRAF2	MAP3K7
RIG-I-like receptor signaling pathway (04622_2)	MAVS	NFKB1	RELA	FADD	CASP8	CASP10	TRAF6	IKBKB	NFKBIA	NFKBIB	TRADD	MAP3K1	TRAF2	MAP3K7
RIG-I-like receptor signaling pathway (04622_3)	DDX58	IFIH1	MAVS	NFKB1	RELA	TRAF3	TRAF6	ATG5	ATG12	NLRX1	TMEM173	TRADD	MAP3K1	MAPK8	MAPK9	MAPK10	MAPK14	MAPK11	MAPK13	MAPK12	TRAF2	MAP3K7
RIG-I-like receptor signaling pathway (04622_6)	IRF3	IKBKE	IRF7	TANK	AZI2	TBKBP1	TBK1	PIN1	IKBKG	SIKE1	DDX3X
RIG-I-like receptor signaling pathway (04622_8)	MAVS	OTUD5	TRAF3	IRF3	IRF7	TANK	AZI2	TBKBP1	FADD	IKBKG	TRADD	RIPK1
Cytosolic DNA-sensing pathway (04623_3)	ZBP1	TBK1	IKBKE	IRF3	IRF7	MAVS	TMEM173	DDX58	NFKB1	RELA	CGAS
Cytosolic DNA-sensing pathway (04623_4)	ZBP1	NFKB1	RELA	RIPK1	CHUK	IKBKB	IKBKG	NFKBIA	NFKBIB
Cytosolic DNA-sensing pathway (04623_5)	ZBP1	TBK1	IKBKE	IRF3	IRF7	TMEM173	RIPK1	RIPK3	CHUK	IKBKB	IKBKG
C-type lectin receptor signaling pathway (04625_4)	CLEC4M	CD209	LSP1	KSR1	PLK3	SRC	RAF1	PAK1	RRAS2	MRAS	HRAS	KRAS	NRAS	RRAS	ARHGEF12	RHOA	RELA
C-type lectin receptor signaling pathway (04625_6)	IL23A	BCL3	NFKB1	IL10	IL6	IL12A	IL12B	CCL22	CCL17
C-type lectin receptor signaling pathway (04625_10)	NLRP3	CASP1	PYCARD	PRKCD	MAPK1	MAPK3	CARD9
C-type lectin receptor signaling pathway (04625_11)	CLEC7A	CLEC6A	SYK	PTPN11	LSP1	RRAS2	MRAS	HRAS	KRAS	NRAS	RRAS	PLCG2	MAP3K14	CBLB
C-type lectin receptor signaling pathway (04625_13)	CLEC4M	CD209	LSP1	CYLD	IKBKE	STAT1	BCL3	MAPKAPK2
C-type lectin receptor signaling pathway (04625_14)	STAT2	STAT1	IRF9	IL17D
C-type lectin receptor signaling pathway (04625_21)	CLEC7A	CLEC6A	SYK	PTPN11	LSP1	PLCG2	ITPR1	ITPR2	ITPR3	MAP3K14	CBLB	CHUK
C-type lectin receptor signaling pathway (04625_23)	IL2	NFATC1	NFATC2	NFATC3	NFATC4	IL10	PTGS2	EGR2	EGR3
C-type lectin receptor signaling pathway (04625_26)	FCER1G	SYK	NFKBIA	CBLB	IKBKG	CHUK	IKBKB	CARD9	BCL10	MALT1	MAPK14	MAPK11	MAPK13	MAPK12	MAPK8	MAPK9	MAPK10	MAPK1	MAPK3	JUN
Jak-STAT signaling pathway (04630_1)	MYC	PIK3CA	PIK3CB	PIK3CD	PIK3R1	PIK3R2	PIK3R3	CISH	BCL2	SOCS4	SOCS7	SOCS1	SOCS2	SOCS3	SOCS6	SOCS5	CREBBP	EP300	IRF9	STAT1	STAT2	STAT3	STAT4	STAT5A	STAT5B	STAT6	PIAS3	PIAS4	PIAS1	PIAS2	PTPN6	STAM2	STAM	JAK1	JAK2	JAK3	TYK2	FHL1	IL22RA2	CNTFR	CSF2RA	CSF2RB	CSF3R	IL23R	IFNLR1	EGFR	EPOR	GHR	IFNAR1
Jak-STAT signaling pathway (04630_2)	AKT3	AKT1	AKT2	PIK3CA	PIK3CB	PIK3CD	PIK3R1	PIK3R2	PIK3R3	SOS1	SOS2	CISH	SOCS4	SOCS7	SOCS1	SOCS2	SOCS3	SOCS6	SOCS5	STAT1	STAT2	STAT3	STAT4	STAT5A	STAT5B	STAT6	PTPN6	STAM2	STAM	JAK1	JAK2	JAK3	TYK2	IL22RA2	CNTFR	CSF2RA	CSF2RB	CSF3R	IL23R	IFNLR1	EGFR	EPOR	GHR	IFNAR1	IFNAR2	IFNGR1	IFNGR2	IL2RA	IL2RB
Natural killer cell mediated cytotoxicity (04650_3)	PPP3CA	PPP3CB	PPP3CC	PPP3R1	PPP3R2	FYN	PLCG1	PLCG2	LAT	PRKCA	PRKCB	PRKCG	LCP2	SYK	ZAP70	SH2D1B	SH2D1A	HCST	CD247	FCER1G	TYROBP	CD48	PIK3CA	PIK3CB	PIK3CD	PIK3R1	PIK3R2	PIK3R3	SOS1	SOS2	GRB2	SHC2	SHC4	SHC3	SHC1	CD244
Natural killer cell mediated cytotoxicity (04650_5)	TNFSF10	IFNGR1	IFNGR2	IFNG	CSF2	TNF	IFNA1	IFNA2	IFNA4	IFNA5	IFNA6	IFNA7	IFNA8	IFNA10	IFNA13	IFNA14	IFNA16	IFNA17	IFNA21	IFNB1	FAS	MAPK1	MAPK3	MAP2K1	MAP2K2	IFNAR1	IFNAR2
Natural killer cell mediated cytotoxicity (04650_13)	PLCG1	PLCG2	LAT	LCP2	SYK	ZAP70	LCK	FYN	HCST	CD247	FCER1G	TYROBP	PTPN11	PTPN6	PIK3CA	PIK3CB	PIK3CD	PIK3R1	PIK3R2	PIK3R3	GRB2	SHC2	SHC4	SHC3	SHC1	RAC1	RAC2	RAC3	VAV3	VAV1	VAV2	KLRD1	CD244	NCR3	NCR1	FCGR3A	FCGR3B	NCR2	KLRC2	KLRC3	KIR2DS2	KIR2DS1	KIR2DS3	KIR2DS4	KIR2DS5
Natural killer cell mediated cytotoxicity (04650_16)	LAT	SH3BP2	PLCG1	PLCG2	LCP2	SYK	ZAP70	HCST	ULBP3	ULBP2	ULBP1	MICB	MICA	PIK3CA	PIK3CB	PIK3CD	PIK3R1	PIK3R2	PIK3R3	SOS1	SOS2	GRB2	SHC2	SHC4	SHC3	SHC1	RAC1	RAC2	RAC3	VAV3	VAV1	VAV2	KLRK1
Natural killer cell mediated cytotoxicity (04650_18)	NFATC1	NFATC2	PPP3CA	PPP3CB	PPP3CC	PPP3R1	PPP3R2	IFNG	CSF2	TNF	MAPK1	MAPK3	MAP2K1	MAP2K2
Natural killer cell mediated cytotoxicity (04650_19)	NFATC1	NFATC2	IFNGR1	IFNGR2	IFNG	CSF2	TNF	MAPK1	MAPK3	MAP2K1	MAP2K2	ARAF	RAF1	BRAF	PAK1	IFNAR1	IFNAR2
IL-17 signaling pathway (04657_3)	IKBKB	IL6	NFKBIA	NFKB1	RELA	FOS	FOSB	JUN	JUND	FOSL1
Th1 and Th2 cell differentiation (04658_6)	ZAP70	CD247	LAT	PLCG1	CD4	LCK	HLA-DMA	HLA-DMB	HLA-DOA	HLA-DOB	HLA-DPA1	HLA-DPB1	HLA-DQA1	HLA-DQA2	HLA-DQB1	HLA-DRA	HLA-DRB1	HLA-DRB3	HLA-DRB4	HLA-DRB5
Th1 and Th2 cell differentiation (04658_12)	IFNG	IL5	NFKBIA	NFKBIB	NFKBIE	NFKB1	RELA	NFATC1	NFATC2	NFATC3	PPP3CA	PPP3CB	PPP3CC	PPP3R1	PPP3R2	MAPK1	MAPK3	MAPK14	MAPK11	MAPK13	MAPK12	MAPK8	MAPK9	MAPK10	JUN	FOS	IL4R	STAT6	GATA3	TBX21	IL12RB1	IL12RB2	IL13	IL2RA	IL2RB	IL2RG	IL4	IL2	STAT5A	STAT5B	MAF	NOTCH1	NOTCH2	MAML3	MAML2	MAML1	RBPJL	RBPJ	RUNX3
Th17 cell differentiation (04659_2)	PRKCQ	ZAP70	MAPK1	MAPK3	MAPK14	MAPK11	MAPK13	MAPK12	MAPK8	MAPK9	MAPK10	JUN	LAT	FOS	PLCG1	LCK	CD3E	CD3G	CD3D	CD247
Th17 cell differentiation (04659_12)	NFATC1	NFATC2	NFATC3	IL2RG	IL21R	IL6R	IL6ST	IL23R	IL12RB1	STAT3	MAPK14	MAPK11	MAPK13	MAPK12	MTOR	IL21	IL17A	IL17F	IL22	RORC	RORA	SMAD2	SMAD3	SMAD4	IL6	IL23A	HSP90AA1	HSP90AB1	AHR	HIF1A
Th17 cell differentiation (04659_15)	TBX21	RUNX1	RORC	GATA3
Th17 cell differentiation (04659_16)	RORC	IL17A	IL17F	IL21	IL22	FOXP3	RUNX1
Th17 cell differentiation (04659_18)	IL2RA	IL2RB	IL2RG	STAT5A	STAT5B	RARA	RXRA	RXRB	RXRG	FOXP3	SMAD2	SMAD3	SMAD4	TGFBR1	TGFBR2
T cell receptor signaling pathway (04660_5)	NFKBIA	NFKBIB	NFKBIE	IKBKB	IKBKG	MAP3K14	MALT1	BCL10	CARD11	PRKCQ	RASGRP1	PLCG1	MAP3K7	MAP2K7
T cell receptor signaling pathway (04660_8)	IKBKB	IKBKG	BCL10	CARD11	PRKCQ	SOS1	SOS2	RASGRP1	HRAS	KRAS	NRAS	ITK	TEC	PLCG1	LAT	LCP2	MAP3K7	MAP2K7
T cell receptor signaling pathway (04660_11)	MAP3K8	AKT3	AKT1	AKT2	PDPK1	PIK3CA	PIK3CB	PIK3CD	PIK3R1	PIK3R2	PIK3R3	NFATC1	NFATC2	NFATC3	PPP3CA	PPP3CB	PPP3CC	PPP3R1	PPP3R2	MAPK14	MAPK11	MAPK13	MAPK12	GSK3B
T cell receptor signaling pathway (04660_12)	CARD11	PRKCQ	SOS1	SOS2	RASGRP1	HRAS	KRAS	NRAS	ITK	TEC	PLCG1	GRB2	LAT	GRAP2	VAV3	VAV1	VAV2	NCK1	NCK2	LCP2	ZAP70	MAP3K7
T cell receptor signaling pathway (04660_13)	PRKCQ	RASGRP1	ITK	TEC	PLCG1	LAT	GRAP2	VAV3	VAV1	VAV2	RHOA	CDC42	PAK4	PAK1	PAK2	PAK3	PAK6	PAK5	NCK1	NCK2	LCP2	ZAP70	CD247	FYN	CBLB	LCK	PTPN6	DLG1	MAPK14	MAPK11	MAPK13	MAPK12
T cell receptor signaling pathway (04660_14)	NFATC1	NFATC2	NFATC3	PPP3CA	PPP3CB	PPP3CC	PPP3R1	PPP3R2	LAT	LCP2	ZAP70	CD247	FYN	CBLB	LCK	PTPN6	DLG1	MAPK14	MAPK11	MAPK13	MAPK12	GSK3B
T cell receptor signaling pathway (04660_15)	NFATC1	NFATC2	NFATC3	ITK	TEC	PLCG1	GRB2	LAT	GRAP2	VAV3	VAV1	VAV2	NCK1	NCK2	LCP2	ZAP70	CD247	FYN	CD3E	CD4	CD8A	CD8B	CBLB	LCK	PTPRC	PTPN6	CTLA4	PDCD1	DLG1	MAPK14	MAPK11	MAPK13	MAPK12
B cell receptor signaling pathway (04662_2)	NFKBIA	NFKBIB	NFKBIE	IKBKB	IKBKG	CHUK	GSK3B	MALT1	BCL10	CARD11	AKT3	AKT1	AKT2	PIK3CA	PIK3CB	PIK3CD	PIK3R1	PIK3R2	PIK3R3	CD19	PIK3AP1
B cell receptor signaling pathway (04662_7)	CARD11	PRKCB	FOS	JUN	HRAS	KRAS	NRAS	RASGRP3	PLCG2	BLNK	BTK	SYK	RAF1	SOS1	SOS2	GRB2
B cell receptor signaling pathway (04662_14)	PRKCB	PIK3CA	PIK3CB	PIK3CD	PIK3R1	PIK3R2	PIK3R3	CD19	RASGRP3	VAV3	VAV1	VAV2	PLCG2	BLNK	BTK	LYN	CD79B	CD79A	NA	SYK	PTPN6	CD72	CD22	LILRB3	GRB2	PIK3AP1	DAPP1
Fc epsilon RI signaling pathway (04664_4)	AKT3	AKT1	AKT2	MAP2K7	MAP2K4	MAP2K3	MAP2K6	PDPK1	PIK3CA	PIK3CB	PIK3CD	PIK3R1	PIK3R2	PIK3R3	PRKCA	GAB2	LCP2	BTK	SYK	LYN	LAT	PLCG1	PLCG2	FCER1G	RAC1	RAC2	RAC3	VAV3	VAV1	VAV2
Fc epsilon RI signaling pathway (04664_5)	MAPK14	MAPK11	MAPK13	MAPK12	MAP2K7	MAP2K4	MAP2K3	MAP2K6	PDPK1	PIK3CA	PIK3CB	PIK3CD	PIK3R1	PIK3R2	PIK3R3	LCP2	BTK	SYK	PLCG1	PLCG2	MAPK8	MAPK9	MAPK10	RAC1	RAC2	RAC3	VAV3	VAV1	VAV2
Fc gamma R-mediated phagocytosis (04666_4)	FCGR3A	FCGR2A	FCGR1A	SYK	PIK3CA	PIK3CB	PIK3CD	PIK3R1	PIK3R2	PIK3R3	LAT	PLCG1	PLCG2	PRKCD	PRKCE	RAF1	AKT3	AKT1	AKT2	RPS6KB1	RPS6KB2	VAV3	VAV1	VAV2	RAC1	RAC2	WAS	WASL	PLD1	PLD2	PLA2G6	MARCKS	MARCKSL1	MYO10	GSN	SCIN	PIP5K1C	PIP5K1A	PIP5K1B	PLPP1	PLPP2	PLPP3	GAB2	ARF6	DNM2	AMPH	BIN1	SPHK2	SPHK1
Fc gamma R-mediated phagocytosis (04666_10)	SYK	PIK3CA	PIK3CB	PIK3CD	PIK3R1	PIK3R2	PIK3R3	PLCG1	PLCG2	PRKCD	PRKCE	AKT3	AKT1	AKT2	VAV3	VAV1	VAV2	RAC1	RAC2	WASF2	WASF3	WASF1	ARPC5	ARPC4	ARPC3	ARPC1B	ARPC2	ARPC1A	ARPC5L	CDC42	WAS	WASL	DOCK2	CRK	CRKL	PLD1	PLD2	PAK1	MYO10	GSN	SCIN	PIP5K1C	PIP5K1A	PIP5K1B	PLPP1	PLPP2	PLPP3	ARF6	SPHK2
TNF signaling pathway (04668_4)	TRAF2	TRAF5	BIRC2	BIRC3	MAP3K7	MAP2K7	MAP2K4	MAP2K3	MAP2K6	MAPK14	MAPK11	MAPK13	MAPK12	MAPK8	MAPK9	MAPK10	IKBKB	NFKBIA	MAP3K8	MAP3K5	MAP3K14
TNF signaling pathway (04668_11)	MAP3K7	MAP2K3	MAP2K6	MAPK14	MAPK11	MAPK13	MAPK12	MAP2K1	MAPK1	MAPK3	RPS6KA4	RPS6KA5	CREB3	CREB1	ATF2	ATF6B	CREB3L4	ATF4	CREB3L2	CREB3L3	CREB3L1	CREB5	CEBPB
TNF signaling pathway (04668_15)	LTA	TNF	TNFRSF1B	TRAF2	BIRC2	BIRC3	PIK3CA	PIK3CB	PIK3CD	PIK3R1	PIK3R2	PIK3R3	AKT3	AKT1	AKT2	MAP3K14	CHUK	IKBKB	IKBKG	DAB2IP	RIPK1
TNF signaling pathway (04668_19)	LTA	TNF	TNFRSF1B	TRAF2	MAPK8	MAPK9	MAPK10	JUN	DAB2IP
Leukocyte transendothelial migration (04670_2)	MMP2	MMP9	PIK3CA	PIK3CB	PIK3CD	PIK3R1	PIK3R2	PIK3R3	MAPK14	MAPK11	MAPK13	MAPK12	CYBB	CYBA	NCF2	NCF1	RAC1	NCF4	RAP1A	RAP1B	ITGB1	RASSF5	VCAM1	ITGA4	MSN	EZR	ACTB	ACTG1
Leukocyte transendothelial migration (04670_7)	BCAR1	AFDN	SIPA1	MYL12B	MYL9	MYL12A	MYLPF	MYL2	MYL5	MYL7	MYL10	ROCK1	ROCK2	PRKCA	PRKCB	PRKCG	PTK2	RHOA	ARHGAP35	ARHGAP5	PXN	ITGAL	MSN	EZR	ITGB2	THY1	ICAM1	PLCG1	PLCG2	RAP1A	RAP1B
Leukocyte transendothelial migration (04670_16)	BCAR1	ROCK1	ROCK2	PRKCA	PRKCB	PRKCG	PTK2	RHOA	ARHGAP35	ARHGAP5	PXN	RAP1A	RAP1B	VAV3	VAV1	VAV2	ITGAL	MSN	EZR	ITGB2	RASSF5	PTK2B	ICAM1	PLCG1	PLCG2	ACTB	ACTG1	RAP1A	RAP1B
Leukocyte transendothelial migration (04670_20)	RAP1A	RAP1B	ITGAM	ITGAL	ITGB1	ITGB2	RAPGEF3	RAPGEF4	RASSF5	PTK2B	CXCR4	GNAI1	GNAI2	GNAI3	ITGA4	PIK3CA	PIK3CB	PIK3CD	PIK3R1	PIK3R2	PIK3R3	VAV3	VAV1	VAV2
Intestinal immune network for IgA production (04672_1)	TNFSF13	TNFSF13B	TNFRSF13C	TNFRSF13B	TNFRSF17
Circadian rhythm (04710_1)	ARNTL	NPAS2	CLOCK	RORA	RORB	RORC	NR1D1	PER1	PER3	PER2	CRY1	CRY2	CSNK1D	CSNK1E	SKP1	CUL1	RBX1	FBXW11	BTRC	FBXL3	PRKAG2	PRKAG3	PRKAA1	PRKAA2	PRKAB1	PRKAB2	PRKAG1	CREB1	BHLHE41	BHLHE40
Circadian entrainment (04713_9)	GRIN1	GRIN2A	GRIN2B	GRIN2C	GRIN2D	CALML6	CALML5	CALM1	CALM2	CALM3	CALML3	CALML4	CAMK2A	CAMK2B	CAMK2D	CAMK2G	NOS1	CACNA1I	CACNA1H	CACNA1G	ITPR1	ITPR3	RYR1	RYR2	RYR3	MAPK1	MAPK3	PRKACA	PRKACB	PRKACG	RASD1	NOS1AP	GNB5	GNAI1	GNAI2	GNAI3	GNAO1	GNB1	GNB2	GNB3	GNG3	GNG4	GNG5	GNG7	GNG10	GNG11	GNGT1	GNGT2	GNG13
Thermogenesis (04714_1)	CREB3	CREB1	CREB3L4	CREB3L2	CREB3L3	CREB3L1	CREB5	PRKACA	PRKACB	PRKACG	MAPK14	MAPK11	MAPK13	MAPK12	ATF2	FGF21	UCP1	PPARGC1A	PPARG	PRKG1	PRKG2	KDM3B	KDM3A	ACTL6B	ARID1B	ACTB	SMARCA2	SMARCA4	SMARCB1	SMARCC1	SMARCC2	SMARCD1	SMARCD2	SMARCD3	SMARCE1	ACTG1	DPF3	DPF1	ARID1A	ACTL6A	LIPE	PLIN1	ZNF516	RPS6	MAP2K3	MAP3K5
Thermogenesis (04714_2)	CREB3	CREB1	CREB3L4	CREB3L2	CREB3L3	CREB3L1	CREB5	PRKACA	PRKACB	PRKACG	GNAS	ADRB3	ADCY1	ADCY2	ADCY3	ADCY5	ADCY6	ADCY7	ADCY8	ADCY9	ADCY4	ADCY10	KDM3B	KDM3A	LIPE	PLIN1	CNR1	MAP3K5
Thermogenesis (04714_6)	FGF21	FGFR1	KLB	FRS2	GRB2	SOS1	SOS2
Thermogenesis (04714_7)	RPS6KA6	RPS6KA1	RPS6KA2	RPS6KA3	TSC1	TSC2	RHEB	MTOR	MLST8	RPTOR	AKT1S1	RPS6KB1	RPS6KB2
Thermogenesis (04714_8)	RPS6KA6	RPS6KA1	RPS6KA2	RPS6KA3	TSC1	TSC2	RHEB	MTOR	MLST8	RPTOR	HRAS	KRAS	NRAS
Long-term potentiation (04720_4)	CAMK4	CAMK2A	CAMK2B	CAMK2D	CAMK2G	PPP3CA	PPP3CB	PPP3CC	PPP3R1	PPP3R2	CALML6	CALML5	CALM1	CALM2	CALM3	CALML3	CALML4	RPS6KA6	RPS6KA1	RPS6KA2	RPS6KA3	ATF4	GRIN1	GRIN2A	GRIN2B	GRIN2C	GRIN2D	PRKACA	PRKACB	PRKACG	CACNA1C	PPP1CA	PPP1CB	PPP1CC	ADCY1	ADCY8	GRIA1	GRIA2	RAPGEF3	MAPK1	MAPK3	MAP2K1	MAP2K2	ARAF	RAF1	BRAF	HRAS	KRAS	NRAS
Synaptic vesicle cycle (04721_1)	STX1B	STX2	STX1A	STX3	VAMP2	SNAP25	STXBP1
Neurotrophin signaling pathway (04722_5)	NTRK1	NTRK2	NTRK3	BDNF	NTF4	NTF3	PIK3CA	PIK3CB	PIK3CD	PIK3R1	PIK3R2	PIK3R3	SHC2	SHC4	SHC3	SHC1	GRB2	NGF	NGFR	AKT3	AKT1	AKT2	HRAS	KRAS	NRAS	RAF1	BRAF	SOS1	SOS2	MAPK1	MAPK3	RPS6KA6	RPS6KA1	RPS6KA2	RPS6KA3	PTPN11	GAB1	BAD	GSK3B	FOXO3	NFKBIA	NFKBIB	NFKBIE	PDPK1	SORT1	RHOA	IRS1	MAPK14	MAPK11
Neurotrophin signaling pathway (04722_9)	NTRK1	PLCG1	PLCG2	PRKCD	MAP2K1	MAP2K2	CRK	CRKL	RAPGEF1	RAP1A	RAP1B	BRAF	FRS2	KIDINS220
Neurotrophin signaling pathway (04722_10)	NTRK1	NTRK2	NTRK3	NTF3	PIK3CA	PIK3CB	PIK3CD	PIK3R1	PIK3R2	PIK3R3	PLCG1	PLCG2	SHC2	SHC4	SHC3	SHC1	GRB2	PRKCD	NGF	NGFR	MAP2K1	MAP2K2	SOS1	SOS2	CRK	CRKL	PTPN11	GAB1	FRS2	KIDINS220	MATK	IRS1	SH2B2	SH2B3	SH2B1	ABL1	CALML6	CALML5	CALM1	CALM2	CALM3	CALML3	CALML4
Retrograde endocannabinoid signaling (04723_3)	CNR1	CACNA1A	CACNA1B	GNB5	GNAI1	GNAI2	GNAI3	GNAO1	GNB1	GNB2	GNB3	GNG3	GNG4	GNG5	GNG7	GNG10	GNG11	GNGT1	GNGT2	GNG13	GNG2	GNG12	GNB4	GNG8	KCNJ3	KCNJ5	KCNJ6	KCNJ9	ADCY1	ADCY2	ADCY3	ADCY5	ADCY6	ADCY7	ADCY8	ADCY9	ADCY4	PRKACA	PRKACB	PRKACG	MAPK14	MAPK1	MAPK3	MAPK8	MAPK11	MAPK9	MAPK10	MAPK13	MAPK12
Retrograde endocannabinoid signaling (04723_4)	NDUFA11	NDUFS7	ND1	ND2	ND3	ND4	ND4L	ND5	ND6	NDUFA1	NDUFA2	NDUFA3	NDUFA4	NDUFA5	NDUFA6	NDUFA7	NDUFA8	NDUFA9	NDUFA10	NDUFAB1	NDUFB1	NDUFB2	NDUFB3	NDUFB4	NDUFB5	NDUFB6	NDUFB7	NDUFB8	NDUFB9	NDUFB10	NDUFC1	NDUFC2	NDUFS1	NDUFS2	NDUFS3	NDUFV1	NDUFS4	NDUFS5	NDUFS6	NDUFS8	NDUFV2	NDUFV3	NDUFA13	NDUFB11	NDUFA12	NDUFA4L2	GNB5	GNAI1	GNAI2
Glutamatergic synapse (04724_4)	GRM6	GRM7	GRM8	GRIK1	GRIK2	GRIK3	GRIK4	GRIK5	GRIA1	GRIA2	GRIA3	GRIA4	GRIN3A	GRIN3B	GRIN1	GRIN2A	GRIN2B	GRIN2C	GRIN2D	GRM1	GRM5	GRM2	GRM3	GRM4	GNAS	ADCY1	ADCY2	ADCY3	ADCY5	ADCY6	ADCY7	ADCY8	ADCY9	ADCY4	GNAQ	PLCB1	PLCB2	PLCB3	PLCB4	TRPC1	GNB5	GNAI1	GNAI2	GNAI3	GNAO1	GNB1	GNB2	GNB3	GNG3
Glutamatergic synapse (04724_6)	GRM1	GRM5	GNAQ	PLCB1	PLCB2	PLCB3	PLCB4	ITPR1	ITPR2	ITPR3	PRKCA	PRKCB	PRKCG	PLA2G4B	PLA2G4E	PLA2G4F	PLA2G4D	PLA2G4A	PLA2G4C	JMJD7-PLA2G4B	PLD1	PLD2	MAPK1	MAPK3	HOMER3	HOMER2	HOMER1
Cholinergic synapse (04725_1)	CHRNA3	CHRNA4	CHRNA7	CHRNB2	CHRNB4	CHRNA6	CHRM1	CHRM2	CHRM4	GNA11	GNAQ	PLCB1	PLCB2	PLCB3	PLCB4	ITPR1	ITPR2	ITPR3	PRKCA	PRKCB	PRKCG	CHRM5	CHRM3
Cholinergic synapse (04725_6)	ADCY1	ADCY2	ADCY3	ADCY5	ADCY6	ADCY7	ADCY8	ADCY9	ADCY4	PRKACA	PRKACB	PRKACG	GNB5	GNAI1	GNAI2	GNAI3	GNAO1	GNB1	GNB2	GNB3	GNG3	GNG4	GNG5	GNG7	GNG10	GNG11	GNGT1	GNGT2	GNG13	GNG2	GNG12	GNB4	GNG8	MAPK1	MAPK3	CREB3	CREB1	CREB3L4	ATF4	CREB3L2	CREB3L3	CREB3L1	CREB5	CAMK4	CAMK2A	CAMK2B	CAMK2D	CAMK2G	PIK3CA
Cholinergic synapse (04725_7)	CHRNA3	CHRNA4	CHRNA7	CHRNB2	CHRNB4	CHRNA6	PRKACA	PRKACB	PRKACG	CAMK4	CAMK2A	CAMK2B	CAMK2D	CAMK2G	PIK3CA	PIK3CB	PIK3CD	PIK3R1	PIK3R2	PIK3R3	AKT3	AKT1	AKT2	BCL2	JAK2	FYN
Cholinergic synapse (04725_8)	CHRNA3	CHRNA4	CHRNA7	CHRNB2	CHRNB4	CHRNA6	CHRM1	CHRM2	CHRM4	ADCY1	ADCY2	ADCY3	ADCY5	ADCY6	ADCY7	ADCY8	ADCY9	ADCY4	PRKACA	PRKACB	PRKACG	GNB5	GNAI1	GNAI2	GNAI3	GNAO1	GNB1	GNB2	GNB3	GNG3	GNG4	GNG5	GNG7	GNG10	GNG11	GNGT1	GNGT2	GNG13	GNG2	GNG12	GNB4	GNG8	CHRM5	CHRM3	PIK3CA	PIK3CB	PIK3CD	PIK3R1	PIK3R2
Serotonergic synapse (04726_5)	HTR4	HTR6	HTR7	GNAS	GNAQ	PLCB1	PLCB2	PLCB3	PLCB4	HTR1A	HTR1B	HTR1D	HTR1E	HTR1F	GNB5	GNAI1	GNAI2	GNAI3	GNAO1	GNB1	GNB2	GNB3	GNG3	GNG4	GNG5	GNG7	GNG10	GNG11	GNGT1	GNGT2	GNG13	GNG2	GNG12	GNB4	GNG8	HTR5A	HTR2A	HTR2B	HTR2C	PLA2G4B	PLA2G4E	PLA2G4F	PLA2G4D	PLA2G4A	PLA2G4C	JMJD7-PLA2G4B	CACNA1C	CACNA1D	CACNA1F
GABAergic synapse (04727_1)	GABBR1	GABBR2	ADCY1	ADCY2	ADCY3	ADCY5	ADCY6	ADCY7	ADCY8	ADCY9	ADCY4	GNB5	GNAI1	GNAI2	GNAI3	GNAO1	GNB1	GNB2	GNB3	GNG3	GNG4	GNG5	GNG7	GNG10	GNG11	GNGT1	GNGT2	GNG13	GNG2	GNG12	GNB4	GNG8	GABRA1	GABRA2	GABRA3	GABRA4	GABRA5	GABRA6	GABRB1	GABRB2	GABRB3	GABRD	GABRE	GABRG1	GABRG2	GABRG3	GABRP	GABRQ	KCNJ6
Dopaminergic synapse (04728_2)	DRD5	GNAL	GNAS	ADCY5	PRKACA	PRKACB	PRKACG	GNAQ	PLCB1	PLCB2	PLCB3	PLCB4	ITPR1	ITPR2	ITPR3	PRKCA	PRKCB	PRKCG	DRD2	GNB5	GNAI1	GNAI2	GNAI3	GNAO1	GNB1	GNB2	GNB3	GNG3	GNG4	GNG5	GNG7	GNG10	GNG11	GNGT1	GNGT2	GNG13	GNG2	GNG12	GNB4	GNG8	DRD1	DRD3	DRD4	ARRB2	PPP2R3B	PPP2R3C	PPP2CA	PPP2CB	PPP2R1A
Dopaminergic synapse (04728_3)	DRD5	GNAL	GNAS	ADCY5	PRKACA	PRKACB	PRKACG	PLCB1	PLCB2	PLCB3	PLCB4	PRKCA	PRKCB	PRKCG	DRD2	GNB5	GNAI1	GNAI2	GNAI3	GNAO1	GNB1	GNB2	GNB3	GNG3	GNG4	GNG5	GNG7	GNG10	GNG11	GNGT1	GNGT2	GNG13	GNG2	GNG12	GNB4	GNG8	CREB3	CREB1	ATF2	ATF6B	CREB3L4	ATF4	CREB3L2	CREB3L3	CREB3L1	CREB5	PPP1R1B	MAPK14	MAPK8
Long-term depression (04730_2)	PLCB1	PLCB2	PLCB3	PLCB4	GNA11	GNAQ	RYR1	PLA2G4B	PLA2G4E	PLA2G4F	PLA2G4D	PLA2G4A	PLA2G4C	JMJD7-PLA2G4B	GNA13	GNA12	GNAI1	GNAI2	GNAI3	GNAO1	GNAS	GNAZ	PRKCA	PRKCB	PRKCG	CACNA1A	PPP1R17	GRIA1	GRIA2	GRIA3	MAPK1	MAPK3	MAP2K1	MAP2K2	PPP2CA	PPP2CB	PPP2R1A	PPP2R1B	LYN	ITPR1	ITPR2	ITPR3
Long-term depression (04730_5)	NOS1	GUCY1A2	GUCY1A1	GUCY1B1	PRKG1	PRKG2	PPP1R17	MAPK1	MAPK3	MAP2K1	MAP2K2	ARAF	RAF1	BRAF	HRAS	KRAS	NRAS	PPP2CA	PPP2CB	PPP2R1A	PPP2R1B
Olfactory transduction (04740_4)	CAMK2A	CAMK2B	CAMK2D	CAMK2G	GNAL	GNB1	GNG7	GNG13	CALML6	CALML5	CALM1	CALM2	CALM3	CALML3	CALML4	PRKACA	PRKACB	PRKACG	ADCY3	OR5I1	OR52E2	OR52J3	OR51L1	OR51A7	OR51S1	OR51F2	OR52R1	OR4C46	OR4X2	OR4B1	OR52M1	OR52K2	OR5P2	OR5P3	OR8I2	OR2D3	OR2D2	OR52W1	OR56A4	OR56A1	OR10P1	OR10AD1	OR10A7	OR4K14	OR4L1	OR11H6	OR4D2	OR7D4	OR7G1
Olfactory transduction (04740_5)	GUCY2D	CNGA3	PRKG1	PRKG2	PDE2A
Taste transduction (04742_1)	TRPM5	TAS1R2	PLCB2	ITPR3	PDE1A	PDE1C	PDE1B	TAS1R1	TAS1R3	GNB3	GNAT3	GNG13	GNB3	GNAT3	GNG13
Taste transduction (04742_6)	P2RY4	P2RX2	P2RY1	P2RX3
Phototransduction (04744_2)	RHO	GNAT1	GNAT2	GNB1	GNGT1	PDE6A	PDE6G	PDE6B	GRK7	GRK1	SAG	RGS9
Inflammatory mediator regulation of TRP channels (04750_1)	P2RY2	BDKRB1	BDKRB2	HTR2A	HTR2B	HTR2C	HRH1	TRPV1	GNAQ	PLA2G4B	PLA2G4E	PLA2G4F	PLA2G4D	PLA2G4A	PLA2G6	PLA2G4C	JMJD7-PLA2G4B	PLCB1	PLCB2	PLCB3	PLCB4	PRKCE	ITPR1	ITPR2	ITPR3	TRPA1	PPP1CA	PPP1CB	PPP1CC
Inflammatory mediator regulation of TRP channels (04750_5)	TRPV1	NTRK1	NGF	PLCG1	PLCG2	PIK3CA	PIK3CB	PIK3CD	PIK3R1	PIK3R2	PIK3R3	PRKCE	PRKCD	SRC
Inflammatory mediator regulation of TRP channels (04750_9)	TRPV1	ASIC2	ASIC1	ASIC5	ASIC4	ASIC3	GNAS	ADCY1	ADCY2	ADCY3	ADCY5	ADCY6	ADCY7	ADCY8	ADCY9	ADCY4	PRKCE	PRKACA	PRKACB	PRKACG	CAMK2A	CAMK2B	CAMK2D	CAMK2G	MAPK14	MAPK8	MAPK11	MAPK9	MAPK10	MAPK13	MAPK12	TRPA1	TRPV4	TRPM8	PPP1CA	PPP1CB	PPP1CC	PLA2G4B	PLA2G4E	PLA2G4F	PLA2G4D	PLA2G4A	PLA2G6	PLA2G4C	JMJD7-PLA2G4B	PRKCA	PRKCB	PRKCD	PRKCG
Regulation of actin cytoskeleton (04810_3)	WASF2	WASF1	BRK1	APC2	APC	SPATA13	ARHGEF4	ABI2	NCKAP1	NCKAP1L	CYFIP1	CYFIP2	BAIAP2	LIMK1	LIMK2	DIAPH1	DIAPH2	MYLK4	MYLK	MYLK2	MYLK3	GIT1	ROCK1	ROCK2	PAK4	PAK1	PAK2	PAK3	PAK6	PAK5	ARHGEF7	ARHGEF6	CDC42	RAC1	RAC2	RAC3	RHOA	ARHGEF12	ARHGEF1	IQGAP2	IQGAP3	IQGAP1	ARHGAP35	VAV3	TIAM1	VAV1	VAV2	PIK3CA	PIK3CB
Regulation of actin cytoskeleton (04810_6)	SPATA13	ARHGEF4	ABI2	NCKAP1	NCKAP1L	CYFIP1	CYFIP2	BAIAP2	LIMK1	LIMK2	PFN3	PFN4	PFN1	PFN2	DIAPH1	DIAPH2	PIKFYVE	PIP5K1C	PIP4K2A	PIP4K2C	PIP5K1A	PIP5K1B	PIP4K2B	SLC9A1	PPP1R12A	PPP1R12B	PPP1R12C	PPP1CA	PPP1CB	PPP1CC	MYL12B	MYL9	MYL12A	MYLPF	MYL2	MYL5	MYL7	MYL10	MYLK4	MYLK	MYLK2	MYLK3	ROCK1	ROCK2	PAK4	PAK1	PAK2	PAK3	PAK6
Regulation of actin cytoskeleton (04810_13)	ARPC5	ARPC4	ARPC3	ARPC1B	ARPC2	ARPC1A	ARPC5L	WASF2	WASF1	BRK1	WAS	WASL	ABI2	NCKAP1	NCKAP1L	CYFIP1	CYFIP2	BAIAP2	CFL1	CFL2	LIMK1	LIMK2	MYLK4	MYLK	MYLK2	MYLK3	ROCK1	ROCK2	PAK4	PAK1	PAK2	PAK3	PAK6	PAK5	ARHGEF7	ARHGEF6	CDC42	RAC1	RAC2	RAC3	IQGAP2	IQGAP3	IQGAP1	GNG12	ACTB	ACTG1
Regulation of actin cytoskeleton (04810_17)	WAS	WASL	SPATA13	ARHGEF4	ABI2	NCKAP1	NCKAP1L	CYFIP1	CYFIP2	BAIAP2	CFL1	CFL2	LIMK1	LIMK2	MYL12B	MYL9	MYL12A	MYLPF	MYL2	MYL5	MYL7	MYL10	MYLK4	MYLK	MYLK2	MYLK3	GIT1	DIAPH3	ROCK1	ROCK2	PAK4	PAK1	PAK2	PAK3	PAK6	PAK5	ARHGEF7	ARHGEF6	CDC42	RAC1	RAC2	RAC3	RHOA	ARHGEF12	ARHGEF1	IQGAP2	IQGAP3	IQGAP1	VAV3
Regulation of actin cytoskeleton (04810_18)	SPATA13	ARHGEF4	ABI2	NCKAP1	NCKAP1L	CYFIP1	CYFIP2	BAIAP2	DIAPH1	DIAPH2	ROCK1	ROCK2	PAK4	PAK1	PAK2	PAK3	PAK6	PAK5	ARHGEF7	ARHGEF6	RAC1	RAC2	RAC3	RHOA	ARHGEF12	ARHGEF1	IQGAP2	IQGAP3	IQGAP1	ARHGAP35	VAV3	TIAM1	VAV1	VAV2	DOCK1	CRK	CRKL	BCAR1	PTK2	SRC	ITGA11	ITGA6	ITGA1	ITGA2	ITGA2B	ITGA3	ITGA4	ITGA5	ITGA7
Regulation of actin cytoskeleton (04810_21)	RAC1	RAC2	RAC3	VAV3	TIAM1	VAV1	VAV2	MAP2K1	MAP2K2	ARAF	MOS	RAF1	BRAF	PIK3CA	PIK3CB	PIK3CD	PIK3R1	PIK3R2	PIK3R3	ARHGEF6	RRAS2	MRAS	HRAS	KRAS	NRAS	RRAS	SOS1	SOS2	EGFR	FGFR1	FGFR3	FGFR2	FGFR4	INSRR	PDGFRA	PDGFRB
Insulin signaling pathway (04910_1)	TSC1	INPP5K	INPPL1	PPP1CA	PPP1CB	PPP1CC	PPP1R3A	PPP1R3C	PPP1R3D	PPP1R3B	PPP1R3F	EIF4EBP1	RPS6	FOXO1	EIF4E	EIF4E1B	EIF4E2	RPS6KB1	RPS6KB2	BAD	TSC2	MTOR	PDE3B	RHEB	AKT3	AKT1	AKT2	PIK3CA	PIK3CB	PIK3CD	PIK3R1	PIK3R2	PIK3R3	GSK3B	SREBF1	PRKCI	PRKCZ	SLC2A4	PDPK1	IRS1	IRS4	IRS2
Insulin signaling pathway (04910_2)	INPP5K	INPPL1	IKBKB	MAPK8	MAPK9	MAPK10	PTPRF	PTPN1	SOCS4	SOCS1	SOCS2	SOCS3	INS	SOS1	SOS2	SHC2	SHC4	SHC3	SHC1	INSR	GRB2	MTOR	PIK3CA	PIK3CB	PIK3CD	PIK3R1	PIK3R2	PIK3R3	PRKCI	PRKCZ	SH2B2	PDPK1	CBL	CBLB	IRS1	IRS4	IRS2
Insulin signaling pathway (04910_4)	INPP5K	INPPL1	FASN	PRKAG2	PRKAG3	PRKAA1	PRKAA2	PRKAB1	PRKAB2	PRKAG1	PKLR	ACACA	ACACB	MTOR	PIK3CA	PIK3CB	PIK3CD	PIK3R1	PIK3R2	PIK3R3	SREBF1	GCK	HK1	HK2	HK3	HKDC1	PRKCI	PRKCZ	SLC2A4	PDPK1
Insulin signaling pathway (04910_7)	INPP5K	INPPL1	PPP1CA	PPP1CB	PPP1CC	PPP1R3A	PPP1R3C	PPP1R3D	PPP1R3B	PPP1R3F	GYS1	GYS2	CALML6	CALML5	PHKA1	PHKA2	PHKB	PHKG1	PHKG2	CALM1	CALM2	CALM3	CALML3	CALML4	PRKACA	PRKACB	PRKACG	PRKAR1A	PRKAR1B	PRKAR2A	PRKAR2B	EIF4EBP1	FOXO1	TRIP10	RPS6KB1	RPS6KB2	BAD	TSC2	PCK1	PCK2	G6PC	G6PC2	G6PC3	MTOR	PDE3B	FBP1	FBP2	EXOC7	PPARGC1A
Insulin signaling pathway (04910_11)	TRIP10	INSR	EXOC7	AKT3	AKT1	AKT2	RHOQ	RAPGEF1	CRK	CRKL	PRKCI	PRKCZ	SLC2A4
Insulin secretion (04911_4)	CHRM3	PLCB1	PLCB2	PLCB3	PLCB4	ADCY1	ADCY2	ADCY3	ADCY5	ADCY6	ADCY7	ADCY8	ADCY9	ADCY4	PRKACA	PRKACB	PRKACG	GNAS	GNA11	GNAQ	PRKCA	PRKCB	PRKCG	FFAR1	CCKAR	ADCYAP1	ADCYAP1R1	ITPR3
Insulin secretion (04911_6)	CACNA1C	CACNA1D	CACNA1F	CACNA1S	GLP1R	PLCB1	PLCB2	PLCB3	PLCB4	ADCY1	ADCY2	ADCY3	ADCY5	ADCY6	ADCY7	ADCY8	ADCY9	ADCY4	PRKACA	PRKACB	PRKACG	GNAS	RYR2	CREB3	CREB1	ATF2	ATF6B	CREB3L4	ATF4	CREB3L2	CREB3L3	CREB3L1	CREB5	RAPGEF4	ABCC8	RIMS2	GPR119	ADCYAP1R1	ITPR3	PDX1	PCLO
GnRH signaling pathway (04912_1)	PRKCA	PRKCB	PRKCD	PLCB1	PLCB2	PLCB3	PLCB4	CDC42	MAP2K3	MAP2K6	MAP3K2	MAP3K1	MAP3K3	MAP3K4	MAPK7	PLA2G4B	PLA2G4E	PLA2G4F	PLA2G4D	PLA2G4A	PLA2G4C	JMJD7-PLA2G4B	ITPR1	ITPR2	ITPR3	GNA11	GNAQ	MMP14	PLD1	PLD2	SRC	MMP2	MAP2K1	MAP2K2	RAF1	HRAS	KRAS	NRAS	EGFR	PTK2B
GnRH signaling pathway (04912_7)	PRKCA	PRKCB	PRKCD	PLCB1	PLCB2	PLCB3	PLCB4	MAP3K2	MAP3K1	MAP3K3	MAP3K4	MAPK7	PLA2G4B	PLA2G4E	PLA2G4F	PLA2G4D	PLA2G4A	PLA2G4C	JMJD7-PLA2G4B	ITPR1	ITPR2	ITPR3	CALML6	CALML5	CALM1	CALM2	CALM3	CALML3	CALML4	GNA11	GNAQ	MMP14	GNRHR	PLD1	PLD2	SRC	RAF1	PTK2B
Ovarian steroidogenesis (04913_1)	HSD3B1	HSD3B2	LHCGR	STAR	CYP17A1	GNAS	ADCY1	ADCY2	ADCY3	ADCY5	ADCY6	ADCY7	ADCY8	ADCY9	ADCY4	PRKACA	PRKACB	PRKACG	ACOT2	PLA2G4B	PLA2G4E	PLA2G4F	PLA2G4D	PLA2G4A	PLA2G4C	JMJD7-PLA2G4B
Ovarian steroidogenesis (04913_4)	FSHR	GNAS	ADCY1	ADCY2	ADCY3	ADCY5	ADCY6	ADCY7	ADCY8	ADCY9	ADCY4	HSD17B2	AKR1C3	CYP19A1	HSD17B1	HSD17B7	PRKACA	PRKACB	PRKACG
Estrogen signaling pathway (04915_2)	GPER1	SRC	MMP2	MMP9	HBEGF	GNAS	ADCY1	ADCY2	ADCY3	ADCY5	ADCY6	ADCY7	ADCY8	ADCY9	ADCY4
Estrogen signaling pathway (04915_5)	ESR1	ESR2	PRKACA	PRKACB	PRKACG	HRAS	KRAS	NRAS	RAF1	MAP2K1	MAP2K2	MAPK1	MAPK3	CREB3	CREB1	ATF2	ATF6B	CREB3L4	ATF4	CREB3L2	CREB3L3	CREB3L1	CREB5
Estrogen signaling pathway (04915_12)	ADCY1	ADCY2	ADCY3	ADCY5	ADCY6	ADCY7	ADCY8	ADCY9	ADCY4	PRKACA	PRKACB	PRKACG	KCNJ3	KCNJ5	KCNJ6	KCNJ9	GABBR1	GABBR2	CREB3	CREB1	ATF2	ATF6B	CREB3L4	ATF4	CREB3L2	CREB3L3	CREB3L1	CREB5	GNAI1	GNAI2	GNAI3	GNAO1	OPRM1
Estrogen signaling pathway (04915_13)	SRC	PIK3CA	PIK3CB	PIK3CD	PIK3R1	PIK3R2	PIK3R3	AKT3	AKT1	AKT2	NOS3	CREB3	CREB1	ATF2	ATF6B	CREB3L4	ATF4	CREB3L2	CREB3L3	CREB3L1	CREB5	CALML6	CALML5	CALM1	CALM2	CALM3	CALML3	CALML4
Estrogen signaling pathway (04915_20)	ESR1	ESR2	FOS	JUN	SP1	MAP2K1	MAP2K2	MAPK1	MAPK3	CREB3	CREB1	ATF2	ATF6B	CREB3L4	ATF4	CREB3L2	CREB3L3	CREB3L1	CREB5	NCOA2	NCOA3	NCOA1	BCL2	EBAG9	KRT40	KRT25	KRT28	KRT24	KRT23	KRT27	KRT26	KRT9	KRT10	KRT12	KRT13	KRT14	KRT15	KRT16	KRT17	KRT18	KRT19	KRT31	KRT32	KRT33A	KRT33B	KRT34	KRT35	KRT39	KRT20
Melanogenesis (04916_4)	MITF	DCT	TYRP1	TYR	MAPK1	MAPK3	MAP2K1	MAP2K2	RAF1
Melanogenesis (04916_8)	MITF	CREBBP	EP300	PRKACA	PRKACB	PRKACG	LEF1	TCF7	TCF7L2	TCF7L1	CREB3	CREB1	CREB3L4	CREB3L2	CREB3L3	CREB3L1	CTNNB1
Prolactin signaling pathway (04917_3)	PRL	PRLR	JAK2	STAT1	STAT3	STAT5A	STAT5B	SHC2	SHC4	SHC3	SHC1	SRC	GRB2	SOCS4	SOCS7	SOCS1	SOCS2	SOCS3	SOCS6	SOCS5	CSN2	ELF5	CISH	TNFSF11	IRF1	TH	SLC2A2	GCK	INS	CCND2	LHCGR	ESR1	ESR2	CCND1
Prolactin signaling pathway (04917_14)	TNFSF11	TNFRSF11A	NFKB1	RELA	CCND1
Thyroid hormone signaling pathway (04919_1)	ITGB3	ITGAV	PRKCA	PRKCB	PRKCG	PLCD3	PLCB1	PLCE1	PLCB2	PLCB3	PLCB4	PLCD1	PLCG1	PLCG2	PLCD4	PLCZ1	HRAS	KRAS	NRAS	RAF1	MAP2K1	MAP2K2	STAT1	THRB	PRKACA	PRKACB	PRKACG	MAPK1	MAPK3	TP53	ESR1	SLC9A1	ATP1B4	ATP1A1	ATP1A2	ATP1A3	ATP1A4	ATP1B1	ATP1B2	ATP1B3	FXYD2
Thyroid hormone signaling pathway (04919_3)	AKT3	AKT1	AKT2	PIK3CA	PIK3CB	PIK3CD	PIK3R1	PIK3R2	PIK3R3	PRKCA	PRKCB	PRKCG	MAP2K1	MAP2K2	STAT1	THRA	THRB	MAPK1	MAPK3	TP53	ESR1	RCAN2	HIF1A	ATP1B4	ATP1A1	ATP1A2	ATP1A3	ATP1A4	ATP1B1	ATP1B2	ATP1B3	FXYD2	SRC
Thyroid hormone signaling pathway (04919_5)	GATA4	RCAN1	HIF1A	MYH6	ATP2A2	PLN	THRB	THRA	WNT4	CTNNB1	NOTCH1	NOTCH2	NOTCH3	NOTCH4	BMP4	CCND1	MYC
Thyroid hormone signaling pathway (04919_6)	AKT3	AKT1	AKT2	PDPK1	PIK3CA	PIK3CB	PIK3CD	PIK3R1	PIK3R2	PIK3R3	GSK3B	THRA	THRB	MAPK1	MAPK3	RCAN2	HIF1A	SLC2A1	TBC1D4	PFKFB2	ATP1B4	ATP1A1	ATP1A2	ATP1A3	ATP1A4	ATP1B1	ATP1B2	ATP1B3	FXYD2	MDM2	TSC2	BAD	FOXO1	CASP9	PFKP	ITGB3	ITGAV	SRC
Thyroid hormone signaling pathway (04919_8)	THRA	THRB	RXRA	RXRB	RXRG	NCOR1	SIN3A	HDAC1	HDAC2	HDAC3
Thyroid hormone signaling pathway (04919_9)	THRA	THRB	RXRA	RXRB	RXRG	KAT2A	KAT2B	NCOA2	NCOA3	NCOA1	CREBBP	EP300
Thyroid hormone signaling pathway (04919_10)	THRA	THRB	RXRA	RXRB	RXRG	MED16	MED12L	MED13L	MED4	MED30	MED14	MED17	MED27	MED24	MED12	MED13	MED1
Adipocytokine signaling pathway (04920_2)	NFKB1	RELA	NFKBIA	NFKBIB	NFKBIE	PTPN11	SOCS3	CPT1C	CPT1A	CPT1B	LEP	POMC	PRKAG2	PRKAG3	PRKAA1	PRKAA2	PRKAB1	PRKAB2	PRKAG1	PPARA	LEPR	CAMKK2	STK11	CHUK	IKBKB	IKBKG	STAT3	MAPK8	MAPK9	MAPK10	MTOR	IRS1	IRS4	IRS2	PPARGC1A	JAK2
Adipocytokine signaling pathway (04920_3)	NFKB1	RELA	PTPN11	SOCS3	CPT1C	CPT1A	CPT1B	ACSL1	ACSL3	ACSL4	ACSBG1	ACSL6	ACSL5	ACSBG2	LEP	POMC	PRKAG2	PRKAG3	PRKAA1	PRKAA2	PRKAB1	PRKAB2	PRKAG1	ACACB	PPARA	ADIPOR1	ADIPOR2	LEPR	CAMKK2	STK11	STAT3	IRS1	IRS4	IRS2	PPARGC1A	JAK2
Adipocytokine signaling pathway (04920_4)	SOCS3	CPT1C	CPT1A	CPT1B	G6PC	G6PC2	G6PC3	PCK1	PCK2	ACSL1	ACSL3	ACSL4	ACSBG1	ACSL6	ACSL5	ACSBG2	LEP	PRKAG2	PRKAG3	PRKAA1	PRKAA2	PRKAB1	PRKAB2	PRKAG1	ADIPOQ	ACACB	PPARA	ADIPOR1	ADIPOR2	LEPR	CAMKK2	STK11	SLC2A1	SLC2A4	STAT3	JAK2
Oxytocin signaling pathway (04921_2)	GNAQ	MYLK4	MYLK	MYLK2	MYLK3	ITPR1	ITPR2	ITPR3	CALML6	CALML5	CALM1	CALM2	CALM3	CALML3	CALML4	PLCB1	PLCB2	PLCB3	PLCB4	PRKCA	PRKCB	PRKCG	HRAS	KRAS	NRAS	RAF1	MAP2K1	MAP2K2	EEF2K	EEF2	CAMK1D	CAMK1G	CAMK4	CAMK2A	CAMK2B	CAMK2D	CAMK2G	CAMK1	CAMKK2	PPP3CA	PPP3CB	PPP3CC	PPP3R1	PPP3R2	CD38	TRPM2	RYR1	RYR2	RYR3
Oxytocin signaling pathway (04921_4)	MYLK4	MYLK	MYLK2	MYLK3	CALML6	CALML5	CALM1	CALM2	CALM3	CALML3	CALML4	PLCB1	PLCB2	PLCB3	PLCB4	PRKCA	PRKCB	PRKCG	RAF1	EEF2K	CAMK1D	CAMK1G	CAMK4	CAMK2A	CAMK2B	CAMK2D	CAMK2G	CAMK1	NOS3	MYL9	MYL6B	MYL6	CAMKK2	PRKAG2	PRKAG3	PRKAA1	PRKAA2	PRKAB1	PRKAB2	PRKAG1	PPP3CA	PPP3CB	PPP3CC	PPP3R1	PPP3R2	NFATC1	NFATC2	NFATC3	NFATC4
Oxytocin signaling pathway (04921_6)	PRKCA	PRKCB	PRKCG	HRAS	KRAS	NRAS	RAF1	MAP2K1	MAP2K2	MAPK1	MAPK3	PLA2G4B	PLA2G4E	PLA2G4F	PLA2G4D	PLA2G4A	PLA2G4C	JMJD7-PLA2G4B	PTGS2	JUN	FOS	MEF2C	CCND1	ELK1
Oxytocin signaling pathway (04921_8)	MYLK4	MYLK	MYLK2	MYLK3	CALML6	CALML5	CALM1	CALM2	CALM3	CALML3	CALML4	PRKCA	PRKCB	PRKCG	CAMK1D	CAMK1G	CAMK4	CAMK2A	CAMK2B	CAMK2D	CAMK2G	CAMK1	MYL9	MYL6B	MYL6	ACTB	ACTG1	PPP1R12A	PPP1R12B	PPP1R12C	PPP1CA	PPP1CB	PPP1CC	CAMKK2	PPP3CA	PPP3CB	PPP3CC	PPP3R1	PPP3R2
Oxytocin signaling pathway (04921_9)	GNAQ	ADCY1	ADCY2	ADCY3	ADCY5	ADCY6	ADCY7	ADCY8	ADCY9	ADCY4	GNAS	OXTR	OXT	PLCB1	PLCB2	PLCB3	PLCB4	HRAS	KRAS	NRAS	RHOA	ROCK1	ROCK2	CACNG3	CACNG2	CACNG5	CACNG4	CACNA2D3	CACNG8	CACNG7	CACNG6	CACNA1C	CACNA1D	CACNA1F	CACNA1S	CACNA2D1	CACNB1	CACNB2	CACNB3	CACNB4	CACNG1	CACNA2D2	CACNA2D4	GNAI1	GNAI2	GNAI3	GNAO1	PIK3R6	PIK3R5
Glucagon signaling pathway (04922_4)	PKM	GNAS	ADCY2	PRKACA	PRKACB	PRKACG	GYS1	GYS2	PYGB	PYGL	PYGM	PLCB1	PLCB2	PLCB3	PLCB4	CREB3	CREB1	ATF2	CREB3L4	ATF4	CREB3L2	CREB3L3	CREB3L1	CREB5	PPP4C	PPP4R3A	PPP4R3B	CRTC2	SIK2	AKT3	AKT1	AKT2	PDE3B	PHKA1	PHKA2	PHKB	PHKG1	PHKG2	CALML6	CALML5	CALM1	CALM2	CALM3	CALML3	CALML4	PFKFB1	ACACA	ACACB	PRKAG2
Glucagon signaling pathway (04922_5)	PKM	ADCY2	PRKACA	PRKACB	PRKACG	GYS1	GYS2	CREB3	CREB1	ATF2	CREB3L4	ATF4	CREB3L2	CREB3L3	CREB3L1	CREB5	PPP4C	PPP4R3A	PPP4R3B	CRTC2	SIK2	PPARGC1A	PCK1	PCK2	G6PC	G6PC2	G6PC3	SIK1	PDE3B	CPT1C	CPT1A	CPT1B	PHKA1	PHKA2	PHKB	PHKG1	PHKG2	CALML6	CALML5	CALM1	CALM2	CALM3	CALML3	CALML4	PPP3CA	PPP3CB	PPP3CC	PPP3R1	PPP3R2
Regulation of lipolysis in adipocytes (04923_6)	INS	INSR	PIK3CA	PIK3CB	PIK3CD	PIK3R1	PIK3R2	PIK3R3	IRS1	IRS4	IRS2	PLAAT3	PNPLA2	ABHD5
Renin secretion (04924_1)	GNAS	ADCY5	ADCY6	PRKACA	PRKACB	PRKACG	ADRB1	ADRB2	ADRB3	GNAI1	GNAI2	GNAI3	ADORA1	CREB1	PTGER2	PTGER4	KCNMA1	PDE1A	PDE1C	PDE1B	CALML6	CALML5	CALM1	CALM2	CALM3	CALML3	CALML4	PPP3CA	PPP3CB	PPP3CC	PPP3R1	PPP3R2	ADCYAP1R1
Aldosterone synthesis and secretion (04925_2)	ITPR1	ITPR2	ITPR3	KCNK3	KCNK9	PLCB1	PLCB2	PLCB3	PLCB4	GNA11	GNAQ	CREB3	CREB1	ATF2	ATF6B	CREB3L4	ATF4	CREB3L2	CREB3L3	CREB3L1	CREB5	PRKCA	PRKCB	PRKCE	PRKCG	PRKD3	PRKD2	PRKD1	ATF1
Aldosterone synthesis and secretion (04925_3)	CREB3	CREB1	ATF2	ATF6B	CREB3L4	ATF4	CREB3L2	CREB3L3	CREB3L1	CREB5	ADCY1	ADCY2	ADCY3	ADCY5	ADCY6	ADCY7	ADCY8	ADCY9	ADCY4	CALML6	CALML5	CALM1	CALM2	CALM3	CALML3	CALML4	PRKCA	PRKCB	PRKCE	PRKCG	PRKD3	PRKD2	PRKD1	CAMK1D	CAMK1G	CAMK4	CAMK2A	CAMK2B	CAMK2D	CAMK2G	CAMK1	NR4A2	NR4A1	CYP11B2	STAR	PRKACA	PRKACB	PRKACG	ATF1
Relaxin signaling pathway (04926_6)	AKT3	AKT1	AKT2	NOS3	PIK3CA	PIK3CB	PIK3CD	PIK3R1	PIK3R2	PIK3R3	GNB5	GNB1	GNB2	GNB3	GNG3	GNG4	GNG5	GNG7	GNG10	GNG11	GNGT1	GNGT2	GNG13	GNG2	GNG12	GNB4	GNG8	PRKCZ	ADCY5	NOS2	SMAD2	SMAD3	MMP1	MMP2	MMP9	MMP13	NOS1	RAF1
Relaxin signaling pathway (04926_7)	NFKBIA	NFKB1	RELA	MAPK1	MAPK3	CREB3	CREB1	ATF2	ATF6B	CREB3L4	ATF4	CREB3L2	CREB3L3	CREB3L1	CREB5	PRKACA	PRKACB	PRKACG	VEGFD	VEGFA	VEGFB	VEGFC	NOS2	NOS1	MMP2	MMP9	MAP2K1	MAP2K2
Relaxin signaling pathway (04926_12)	AKT3	AKT1	AKT2	NOS3	NOS2	TGFB1	SMAD2	SMAD3	ACTA2	COL1A1	COL1A2	COL3A1	COL4A1	COL4A2	COL4A3	COL4A4	COL4A5	COL4A6	MMP1	MMP2	MMP9	MMP13	NOS1	TGFBR1	TGFBR2
Relaxin signaling pathway (04926_18)	GNB5	GNB1	GNB2	GNB3	GNG3	GNG4	GNG5	GNG7	GNG10	GNG11	GNGT1	GNGT2	GNG13	GNG2	GNG12	GNB4	GNG8	NFKBIA	HRAS	KRAS	NRAS	RAF1	PLCB1	PLCB2	PLCB3	PLCB4	PRKCA	SOS1	SOS2	NFKB1	RELA	MAP2K7	MAP2K4	MAPK14	MAPK11	MAPK13	MAPK12	MAPK8	MAPK9	MAPK10
Cortisol synthesis and secretion (04927_3)	PLCB1	PLCB2	PLCB3	PLCB4	GNA11	GNAQ	CACNA1I	CACNA1H	CACNA1G	CREB3	CREB1	ATF2	ATF6B	CREB3L4	ATF4	CREB3L2	CREB3L3	CREB3L1	CREB5	ADCY1	ADCY2	ADCY3	ADCY5	ADCY6	ADCY7	ADCY8	ADCY9	ADCY4	AGTR1	PRKACA	PRKACB	PRKACG	KCNK2	NR5A1	NR4A1	SP1	PBX1
Parathyroid hormone synthesis, secretion and action (04928_6)	PTH	GATA3	GCM1	GCM2	VDR	MAFB	SP1	MAPK1	MAPK3	EGR1
Parathyroid hormone synthesis, secretion and action (04928_7)	PLCB1	PLCB2	PLCB3	PLCB4	GNA11	GNAQ	ADCY1	ADCY2	ADCY3	ADCY5	ADCY6	ADCY7	ADCY8	ADCY9	ADCY4	GNAS	PTH	PTH1R	PTHLH	ARRB1	ARRB2	ARAF	RAF1	BRAF	GNAI1	GNAI2	GNAI3	MMP24	MMP14	MMP15	MMP16	MMP17	MMP25	GNA13	GNA12	AKAP13	ARHGEF1	ARHGEF11
Parathyroid hormone synthesis, secretion and action (04928_12)	GNAI1	GNAI2	GNAI3	MMP24	MMP14	MMP15	MMP16	MMP17	MMP25	EGFR	MAPK1	MAPK3	HBEGF
Parathyroid hormone synthesis, secretion and action (04928_15)	PTH1R	GNA13	GNA12	AKAP13	ARHGEF1	ARHGEF11	RHOA	PLD1	PLD2
Parathyroid hormone synthesis, secretion and action (04928_16)	ITPR1	ITPR2	ITPR3	PLCB1	PLCB2	PLCB3	PLCB4	GNA11	GNAQ	GNAS	PRKACA	PRKACB	PRKACG	PRKCA	PRKCB	PRKCG	TRPV5	SLC9A3R1	SLC34A2	SLC34A3	SLC34A1
Parathyroid hormone synthesis, secretion and action (04928_17)	ADCY1	ADCY2	ADCY3	ADCY5	ADCY6	ADCY7	ADCY8	ADCY9	ADCY4	GNAS	PRKACA	PRKACB	PRKACG	PRKCA	PRKCB	PRKCG	TRPV5	SLC9A3R1	CYP27B1	CYP24A1	FGF23	TNFSF11	SOST	CREB3	CREB1	ATF2	ATF6B	CREB3L4	ATF4	CREB3L2	CREB3L3	CREB3L1	CREB5	BCL2	CDKN1A	FOS	NACA	RUNX2	MMP13	SLC34A2	SLC34A3	SLC34A1	MEF2A	MEF2C	MEF2D	NR4A2
Parathyroid hormone synthesis, secretion and action (04928_18)	NACA	JUND	BGLAP	LRP6	LRP5
Type II diabetes mellitus (04930_3)	PIK3CA	PIK3CB	PIK3CD	PIK3R1	PIK3R2	PIK3R3	SLC2A4	IRS1	INSR	SOCS4	SOCS1	SOCS2	SOCS3	MAPK1	MAPK3	ADIPOQ	IKBKB	PRKCD	PRKCE	IRS4	IRS2	MAPK8	MAPK9	MAPK10	PRKCZ	TNF	MTOR
Type II diabetes mellitus (04930_4)	PDX1	CACNA1A	CACNA1B	CACNA1C	CACNA1D	CACNA1E	CACNA1G	INS	MAFA	KCNJ11	ABCC8
Insulin resistance (04931_2)	MAPK8	MAPK9	MAPK10	TNFRSF1A	IKBKB	MTOR	RPS6KB1	RPS6KB2	INSR	IRS1	PIK3CA	PIK3CB	PIK3CD	PIK3R1	PIK3R2	PIK3R3	PRKCB	PRKCD	PRKCQ	INS	PTPA	STAT3	SOCS3	NFKBIA	NFKB1	RELA	NOS3	PTPN1	PTPN11	PTPRF	PRKCZ
Insulin resistance (04931_7)	INSR	IRS1	INS	PRKCB	PPP1CA	PPP1CB	PPP1CC	PPP1R3A	PPP1R3C	PPP1R3D	PPP1R3B	PTPN1	PTPN11	PTPRF	RPS6KA6	RPS6KA1	RPS6KA2	RPS6KA3
Insulin resistance (04931_9)	AKT2	PTPA	PPARGC1A	PPARA	TRIB3
Insulin resistance (04931_16)	INSR	INS	IRS1	PIK3CA	PIK3CB	PIK3CD	PIK3R1	PIK3R2	PIK3R3	PDPK1	AKT3	AKT1	AKT2	GSK3B	FOXO1	PTEN	OGA	OGT	NOS3	NR1H3	NR1H2	SREBF1	GYS1	GYS2	MLXIP	MLXIPL	MLX
Non-alcoholic fatty liver disease (NAFLD) (04932_7)	PPARA	ADIPOQ	PRKAG2	PRKAG3	PRKAA1	PRKAA2	PRKAB1	PRKAB2	PRKAG1	ADIPOR1	ADIPOR2	EIF2AK3	ERN1	CDC42	RAC1	TNF	FASLG	RXRA
Non-alcoholic fatty liver disease (NAFLD) (04932_9)	CASP8	BID	CYCS	CASP3	CASP7	FAS	ITCH
Non-alcoholic fatty liver disease (NAFLD) (04932_18)	PPARA	ADIPOQ	FAS	EIF2AK3	EIF2S1	ERN1	TRAF2	IKBKB	MAP3K5	CDC42	RAC1	MAP3K11	TNF	MAPK8	MAPK9	MAPK10	FASLG	XBP1	RXRA	CEBPA
AGE-RAGE signaling pathway in diabetic complications (04933_1)	CYBB	NOX1	NOX4	AGER	JAK2	STAT5A	STAT5B	CCND1	STAT1	STAT3	DIAPH1	PIK3CA	PIK3CB	PIK3CD	PIK3R1	PIK3R2	PIK3R3	PIM1	NFATC1	COL1A1	COL1A2	PLCD3	PLCB1	PLCE1	PLCB2	PLCB3	PLCB4	PLCD1	PLCG1	PLCG2	PLCD4
AGE-RAGE signaling pathway in diabetic complications (04933_2)	CYBB	NOX1	NOX4	AGER	NFKB1	RELA	HRAS	KRAS	NRAS	MAPK14	MAPK11	MAPK13	MAPK12	MAPK1	MAPK3	SMAD2	SMAD3	EDN1	F3	THBD	IL1A	IL1B	IL6	TNF	VCAM1	ICAM1	CXCL8	JUN	AKT3	AKT1	AKT2	DIAPH1	MAPK8	MAPK9	MAPK10	PIK3CA	PIK3CB	PIK3CD	PIK3R1	PIK3R2	PIK3R3	RAC1	CDC42	VEGFD	VEGFA	VEGFB	VEGFC	CCL2	SERPINE1
Cushing's syndrome (04934_8)	EGFR	MAPK1	MAPK3	POMC	USP8	BRAF	MAP2K1	MAP2K2	NR4A1
Cushing's syndrome (04934_12)	CCND1	CDKN1A	CDK4	CDK6	RB1	E2F1	E2F2	E2F3	CDK2	CCNE1	CCNE2	CDKN1B	CDKN2B	CDKN2A	AHR	ARNT	CDKN2C	MEN1	WDR5	KMT2A	WDR5B	RBBP5	KMT2D	ASH2L
Maturity onset diabetes of the young (04950_1)	HNF1B	HES1	ONECUT1	NEUROD1	PAX4	NEUROG3	NKX2-2	PAX6	NKX6-1
Maturity onset diabetes of the young (04950_2)	GCK	PDX1	MAFA	NKX2-2	INS	IAPP	NEUROD1	NKX6-1	PAX6	HNF4A	FOXA2
Maturity onset diabetes of the young (04950_3)	PDX1	FOXA3	MAFA	HNF4G	HNF1A	SLC2A2	NKX6-1	PKLR	PAX6	HNF4A	FOXA2
Maturity onset diabetes of the young (04950_4)	NR5A2	PDX1	HHEX	MNX1	ONECUT1
Aldosterone-regulated sodium reabsorption (04960_2)	SCNN1A	SCNN1B	SCNN1G	ATP1B4	ATP1A1	ATP1A2	ATP1A3	ATP1A4	ATP1B1	ATP1B2	ATP1B3	FXYD2	SGK1	NR3C2	KRAS	NEDD4L	FXYD4	PIK3CA	PIK3CB	PIK3CD	PIK3R1	PIK3R2	PIK3R3	PDPK1	KCNJ1	SFN
Endocrine and other factor-regulated calcium reabsorption (04961_3)	VDR	SLC8A1	ATP2B1	CALB1	TRPV5	ESR1	ATP1B4	ATP1A1	ATP1A2	ATP1A3	ATP1A4	ATP1B1	ATP1B2	ATP1B3	FXYD2	KL
Vasopressin-regulated water reabsorption (04962_2)	AVPR2	GNAS	ADCY3	ADCY6	ADCY9	PRKACA	PRKACB	PRKACG	CREB3	CREB1	CREB3L4	CREB3L2	CREB3L3	CREB3L1	CREB5	AQP2	ARHGDIA	ARHGDIB	ARHGDIG
Salivary secretion (04970_1)	ADRB1	ADRB2	ADRB3	ADRA1D	ADRA1B	ADRA1A	GNAS	ADCY1	ADCY2	ADCY3	ADCY5	ADCY6	ADCY7	ADCY8	ADCY9	ADCY4	PRKACA	PRKACB	PRKACG
Salivary secretion (04970_6)	RYR3	NOS1	GUCY1A2	GUCY1A1	GUCY1B1	PRKG1	PRKG2	BST1	CD38
Salivary secretion (04970_7)	BEST2	CALML6	CALML5	CALM1	CALM2	CALM3	CALML3	CALML4	NOS1	GUCY1A2	GUCY1A1	GUCY1B1	PRKG1	PRKG2	KCNN4	KCNMA1	AQP5
Gastric acid secretion (04971_2)	ADCY1	ADCY2	ADCY3	ADCY5	ADCY6	ADCY7	ADCY8	ADCY9	ADCY4	PRKACA	PRKACB	PRKACG	HRH2	GNAS	KCNQ1	KCNE2	EZR	GNAI1	GNAI2	GNAI3	SSTR2	KCNJ1	KCNJ2	KCNJ10	KCNJ15	KCNJ16
Carbohydrate digestion and absorption (04973_2)	SLC2A2	TAS1R2	TAS1R3	GNAT3	PLCB2	PRKCB
Bile secretion (04976_2)	SLCO1B1	SLCO1B3	SLCO1B7	SLCO1A2	SLC10A1	ABCB11	ABCC2	CYP7A1	NR1H4	NR0B2	RXRA
Bile secretion (04976_3)	ABCB4	SLC51A	SLC51B	NR1H4	RXRA
Mineral absorption (04978_1)	S100G	ATP2B1	SLC8A1	VDR	TRPV6	SLC34A2
Cholesterol metabolism (04979_1)	ANGPTL3	ANGPTL4	ANGPTL8	APOH	APOC2	LPL
Cholesterol metabolism (04979_7)	PCSK9	LDLR	APOB	SORT1
Cholesterol metabolism (04979_13)	STAR	VDAC1	VDAC2	VDAC3	STARD3	TSPO
Alzheimer's disease (05010_1)	APP	APBB1	GAPDH	NAE1
Alzheimer's disease (05010_4)	PSEN1	PSEN2	EIF2AK3	ERN1	ATF6
Alzheimer's disease (05010_5)	CAPN1	CAPN2	CDK5R1	CDK5	MAPT	GSK3B
Parkinson's disease (05012_3)	CYCS	HTRA2	PPIF	SLC25A4	SLC25A5	SLC25A6	VDAC1	VDAC2	VDAC3	SLC25A31	CASP9	CASP3	APAF1
Amyotrophic lateral sclerosis (ALS) (05014_1)	SOD1	MAP3K5	MAP2K3	MAP2K6	MAPK14	MAPK11	MAPK13	MAPK12	NEFL	NEFM	NEFH	PRPH
Amyotrophic lateral sclerosis (ALS) (05014_2)	SLC1A2	TOMM40	TOMM40L	SOD1	CYCS	BAX	BAD	BCL2	BCL2L1	CASP9	DERL1	PPP3CA	PPP3CB	PPP3CC	PPP3R1	PPP3R2
Amyotrophic lateral sclerosis (ALS) (05014_3)	SOD1	CYCS	CASP3	BAX	BAD	BCL2	BCL2L1	APAF1	CASP9
Huntington's disease (05016_5)	CLTA	CLTB	CLTC	CLTCL1	AP2M1	AP2S1	AP2A1	AP2A2	AP2B1	HTT	HIP1
Prion diseases (05020_7)	PRNP	MAP2K1	MAP2K2	MAPK1	MAPK3	ELK1	NOTCH1
Prion diseases (05020_8)	PRNP	NCAM1	NCAM2	LAMC1	STIP1	PRKACA	PRKACB	PRKACG	SOD1	BAX	FYN
Cocaine addiction (05030_4)	PRKACA	PRKACB	PRKACG	JUN	FOSB	CDK5	NFKB1	RELA	GRIA2	PPP1R1B	GRIN3A	GRIN3B	GRIN1	GRIN2A	GRIN2B	GRIN2C	GRIN2D	DLG4	CDK5R1
Amphetamine addiction (05031_7)	PPP1R1B	PPP1CA	PPP1CB	PPP1CC	CREB3	CREB1	ATF2	ATF6B	CREB3L4	ATF4	CREB3L2	CREB3L3	CREB3L1	CREB5	FOSB	HDAC1	FOS	SIRT1	JUN
Amphetamine addiction (05031_8)	SLC6A3	STX1A	PRKCA	PRKCB	PRKCG	CAMK2A	CAMK2B	CAMK2D	CAMK2G
Alcoholism (05034_9)	CREB3	CREB1	ATF2	ATF6B	CREB3L4	ATF4	CREB3L2	CREB3L3	CREB3L1	CREB5	CAMK4	CALML6	CALML5	CALM1	CALM2	CALM3	CALML3	CALML4	CAMKK2	CAMKK1	HRAS	KRAS	NRAS	ARAF	RAF1	BRAF	MAP2K1	MAPK1	MAPK3
Bacterial invasion of epithelial cells (05100_1)	CTNNB1	CTNNA1	CTNNA2	CTNNA3	CDH1	ARHGAP10	ARPC5	ARPC4	ARPC3	ARPC1B	ARPC2	ARPC1A	ARPC5L	ACTB	ACTG1	PXN
Bacterial invasion of epithelial cells (05100_5)	SRC	CTTN	HCLS1	PTK2	DNM1	DNM2	DNM3	BCAR1
Bacterial invasion of epithelial cells (05100_8)	CTNNB1	ARHGAP10	ARPC5	ARPC4	ARPC3	ARPC1B	ARPC2	ARPC1A	ARPC5L	ACTB	ACTG1	PXN	BCAR1	WASF2	WASF1	WAS	WASL	ILK
Bacterial invasion of epithelial cells (05100_12)	RHOG	ARHGEF26	DOCK1	CRK	CRKL	RAC1	ELMO2	ELMO3	ELMO1
Vibrio cholerae infection (05110_2)	CFTR	GNAS	KCNQ1	SLC12A2	PRKACA	PRKACB	PRKACG	ADCY3	ADCY9
Epithelial cell signaling in Helicobacter pylori infection (05120_6)	ADAM17	HBEGF	ADAM10	CXCL8	CXCR1	CXCR2	EGFR
Shigellosis (05131_3)	NOD1	NOD2	RIPK2	IKBKG	CHUK	IKBKB	NFKBIA	NFKBIB	NFKB1	RELA	MAPK8	MAPK9	MAPK10	MAPK1	MAPK3	MAPK14	MAPK11	MAPK13	MAPK12	CXCL8	U2AF1L4	U2AF1	UBE2D2	FBXW11	BTRC
Salmonella infection (05132_1)	RAC1	CDC42	NFKB1	RELA	MAPK8	MAPK9	MAPK10	TJP1	WASF2	WASF1	ARPC5	ARPC4	ARPC3	ARPC1B	ARPC2	ARPC1A	ARPC5L	WAS	WASL	FOS	JUN	RHOG	MAPK1	MAPK3	MAPK14	MAPK11	MAPK13	MAPK12
Pertussis (05133_6)	C1R	C1S	C1QA	C1QB	C1QC	C4BPA	C4BPB	SERPING1	C4A	C4B	C2	C3	C5
Legionellosis (05134_1)	NLRC4	PYCARD	CASP1	IL1B	IL18	NAIP	CASP7
Legionellosis (05134_7)	TLR5	TLR2	TLR4	CD14	MYD88	TNF	IL1B	IL6	CXCL8	IL12A	IL12B	CXCL1	CXCL2	CXCL3
Leishmaniasis (05140_4)	FCGR1A	FCGR2A	FCGR3A	FCGR3B	FCGR2C	PRKCB	NCF1	PTPN6	MAPK1	MAPK3	ELK1	CYBB	MAPK14	MAPK11	MAPK13	MAPK12	JUN	CYBA	NCF2	NCF4	PTGS2	NA
Leishmaniasis (05140_5)	IFNG	JAK1	JAK2	STAT1	PTPN6	MAPK1	MAPK3	IFNGR1	IFNGR2
Chagas disease (American trypanosomiasis) (05142_3)	TLR2	IFNG	TLR9	MYD88	IRAK1	IRAK4	TNF	IFNGR1	IFNGR2	NOS2	TNFRSF1A	IL10	TGFB1	TGFB2	TGFB3	TLR6
Chagas disease (American trypanosomiasis) (05142_5)	MYD88	IRAK1	IRAK4	TRAF6	MAP2K4	MAPK8	MAPK9	MAPK10	MAPK14	MAPK11	MAPK13	MAPK12	MAPK1	MAPK3	FOS	JUN	NFKBIA	NFKB1	RELA	CHUK	IKBKB	IKBKG	PPP2CA	PPP2CB	PPP2R1A	PPP2R1B	PPP2R2A	PPP2R2B	PPP2R2C	PPP2R2D
Chagas disease (American trypanosomiasis) (05142_7)	GNAI1	GNAI2	GNAI3	GNAO1	BDKRB2	GNA11	GNA15	GNAQ	GNA14	PLCB1	PLCB2	PLCB3	PLCB4
Chagas disease (American trypanosomiasis) (05142_12)	FASLG	FAS	CD3D	CD3E	CD3G	CD247	CASP8	NFKBIA	NFKB1	RELA
African trypanosomiasis (05143_2)	IFNG	TNF	SELE	VCAM1	ICAM1	IDO2	IDO1
Toxoplasmosis (05145_3)	IRAK1	IRAK4	TRAF6	MAP3K7	TAB1	TAB2	CHUK	IKBKB	IKBKG	NFKBIA	NFKBIB	MAPK1	MAPK3	MAPK8	MAPK9	MAPK10	MAPK14	MAPK11	MAPK13	MAPK12	MAP2K3	MAP2K6
Toxoplasmosis (05145_9)	GNAI1	GNAI2	GNAI3	GNAO1	PIK3R6	PIK3R5	PIK3CG	PDPK1	AKT3	AKT1	AKT2	BAD
Toxoplasmosis (05145_11)	MYD88	IRAK1	IRAK4	TRAF6	LY96	TLR4	HSPA1A	HSPA1B	HSPA1L	HSPA2	HSPA6	HSPA8	TLR2
Toxoplasmosis (05145_13)	CASP9	CASP3	CASP8	TNF	TNFRSF1A	BIRC8	BIRC2	BIRC3	XIAP	BIRC7
Staphylococcus aureus infection (05150_5)	CFD	C3	C5	C1S	C1R	C1QA	C1QB	C1QC	C4A	C4B	C2	MASP2	MASP1	PLG	NA	CFI	FCGR1A	FCGR2A	FCGR2B	FCGR3A	FCGR3B	FCGR2C	CFH	C3AR1
Tuberculosis (05152_1)	PLA2R1	MRC1	MRC2	CLEC4M	CD209	RAF1	IL10	ARHGEF12	RHOA	LSP1	KSR1	PLK3	TGFB1	TGFB2	TGFB3
Tuberculosis (05152_2)	RAF1	STAT1	JAK1	JAK2	RFX5	RFXAP	RFXANK	CREB1	NFYA	NFYB	NFYC	CEBPB	CEBPG	CIITA	MAPK1	MAPK3	NFKB1	RELA	TRAF6	TNF	IL12A	IL12B	IL1A	IL1B	IL6	IL18	IL23A	RIPK2	CARD9	MALT1	BCL10	MAPK8	MAPK9	MAPK10	MAPK14	MAPK11	MAPK13	MAPK12	CAMK2A	CAMK2B	CAMK2D	CAMK2G	NOS2
Tuberculosis (05152_3)	RAB5A	RAB5B	RAB5C	PIK3C3	TCIRG1	ATP6V0A2	ATP6V0D2	ATP6V0A4	ATP6V1H	ATP6V0C	ATP6V0B	ATP6V0A1	ATP6AP1	ATP6V0D1	EEA1	LAMP1	LAMP2	RAB7A	CTSD	CAMK2A	CAMK2B	CAMK2D	CAMK2G
Tuberculosis (05152_5)	RAB5A	RAB5B	RAB5C	PIK3C3	EEA1	CALML6	CALML5	CALM1	CALM2	CALM3	CALML3	CALML4	CAMK2A	CAMK2B	CAMK2D	CAMK2G	PPP3CA	PPP3CB	PPP3CC	PPP3R1	PPP3R2
Tuberculosis (05152_7)	ITGB2	ITGAM	ITGAX	C3
Tuberculosis (05152_10)	STAT1	JAK1	JAK2	RFX5	RFXAP	RFXANK	CREB1	NFYA	NFYB	NFYC	CEBPB	CEBPG	CIITA	NFKB1	RELA	CD74	HLA-DMA	HLA-DMB	HLA-DOA	HLA-DOB	HLA-DPA1	HLA-DPB1	HLA-DQA1	HLA-DQA2	HLA-DQB1	HLA-DRA	HLA-DRB1	HLA-DRB3	HLA-DRB4	HLA-DRB5	CTSS	CAMK2A	CAMK2B	CAMK2D	CAMK2G	NOS2
Tuberculosis (05152_11)	TLR2	CD14	MYD88	IRAK4	TLR4	TLR6	TLR1	TNFRSF1A	FADD	CASP8	TIRAP	VDR	CYP27B1	CAMP	HSPD1	HSPA9	IRAK1	IRAK2
Tuberculosis (05152_12)	RAF1	STAT1	CEBPB	CEBPG	CIITA	MAPK1	MAPK3	NFKB1	RELA	TRAF6	TNF	IL12A	IL12B	IL1A	IL1B	IL6	RHOA	LSP1	KSR1	PLK3	IL18	IL23A	NOD2	RIPK2	SYK	CARD9	MALT1	BCL10	MAPK8	MAPK9	MAPK10	MAPK14	MAPK11	MAPK13	MAPK12	IRAK1	IRAK2	NOS2
Tuberculosis (05152_14)	TLR2	MYD88	IRAK4	TLR4	TLR6	TLR1	CASP3	TNF	TNFRSF1A	TRADD	FADD	CASP10	CASP8	BID	TIRAP	VDR	CYP27B1
Tuberculosis (05152_15)	MYD88	CASP3	TNFRSF1A	TRADD	FADD	CASP10	CASP8	BID	CYCS	APAF1	CASP9	BAX	TIRAP
Tuberculosis (05152_16)	CASP3	AKT3	AKT1	AKT2	CYCS	APAF1	BAD	CASP9	BCL2	BAX	CAMK2A	CAMK2B	CAMK2D	CAMK2G
Tuberculosis (05152_17)	STAT1	CASP3	CASP8	BID	CYCS	APAF1	BAD	CASP9	BCL2	BAX	CAMK2A	CAMK2B	CAMK2D	CAMK2G
Hepatitis C (05160_1)	DDX58	MAVS	TRAF3	TBK1	IKBKE	IRF3	IRF7	TLR3	TICAM1	IKBKG	CHUK	IKBKB	TRAF6	RIPK1
Hepatitis C (05160_2)	DDX58	MAVS	TRAF3	NFKB1	RELA	TICAM1	NFKBIA	IKBKG	CHUK	IKBKB	TRAF6	EIF2AK1	EIF2AK4	EIF2AK2	EIF2AK3
Hepatitis C (05160_4)	IFNA1	IFNA2	IFNA4	IFNA5	IFNA6	IFNA7	IFNA8	IFNA10	IFNA13	IFNA14	IFNA16	IFNA17	IFNA21	IFNB1	IFNAR1	IFNAR2	JAK1	TYK2	STAT1	STAT2	IRF9	SOCS3	PPP2CA	PPP2CB	PPP2R1A	PPP2R1B	PPP2R2A	PPP2R2B	PPP2R2C	PPP2R2D	PIAS1
Hepatitis C (05160_7)	NFKBIA	EIF2AK1	EIF2AK4	EIF2AK2	EIF2AK3	EIF2S1	IRF1	MAPK14	MAPK11	MAPK13	MAPK12	MAPK1	MAPK3	HRAS	KRAS	NRAS	ARAF	RAF1	BRAF	MAPK8	MAPK9	MAPK10
Hepatitis C (05160_12)	TNF	TNFRSF1A	TRADD	TRAF2	NFKBIA	NFKB1	RELA
Measles (05162_1)	TLR7	TLR9	MYD88	IRAK1	IRAK4	IRF7	MAVS	CHUK
Measles (05162_2)	TLR2	TLR4	MYD88	IRAK1	IRAK4	TRAF6	TNFAIP3	MAP3K7	TAB2
Measles (05162_4)	IRAK1	IRAK4	IRF7	DDX58	NFKBIA	NFKBIB	NFKB1	RELA	IFIH1	MAVS	IRF3	CHUK	IKBKE	TBK1
Measles (05162_10)	SLAMF1	SH2D1A	FYN	DOK1	PRKCQ
Measles (05162_11)	IL2RA	IL2RB	IL2RG	IL2	CD3D	CD3E	CD3G	CD28	PIK3CA	PIK3CB	PIK3CD	PIK3R1	PIK3R2	PIK3R3	AKT3	AKT1	AKT2	JAK1	JAK3	STAT3	STAT5A	STAT5B	CBLB
Influenza A (05164_2)	DDX58	IFIH1	MAVS	TBK1	IKBKE	TLR3	TICAM1	IKBKB	NFKB1	RELA	NFKBIA	NFKBIB	MAP2K3	MAP2K6	MAPK14	MAPK11	MAPK13	MAPK12	MAP2K7	MAP2K4	MAPK8	MAPK9	MAPK10	EIF2AK1	EIF2AK4	EIF2AK2	EIF2AK3	TLR4
Influenza A (05164_8)	DDX58	TBK1	IKBKE	TLR3	TICAM1	IKBKB	IRF3	PIK3CA	PIK3CB	PIK3CD	PIK3R1	PIK3R2	PIK3R3	AKT3	AKT1	AKT2	MAP2K3	MAP2K6	MAP2K7	MAP2K4	CASP9	GSK3B	TLR4
Influenza A (05164_13)	DDX58	MAVS	TRIM25	TLR3	TICAM1	IKBKB	NFKBIA	NFKBIB	PIK3CA	PIK3CB	PIK3CD	PIK3R1	PIK3R2	PIK3R3	SOCS3	MAP2K3	MAP2K6	MAPK14	MAPK11	MAPK13	MAPK12	MAP2K7	MAP2K4	MAPK8	MAPK9	MAPK10	EIF2AK1	EIF2AK4	EIF2AK2	EIF2AK3	DNAJC3	EIF2S1
Influenza A (05164_15)	NFKBIA	NFKBIB	MAP2K3	MAP2K6	MAP2K7	MAP2K4	EIF2AK1	EIF2AK4	EIF2AK2	EIF2AK3	DNAJC3	HSPA1A	HSPA1B	HSPA1L	HSPA2	HSPA6	HSPA8	DNAJB1	EIF2S1
Human papillomavirus infection (05165_15)	MAGI1	PTEN	PARD3	PARD6A	PARD6G	PARD6B	PRKCI	PRKCZ	CDC42	SCRIB	DLG1	DLG2	DLG3	LLGL2	LLGL1	CRB3	PATJ	MPP5	UBE3A
Human papillomavirus infection (05165_19)	NOTCH1	NOTCH2	NOTCH3	NOTCH4	RBPJL	RBPJ	MAML3	MAML2	MAML1	HES1	HES5	HES3	HES2	HES6	HES4	HES7	HEY1	HEY2	HEYL
Human papillomavirus infection (05165_30)	TERT	TCF7	TCF7L2	TCF7L1	CTNNB1	UBE3A
Human papillomavirus infection (05165_31)	HDAC6	HDAC5	HDAC1	HDAC2	HDAC7	HDAC8	HDAC11	HDAC10	HDAC3	HDAC9	HDAC4	CHD4	IRF1	IFNB1
HTLV-I infection (05166_1)	SLC2A1	TGFB1	TGFB2	TGFB3	TGFBR1	TGFBR2	SMAD2	SMAD3	SMAD4	CREBBP	EP300	TCF3	TP53	MYB
HTLV-I infection (05166_4)	NFATC1	NFATC2	NFATC3	NFATC4	PPP3CA	PPP3CB	PPP3CC	PPP3R1	PPP3R2	CANX	CALR	IL2RB	IL2RG	JAK1	JAK3	HLA-A	HLA-B	HLA-C	HLA-E	HLA-F	HLA-G
HTLV-I infection (05166_8)	ADCY1	ADCY2	ADCY3	ADCY5	ADCY6	ADCY7	ADCY8	ADCY9	ADCY4	PRKACA	PRKACB	PRKACG	CREB1	ATF2	CREM	ATF1	ATF3	ATF4	XBP1	CRTC2	CRTC1	CRTC3
HTLV-I infection (05166_11)	NFKB1	RELA	NFKBIA	CHUK	IKBKB	IKBKG	IL1R1	IL1R2	CD3D	CD3E	CD3G	MAP3K3	JUN	PIK3CA	PIK3CB	PIK3CD	PIK3R1	PIK3R2	PIK3R3	AKT3	AKT1	AKT2	GSK3B
HTLV-I infection (05166_17)	NFKBIA	CHUK	IKBKB	MAP3K3	MAPK8	JUN	PDGFRA	PDGFRB	PIK3CA	PIK3CB	PIK3CD	PIK3R1	PIK3R2	PIK3R3	AKT3	AKT1	AKT2	DVL1	DVL2	DVL3	GSK3B	CTNNB1	APC2	APC
HTLV-I infection (05166_21)	SLC2A1	TGFBR1	TGFBR2	SMAD2	SMAD3	CREBBP	EP300	TCF3	TP53	TBPL2	TBP	TBPL1	MYB	NFKB1	RELA	CHEK1	CHEK2
Kaposi's sarcoma-associated herpesvirus infection (05167_6)	MAPK8	MAPK9	MAPK10	HIF1A	NFKB1	RELA	IL6	CXCL8	CXCL1	CXCL2	CXCL3	RCAN1	FGF2	VEGFA	PDGFB	NFATC1	NFATC2	NFATC3	NFATC4	PPP3CA	PPP3CB	PPP3CC	PPP3R1	PPP3R2	MAPK1	MAPK3	FOS	JUN	NFKBIA	ANGPT2
Kaposi's sarcoma-associated herpesvirus infection (05167_21)	HIF1A	NFKB1	RELA	CXCL1	CXCL2	CXCL3	RCAN1	FGF2	NFATC1	NFATC2	NFATC3	NFATC4	PPP3CA	PPP3CB	PPP3CC	PPP3R1	PPP3R2	FOS	JUN	CALML6	CALML5	CALM1	CALM2	CALM3	CALML3	CALML4
Kaposi's sarcoma-associated herpesvirus infection (05167_28)	MAPKAPK2	MAPK14	MAPK11	MAPK13	MAPK12	MAP2K6	IL6	CSF2	ZFP36
Herpes simplex infection (05168_4)	MAPK8	MAPK9	MAPK10	TLR3	TLR9	TLR2	TICAM1	MYD88	TAB1	TAB2	MAP3K7	IRF3	IRF7	IKBKG	TRAF6	USP7	IKBKB
Herpes simplex infection (05168_7)	POU2F3	HCFC2	HCFC1	CSNK2A1	CSNK2A2	CSNK2B	CDK2	CDK1
Herpes simplex infection (05168_8)	TRAF1	TRAF2	TRAF3	TRAF5	MAPK8	MAPK9	MAPK10	FOS	JUN	TICAM1	MYD88	TAB1	TAB2	MAP3K7	NFKBIA	NFKBIB	IKBKG	TRAF6	USP7	CHUK	IKBKB
Herpes simplex infection (05168_17)	SRPK1	SRSF8	SRSF1	SRSF2	SRSF3	SRSF4	SRSF5	SRSF6	SRSF7	SRSF9	C1QBP	CSNK2A1	CSNK2A2	CSNK2B
Herpes simplex infection (05168_18)	FAS	TNFRSF1A	FASLG	FADD	CASP8	CASP3	CYCS	TNF	NFKB1	RELA
Epstein-Barr virus infection (05169_2)	RBPJL	RBPJ	FCER2	FGR	MYC	CR2
Epstein-Barr virus infection (05169_6)	USP7	TP53	CDKN1A	MDM2
Epstein-Barr virus infection (05169_7)	TRADD	TRAF1	TRAF2	TRAF3	TRAF5	IKBKG	CHUK	NFKBIA	NFKBIB	NFKBIE	MAP3K14	IKBKB	TAB1	TAB2
Epstein-Barr virus infection (05169_8)	TRADD	TRAF1	TRAF2	TRAF3	TRAF5	IKBKG	CHUK	MAP3K14	IKBKB	NFKB2	RELB	PIK3CA	PIK3CB	PIK3CD	PIK3R1	PIK3R2	PIK3R3
Epstein-Barr virus infection (05169_14)	TRAF1	TRAF2	TRAF3	TRAF5	PIK3CA	PIK3CB	PIK3CD	PIK3R1	PIK3R2	PIK3R3	AKT3	AKT1	AKT2	LYN	SYK	NA	CD19	PLCG1	PLCG2	NEDD4
Epstein-Barr virus infection (05169_15)	DDX58	CHUK	IKBKB	TBK1	NFKBIA	NFKBIB	NFKBIE	NFKB1	RELA
Pathways in cancer (05200_4)	ITGB1	ITGA6	ITGA2	ITGA2B	ITGA3	ITGAV	PTK2	PTEN	ABL1	BCR	CRK	CRKL	CBL	PIK3CA	PIK3CB	PIK3CD	PIK3R1	PIK3R2	PIK3R3	JAK1	JAK2	JAK3	EGFR	ERBB2	PDGFRA	PDGFRB	IGF1R	KIT	FLT3	TFG	NTRK1	TPM3	TPR	TGFA	EGF	PDGFA	PDGFB	IGF1	IGF2	GSK3B	CHUK	IKBKB	IKBKG	MTOR	CASP9	BAD	MDM2	CDKN1B	GRB2
Pathways in cancer (05200_7)	PTK2	PTEN	ABL1	BCR	CRK	CRKL	CBL	PIK3CA	PIK3CB	PIK3CD	PIK3R1	PIK3R2	PIK3R3	STAT5A	STAT5B	JAK1	JAK2	JAK3	EGFR	ERBB2	PDGFRA	PDGFRB	IGF1R	KIT	FLT3	TFG	NTRK1	TPM3	TPR	TGFA	EGF	STAT3	STAT1	GRB2	SOS1	SOS2	HRAS	KRAS	NRAS	ARAF	RAF1	BRAF	RASSF1	RET	CCDC6	NCOA4	PLCG1	PLCG2	RALGDS
Pathways in cancer (05200_11)	CHUK	IKBKB	IKBKG	NFKBIA	NFKB1	NFKB2	RELA	PTGS2	NOS2	BCL2	BIRC8	BIRC2	BIRC3	XIAP	BIRC7	TRAF1	TRAF2	TRAF3	TRAF5	TRAF6	TRAF4	CCND1	BCL2L1	AKT3	AKT1	AKT2
Pathways in cancer (05200_12)	ABL1	BCR	PIK3CA	PIK3CB	PIK3CD	PIK3R1	PIK3R2	PIK3R3	STAT5A	STAT5B	JAK1	JAK2	JAK3	EGFR	ERBB2	TGFA	EGF	STAT3	STAT1	HRAS	KRAS	NRAS	PLCG1	PLCG2	BCL2L1	VEGFD	PGF	VEGFA	VEGFB	VEGFC	ALK	EML4	PIM2	PIM1	EPO	IFNA1	IFNA2	IFNA4	IFNA5	IFNA6	IFNA7	IFNA8	IFNA10	IFNA13	IFNA14	IFNA16	IFNA17	IFNA21	IFNG
Pathways in cancer (05200_19)	ARAF	RAF1	BRAF	MAP2K1	MAP2K2	JUN	FOS	MYC	DAPK1	DAPK3	DAPK2	CDK4	ETS1	VEGFD	PGF	VEGFA	VEGFB	VEGFC	MMP1	MMP2	MMP9	CXCL8	CCND1	MAPK1	MAPK3	RPS6KA5
Pathways in cancer (05200_20)	HRAS	KRAS	NRAS	ARAF	RAF1	BRAF	MAP2K1	MAP2K2	JUN	FOS	MYC	PRKCA	PRKCB	PRKCG	DAPK1	DAPK3	DAPK2	ETS1	MAPK1	MAPK3	RPS6KA5
Pathways in cancer (05200_22)	DVL1	DVL2	DVL3	PTEN	FZD10	FZD2	FZD5	FZD3	FZD1	FZD4	FZD6	FZD7	FZD8	FZD9	PIK3CA	PIK3CB	PIK3CD	PIK3R1	PIK3R2	PIK3R3	GSK3B	CHUK	IKBKB	IKBKG	MTOR	CASP9	BAD	MDM2	CDKN1B	LEF1	TCF7	TCF7L2	TCF7L1	CDKN1A	FOXO1	NKX3-1	AKT3	AKT1	AKT2	CTNNB1	LRP6	LRP5	FRAT1	FRAT2
Pathways in cancer (05200_24)	EGLN2	EGLN3	EGLN1	ELOB	ELOC	VHL	CUL2	RBX1	EPAS1	HIF1A	ARNT	ARNT2	CREBBP	EP300	PDGFB	VEGFD	PGF	VEGFA	VEGFB	VEGFC	TGFA	TGFB1	TGFB2	TGFB3	SLC2A1
Pathways in cancer (05200_31)	LEF1	TCF7	TCF7L2	TCF7L1	JUP	RARA	ZBTB16	PML	RUNX1	RUNX1T1	SPI1	CEBPA	CSF2RA	CSF3R	CSF1R	IL6	E2F1	E2F2	E2F3	MYC	CCND1	PPARD
Pathways in cancer (05200_34)	TP53	MDM2	CCND1	CCND2	CCND3	CDKN1A	CDK4	CDK6	RB1	CDKN2B	CDKN2A	GADD45G	GADD45A	GADD45B	BAX	BAK1	DDB2	POLK
Pathways in cancer (05200_44)	LEF1	TCF7	TCF7L2	TCF7L1	JUP	RARA	ZBTB16	PML	RUNX1	RUNX1T1	SPI1	CEBPA	CCNA1	CSF1R	CCND1	MYC	PPARD	NCOA3	NCOA1	FOS	JUN	SP1	ESR1	ESR2
Pathways in cancer (05200_45)	HRAS	KRAS	NRAS	EDNRA	EDNRB	BDKRB1	BDKRB2	PRKCA	PRKCB	PRKCG	GNA11	GNAQ	PLCB1	PLCB2	PLCB3	PLCB4	RASGRP1	RASGRP2	RASGRP4	RASGRP3
Chemical carcinogenesis (05204_3)	CYP1A1	CYP1B1	CYP2C19	CYP2C8	CYP2C9	CYP2C18	CYP3A4	GSTO2	GSTA5	HPGDS	GSTA1	GSTA2	GSTA3	GSTA4	GSTM1	GSTM2	GSTM3	GSTM4	GSTM5	GSTP1	GSTT1	GSTT2	GSTK1	MGST1	MGST2	MGST3	GSTT2B	GSTO1	EPHX1
Proteoglycans in cancer (05205_5)	RHOA	ROCK1	ROCK2	PIK3CA	PIK3CB	PIK3CD	PIK3R1	PIK3R2	PIK3R3	AKT3	AKT1	AKT2	PPP1R12A	PPP1R12B	PPP1R12C	PPP1CA	PPP1CB	PPP1CC	SLC9A1	GAB1	ANK1	ANK2	ANK3
Proteoglycans in cancer (05205_8)	ANK1	ANK2	ANK3	CD44	ITPR1	ITPR2	ITPR3	CAMK2A	CAMK2B	CAMK2D	CAMK2G	FLNA	FLNB	FLNC	PLCE1	RHOA
Proteoglycans in cancer (05205_10)	CD44	TIAM1	ROCK1	ROCK2	ARHGEF12	ANK1	ANK2	ANK3	RAC1	CDC42	PAK1	FLNA	FLNB	FLNC	ARHGEF1
Proteoglycans in cancer (05205_11)	CD44	TIAM1	ERBB2	ANK1	ANK2	ANK3	ARHGEF12	CDC42	PAK1	ACTB	ACTG1	IQGAP1	MAPK1	NANOG	VAV2	ARHGEF1	TWIST2	TWIST1
Proteoglycans in cancer (05205_13)	ACTB	ACTG1	IQGAP1	MAPK1	ELK1	ESR1	CD44	CCND1
Proteoglycans in cancer (05205_16)	CD44	TIAM1	ERBB2	ANK1	ANK2	ANK3	ARHGEF12	CDC42	IQGAP1	NANOG	DDX5	DROSHA	STAT3	VAV2	ARHGEF1	TWIST2	TWIST1	MIR10A	MIR10B
Proteoglycans in cancer (05205_19)	SMAD2	MDM2	TP53	FASLG	FAS	LUM	TGFB2
Proteoglycans in cancer (05205_20)	MAPK1	MAPK3	MMP9	PLAU	PLAUR	SDC1	HPSE	HPSE2
Proteoglycans in cancer (05205_24)	NUDT16L1	PXN	PTK2	SRC	PRKCA	FGF2	FGFR1	SDC4	ITGA5	ITGB1	FN1
Proteoglycans in cancer (05205_25)	DCN	TLR2	TLR4	PDCD4	TGFB1	ERBB2	ERBB3	ERBB4	MYC	CTNNB1	MET	CBL	HIF1A	TNF	IL12B	IGF1	IGF1R	MIR21	CD63	EGFR	MAPK1	MAPK3	CASP3
Proteoglycans in cancer (05205_26)	DCN	TLR2	TLR4	TGFB1	ERBB2	ERBB3	ERBB4	MYC	CTNNB1	MET	CBL	TIMP3	THBS1	HIF1A	VEGFA	TFAP4	IGF1	EGFR
Proteoglycans in cancer (05205_37)	SDC2	EZR	RDX	MSN	ACTB	ACTG1	ITGA5	ITGB1	FN1
Proteoglycans in cancer (05205_38)	FGF2	FGFR1	SDC4	ITGA5	ITGB1	FN1	FRS2	PLCG1	PLCG2
Proteoglycans in cancer (05205_39)	MAPK1	MAPK3	FRS2	GRB2	PTPN11	SOS1	SOS2	RRAS2	MRAS	HRAS	KRAS	NRAS	RRAS
Proteoglycans in cancer (05205_40)	FGF2	FGFR1	FN1	FRS2	GRB2	PTPN11	PLCG1	PLCG2	PRKCA	PRKCB	PRKCG
Proteoglycans in cancer (05205_41)	FGF2	FGFR1	FRS2	GRB2	PTPN11	SOS1	SOS2	PLCG1	PLCG2
Proteoglycans in cancer (05205_42)	GPC3	IHH	SHH	PTCH1	SMO
Proteoglycans in cancer (05205_47)	HSPG2	ITGA2	ITGB1	PRKACA	PRKACB	PRKACG	PTK2	MAPK14	MAPK11	MAPK13	MAPK12	PTPN6
Proteoglycans in cancer (05205_51)	GPC1	HBEGF	EGFR	FGF2	FGFR1	MAPK1	MAPK3
Proteoglycans in cancer (05205_52)	DCN	TLR2	TLR4	TGFB1	ERBB2	ERBB3	ERBB4	MET	IGF1	CD63	EGFR	CAV1	CAV2	CAV3
MicroRNAs in cancer (05206_2)	CDC25A	CDC25B	CDC25C	CDK6	MIRLET7A1	MIRLET7A2	MIRLET7A3	MIRLET7B	MIRLET7D	MIRLET7E	MIRLET7F1	MIRLET7F2	MIRLET7G	MIRLET7I	KRAS	MIR107	HMGA2
MicroRNAs in cancer (05206_8)	MIR1-1	MIR1-2	PIM1	HDAC4	FOXP1	MET
MicroRNAs in cancer (05206_10)	MIR21	MIR221	MIR222	PTEN
MicroRNAs in cancer (05206_30)	MIRLET7C	STAT3	MYC	CASP3	HRAS	KRAS	NRAS	HMGA2
MicroRNAs in cancer (05206_32)	MIR122	SLC7A1	CCNG1	HMOX1
MicroRNAs in cancer (05206_37)	MIRLET7A1	MIRLET7A2	MIRLET7A3	MIRLET7B	MIRLET7D	MIRLET7E	MIRLET7F1	MIRLET7F2	MIRLET7G	MIRLET7I	MIR143	MIR18A	KRAS	DNMT3A	MAPK7
MicroRNAs in cancer (05206_42)	MIR124-1	MIR124-2	MIR124-3	MIR137	MIR34A	CDK6
MicroRNAs in cancer (05206_54)	MIR20A	E2F1	E2F2	E2F3
MicroRNAs in cancer (05206_63)	MIR205	ERBB3	ZEB2	PRKCE
MicroRNAs in cancer (05206_71)	MIR15A	CCND1	BCL2	WNT3	WNT3A
MicroRNAs in cancer (05206_72)	MIR331	CDCA5	KIF23	ERBB2
MicroRNAs in cancer (05206_73)	MIR200A	MIR200B	MIR200C	BMI1	ZEB1	ZEB2	ZFPM2
MicroRNAs in cancer (05206_82)	MIR21	TPM1	PDCD4	SERPINB5
MicroRNAs in cancer (05206_83)	MIR31	FZD3	ITGA5	RDX	RHOA
MicroRNAs in cancer (05206_93)	MIR34B	MET	NOTCH1	NOTCH2	NOTCH3	NOTCH4	CDK6
MicroRNAs in cancer (05206_105)	MIR99A	MIR100	MIR101-1	MIR101-2	MIR125A	MIR125B1	MIR125B2	MIR145	MIR195	MIR7-1	MIR7-2	MIR7-3	MIR30A	MIR30B	MIR30C1	MIR30C2	MIR30D	MIR30E	MIR129-1	MIR129-2	MIR143	MIR29A	MIR29B1	MIR29B2	MIR29C	FGFR3	RAF1	PRKCA	PRKCB	PRKCG	MAP2K1	MAP2K2	MAPK1	SOS1	SOS2	GRB2
MicroRNAs in cancer (05206_106)	MIR145	MIR195	MIR7-1	MIR7-2	MIR7-3	MIR30A	MIR30B	MIR30C1	MIR30C2	MIR30D	MIR30E	MIR129-1	MIR129-2	MIR143	FGFR3	RAF1	PRKCA	PRKCB	PRKCG	MAP2K1	MAP2K2	MAPK1	SOS1	SOS2	GRB2	SHC1	PLCG1	PLCG2	PDGFA	SHC4	PDGFB	PDGFRB	KRAS
MicroRNAs in cancer (05206_107)	MIR10A	MIR10B	RASSF1	MAPK1	PRKCA	PRKCB	PRKCG	GRB2	FGFR3
MicroRNAs in cancer (05206_109)	MIR103B1	MIR103B2	MIR103A1	MIR103A2	RPS6KA5	PRKCA	PRKCB	PRKCG	FGFR3
Colorectal cancer (05210_1)	DCC	CASP3	CASP9	APPL1
Renal cell carcinoma (05211_1)	PTPN11	CRK	CRKL	RAPGEF1	SOS1	SOS2	GRB2	MET	GAB1	AKT3	AKT1	AKT2	PIK3CA	PIK3CB	PIK3CD	PIK3R1	PIK3R2	PIK3R3	HGF	MAPK1	MAPK3
Renal cell carcinoma (05211_6)	PTPN11	CRK	CRKL	GRB2	MET	GAB1	ETS1	PIK3CA	PIK3CB	PIK3CD	PIK3R1	PIK3R2	PIK3R3	JUN	MAPK1	MAPK3	MAP2K1	MAP2K2
Pancreatic cancer (05212_1)	ERBB2	TGFA	EGF	PIK3CA	PIK3CB	PIK3CD	PIK3R1	PIK3R2	PIK3R3	JAK1	AKT3	AKT1	AKT2	STAT3	STAT1	BCL2L1	NFKB1	RELA	VEGFA	EGFR	MTOR
Prostate cancer (05215_1)	AR	KLK3	HSP90AA1	HSP90AB1	HSP90B1	MAPK1	MAPK3	MAP2K1	MAP2K2	ARAF	RAF1	BRAF
Basal cell carcinoma (05217_2)	GLI1	PTCH1	PTCH2	BMP2	BMP4	WNT16	WNT4	WNT1	WNT2	WNT3	WNT5A	WNT6	WNT7A	WNT7B	WNT8A	WNT8B	WNT10B	WNT11	WNT2B	WNT9A	WNT9B	WNT10A	WNT5B	WNT3A	SUFU	DVL1	DVL2	DVL3	FZD10	FZD2	FZD5	FZD3	FZD1	FZD4	FZD6	FZD7	FZD8	FZD9	GLI2	GLI3	HHIP
Chronic myeloid leukemia (05220_1)	MECOM	RUNX1	HDAC1	HDAC2	CTBP1	CTBP2
Chronic myeloid leukemia (05220_8)	PTPN11	ABL1	BCR	MYC	STAT5A	STAT5B	SOS1	SOS2	GRB2	SHC2	SHC4	SHC3	SHC1	GAB2	CRK	CRKL	CBL	PIK3CA	PIK3CB	PIK3CD	PIK3R1	PIK3R2	PIK3R3	HRAS	KRAS	NRAS
Acute myeloid leukemia (05221_1)	RARA	ZBTB16	FLT3	SPI1	CEBPA	RUNX1	RUNX1T1	PPARD	MYC	JUP	CCNA1	CCND1	LEF1	TCF7	TCF7L2	TCF7L1	PML	CEBPE	BCL2A1	CD14	ITGAM	FCGR1A	DUSP6
Acute myeloid leukemia (05221_2)	KRAS	NRAS	FLT3	SPI1	CEBPA	RUNX1	RUNX1T1	STAT3	STAT5A	STAT5B	PML	RARA	PIM1	HRAS	PIM2	SOS1	SOS2	GRB2	KIT	AKT3	AKT1	AKT2	PIK3CA	PIK3CB	PIK3CD	PIK3R1	PIK3R2	PIK3R3	PER2	CD14	ITGAM	FCGR1A
Acute myeloid leukemia (05221_7)	RUNX1	CSF1R	MPO	CSF2	IL3
Breast cancer (05224_6)	JAG1	JAG2	NOTCH1	NOTCH2	NOTCH3	NOTCH4	DLL3	DLL1	DLL4	CCND1	CDKN1A	NFKB2	MYC	ERBB2	HES1	HES5	HEY1	HEY2	HEYL	FLT4
Breast cancer (05224_8)	PGR	NCOA3	NCOA1	WNT4	WNT1	TNFSF11
Hepatocellular carcinoma (05225_22)	ARID1B	ARID1A	SMARCB1	SMARCC1	SMARCC2	SMARCA2	SMARCA4	ARID2	ACTB	ACTG1	PHF10	DPF3	DPF1	ACTL6B	ACTL6A	SMARCD1	SMARCD2	SMARCD3	SMARCE1	PBRM1	BRD7	PHF10	DPF3	DPF1
Gastric cancer (05226_19)	CDX2	SHH	MUC2	REG4	ABCB1	CDH17
Gastric cancer (05226_20)	CDH1	CTNNA1	CTNNA2	CTNNA3	CTNNB1	JUP	MYC	CCND1	LEF1	TCF7	TCF7L2	TCF7L1
Central carbon metabolism in cancer (05230_6)	MYC	HIF1A	MAPK1	MAPK3	MTOR	SLC2A1	SLC2A2	HK1	HK2	HK3	HKDC1	PGAM4	PGAM1	PGAM2	PKM	LDHA	PDK1	GLS2	GLS	SIRT6	SLC1A5	PFKL	PFKM	PFKP
Central carbon metabolism in cancer (05230_8)	EGFR	ERBB2	FGFR1	FGFR3	FGFR2	FLT3	KIT	MET	NTRK1	NTRK3	PDGFRA	PDGFRB	RET	HRAS	KRAS	NRAS	RAF1	MAP2K1	MAP2K2	MAPK1	MAPK3
Choline metabolism in cancer (05231_2)	MAPK8	MAPK9	MAPK10	MAPK1	MAPK3	SOS1	SOS2	HRAS	KRAS	NRAS	MAP2K1	MAP2K2	RAF1	PIK3CA	PIK3CB	PIK3CD	PIK3R1	PIK3R2	PIK3R3	CHKA	CHKB	PLCG1	PCYT1A	PCYT1B	RALGDS	PLD1	PLD2	MTOR	PIP5K1C	PIP5K1A	PIP5K1B	RAC1	RAC2	RAC3	SP1	FOS	JUN	HIF1A	PLA2G4B	PLA2G4E	PLA2G4F	PLA2G4D	PLA2G4A	PLA2G4C	JMJD7-PLA2G4B
Choline metabolism in cancer (05231_4)	HRAS	KRAS	NRAS	RAF1	AKT3	AKT1	AKT2	PIK3CA	PIK3CB	PIK3CD	PIK3R1	PIK3R2	PIK3R3	PDPK1	EGFR	PDGFRA	PDGFRB	GRB2	EGF	PDGFA	PDGFB	PDGFC	PDGFD	CHKA	CHKB	RALGDS	PLD1	PLD2	SP1	FOS	JUN	HIF1A
Choline metabolism in cancer (05231_8)	MAPK1	MAPK3	SOS1	SOS2	HRAS	KRAS	NRAS	MAP2K1	MAP2K2	RAF1	PIK3CA	PIK3CB	PIK3CD	PIK3R1	PIK3R2	PIK3R3	CHKA	CHKB	PLCG1	RALGDS	PLD1	PLD2	RHEB	MTOR	RPS6KB1	RPS6KB2	EIF4EBP1	PIP5K1C	PIP5K1A	PIP5K1B	WAS	WASL	RAC1	RAC2	RAC3	WASF2	WASF3	WASF1	SP1	FOS	JUN	HIF1A
Inflammatory bowel disease (IBD) (05321_2)	TLR5	TLR2	NFKB1	RELA	TNF	TLR4
Inflammatory bowel disease (IBD) (05321_7)	NFKB1	RELA	IL12A	IL12B	IL12RB1	STAT4	STAT1	TBX21	IL2	IL18	JUN	IL12RB2	IL4	IL5	IL18RAP	IL18R1
Viral myocarditis (05416_1)	DAG1	LAMA2	DMD	ACTB	ACTG1
Viral myocarditis (05416_2)	CD55	FYN	ABL1	ABL2	CAV1	RAC1	RAC2	RAC3
Fluid shear stress and atherosclerosis (05418_2)	MAPK14	MAPK11	MAPK13	MAPK12	VCAM1	ICAM1	FOS	JUN	MAPK8	MAPK9	MAPK10	CCL2	MAP2K7	MAP2K4	MAP2K6	MMP2	MMP9	CTSL	SELE	TNF	IL1A	IL1B	IFNG	PDGFA	PDGFB	EDN1	VEGFA	MAP3K5	TNFRSF1A	IL1R1	IL1R2	MAP3K7	CHUK	IKBKB	IKBKG	NFKB1	RELA
Fluid shear stress and atherosclerosis (05418_4)	KEAP1	NFE2L2	MAPK7	MAP2K5
Fluid shear stress and atherosclerosis (05418_7)	NOX1	CYBA	NCF1	NCF2	RAC1	RAC2	RAC3	BMPR1A	BMPR1B	BMPR2	ACVR1	ACVR2A	ACVR2B	BMP4
Fluid shear stress and atherosclerosis (05418_8)	PRKCZ	PIAS4	TP53	SUMO4	SUMO3	SUMO2	SUMO1	BCL2
Fluid shear stress and atherosclerosis (05418_9)	AKT3	AKT1	AKT2	PIK3CA	PIK3CB	PIK3CD	PIK3R1	PIK3R2	PIK3R3	CDH5	PECAM1	KDR	CTNNB1	ITGA2B	ITGAV	ITGB3	SRC	PTK2	PRKAA1	PRKAA2	NOS3
Fluid shear stress and atherosclerosis (05418_10)	AKT3	AKT1	AKT2	SRC	PTK2	ACTB	ACTG1	RHOA	ARHGEF2
Fluid shear stress and atherosclerosis (05418_12)	AKT3	AKT1	AKT2	PIK3CA	PIK3CB	PIK3CD	PIK3R1	PIK3R2	PIK3R3	PTK2	NOS3	GPC1	SDC1	SDC2	SDC4
Fluid shear stress and atherosclerosis (05418_16)	AKT3	AKT1	AKT2	NOS3	CAV1	CAV2	CAV3	CALML6	CALML5	CALM1	CALM2	CALM3	CALML3	CALML4	HSP90AA1	HSP90AB1	HSP90B1	GPC1	SDC1	SDC2	SDC4
Fluid shear stress and atherosclerosis (05418_18)	VCAM1	ICAM1	FOS	JUN	CCL2	NQO1	HMOX1	GSTO2	GSTA5	GSTA1	GSTA2	GSTA3	GSTA4	GSTM1	GSTM2	GSTM3	GSTM4	GSTM5	GSTP1	GSTT1	GSTT2	MGST1	MGST2	MGST3	GSTT2B	GSTO1	TXN2	TXN	SQSTM1	NOS3	NPPC	ASS1	THBD	PLAT	MMP2	MMP9	CTSL	SELE	TNF	IL1A	IL1B	IFNG	PDGFA	PDGFB	EDN1	VEGFA	MAP3K7	CHUK	IKBKB
[truncated: 350 more columns]

## Sheet: Table S4
Table S4. Premature ovarian insufficiency (POI)-related genes (n = 127).
Gene Symbol
FMR1
ESR1
MTHFR
VEGFA
AR
ADIPOQ
SF1
GDF9
ERCC6
CXCL12
CDKN1B
KDR
CYP19A1
LMNA
COL1A1
FOXO3
HSPA5
TYMS
POU5F1
AMH
NBN
FANCM
SKP2
PRL
ACTB
MSH5
MTRR
TG
KITLG
MCM8
ACTN4
SALL4
TGFBR3
GALT
FANCA
FST
FOXE1
PCSK1
TSHB
INHBB
EXO1
STAG3
WNT4
PGRMC1
LAMC1
FOXO4
HSD17B4
PCMT1
SYCE1
HFM1
SELENBP1
CITED2
ACVR2B
DMC1
BCKDHB
LARS2
MSH4
LHX8
HELQ
GPR3
ACSL6
NANOS3
SPO11
ADAMTS16
NLRP5
DACH2
ADAMTS19
PABPC5
BMP15
POF1B
FOXL2
LHR
FSHR
INHA
DIAPH2
FIGLA
NOBOX
MCM9
EIF2B2
COMT
ABCC3
ABCC4
ABCC1
SLC10A1
SLC22A10
SLC22A6
SLC51A
SLC51B
ABCC2
SLCO4A1
ABCC11
SLCO3A1
NR1I2
SHBG
ESR2
CYP1A2
UGT1A1
ALB
FABP2
CYP3A4
CYP3A5
CYP3A7
SLC22A2
SLC22A1
SLC22A3
SLCO2B1
SLCO1A2
ABCC10
SLC22A11
ABCG2
SLCO1B1
ABCB1
CYP1A1
CYP1B1
CYP2C19
CYP2C8
CYP2C9
SLC22A8
SLCO1B3
SLCO1C1
CHRNA4
NCOA2
GPER1
MT-ATP6
BECN1
HSD17B2
ESRRG
